# Supplementary material for: Alkamides Activate Jasmonic Acid Biosynthesis and Signaling Pathways and Confer Resistance to Botrytis cinerea in Arabidopsis thaliana
Source: PubMed Central journal article supplement (PMC3208606; doi:10.1371/journal.pone.0027251), 2011-11-04
Supplement: pone.0027251.s005.pdf [file pone.0027251.s005.pdf]

**Table S1.** Differentially expressed genes by *N*-Isobutyl decanamide in *Arabidopsis*. Genes were selected according to the stringency levels (FDR  $\leq 0.05$  and Fold  $\pm 2$ ) in at least one of the four sampled time points, 1, 3, 7 and 14 days after transference (d.a.t.). Each gene is represented by a single row of colored boxes and each sampled time points, is represented by a single column. Color scale ranges are shown as intensities of blue and red colors (down-regulated and up-regulated, respectively), indicating the range from fold change values.

|    | Locus     | Description                                               | FDR D*T | FDR T | FoldChange (d.a.t.) |       |       |       |
|----|-----------|-----------------------------------------------------------|---------|-------|---------------------|-------|-------|-------|
|    |           |                                                           |         |       | 1                   | 3     | 7     | 14    |
| 1  | At3g21340 | leucine-rich repeat protein kinase, putative              | >0.05   | 0.003 | 0.346               | 0.197 | 0.484 | 0.563 |
| 2  | At4g16410 | similar to hypothetical protein [Vitis vinifera] (GB:CAN7 | 0.037   | 0.022 | 1.164               | 0.736 | 0.484 | 0.855 |
| 3  | At5g50915 | basic helix-loop-helix (bHLH) family protein              | >0.05   | 0.031 | 0.987               | 0.793 | 0.344 | 0.808 |
| 4  | At1g42550 | PMI1 (PLASTID MOVEMENT IMPAIRED1)                         | 0.047   | 0.026 | 1.018               | 0.828 | 0.499 | 0.903 |
| 5  | At3g21870 | CYCP2;1 (cyclin p2;1); cyclin-dependent protein kinase    | 0.020   | 0.008 | 1.208               | 0.707 | 0.282 | 0.724 |
| 6  | At4g26530 | fructose-bisphosphate aldolase, putative                  | 0.020   | 0.008 | 1.170               | 0.747 | 0.417 | 0.796 |
| 7  | At5g20630 | GLP3 (GERMIN-LIKE PROTEIN 3); manganese ion bindin        | >0.05   | 0.024 | 1.007               | 0.795 | 0.338 | 0.672 |
| 8  | At5g22020 | strictosidine synthase family protein                     | 0.035   | 0.004 | 0.967               | 0.818 | 0.434 | 0.636 |
| 9  | At2g18560 | UDP-glucuronosyl/UDP-glucosyl transferase family pro      | 0.021   | 0.002 | 0.922               | 0.829 | 0.433 | 0.690 |
| 10 | At2g29130 | LAC2 (laccase 2); copper ion binding / oxidoreductase     | >0.05   | 0.010 | 1.030               | 0.715 | 0.394 | 0.689 |
| 11 | At3g05730 | similar to hormone [Arabidopsis thaliana] (TAIR:AT3G0     | >0.05   | 0.031 | 1.080               | 0.649 | 0.423 | 0.709 |
| 12 | At5g35630 | GS2 (GLUTAMINE SYNTHETASE 2); glutamate-ammonia           | 0.031   | 0.014 | 0.920               | 0.667 | 0.425 | 1.073 |
| 13 | At5g38420 | ribulose bisphosphate carboxylase small chain 2B / RuF    | 0.039   | 0.020 | 0.929               | 0.668 | 0.374 | 1.034 |
| 14 | At5g03555 | permease, cytosine/purines, uracil, thiamine, allantoin   | 0.049   | 0.019 | 0.946               | 0.737 | 0.461 | 0.973 |
| 15 | At3g22210 | unknown protein                                           | 0.028   | 0.005 | 0.925               | 0.731 | 0.456 | 0.877 |
| 16 | At4g25700 | BETA-OHASE 1 (BETA-HYDROXYLASE 1); beta-carotene          | 0.038   | 0.013 | 1.030               | 0.695 | 0.443 | 0.899 |
| 17 | At4g28080 | binding                                                   | 0.032   | 0.006 | 1.018               | 0.668 | 0.445 | 0.840 |
| 18 | At5g62210 | embryo-specific protein-related                           | >0.05   | 0.030 | 0.933               | 0.804 | 0.495 | 0.978 |
| 19 | At3g11110 | zinc finger (C3HC4-type RING finger) family protein       | 0.050   | 0.027 | 0.927               | 0.743 | 0.335 | 0.945 |
| 20 | At5g04150 | BHLH101; DNA binding / transcription factor               | 0.037   | 0.019 | 0.827               | 0.773 | 0.187 | 0.856 |
| 21 | At1g50730 | similar to unnamed protein product [Vitis vinifera] (GB   | 0.012   | 0.017 | 1.290               | 0.758 | 0.399 | 0.972 |
| 22 | At1g14150 | oxygen evolving enhancer 3 (PsbQ) family protein          | 0.008   | >0.05 | 1.292               | 0.798 | 0.351 | 0.992 |
| 23 | At1g68010 | HPR (HYDROXYPYRUVATE REDUCTASE); glycerate dehy           | 0.021   | 0.020 | 1.052               | 0.744 | 0.457 | 1.063 |
| 24 | At3g01500 | CA1 (CARBONIC ANHYDRASE 1); carbonate dehydratas          | 0.035   | >0.05 | 1.143               | 0.731 | 0.443 | 1.095 |
| 25 | At1g68110 | epsin N-terminal homology (ENTH) domain-containing        | 0.020   | >0.05 | 1.248               | 0.746 | 0.424 | 1.108 |
| 26 | At1g19150 | LHCA6 (Photosystem I light harvesting complex gene 6)     | 0.032   | 0.048 | 1.230               | 0.689 | 0.458 | 0.987 |
| 27 | At5g05270 | chalcone-flavanone isomerase family protein               | 0.009   | 0.033 | 1.144               | 1.287 | 0.298 | 0.873 |
| 28 | At3g55120 | A11/CFI/TT5 (TRANSPARENT TESTA 5); chalcone isome         | 0.004   | 0.005 | 1.111               | 1.239 | 0.333 | 0.783 |
| 29 | At5g08640 | FLS (FLAVONOL SYNTHASE)                                   | 0.009   | 0.010 | 1.067               | 1.179 | 0.243 | 0.792 |
| 30 | At3g51240 | F3H (TRANSPARENT TESTA 6); naringenin 3-dioxygenas        | 0.009   | >0.05 | 1.472               | 1.160 | 0.322 | 0.822 |
| 31 | At3g55630 | ATDFD (A. THALIANA DHFS-FPGS HOMOLOG D); tetrah           | 0.013   | 0.024 | 1.197               | 1.080 | 0.356 | 0.790 |
| 32 | At4g25780 | pathogenesis-related protein, putative                    | 0.016   | >0.05 | 1.197               | 1.085 | 0.447 | 0.880 |
| 33 | At5g05250 | similar to unknown protein [Arabidopsis thaliana] (TAI    | 0.035   | >0.05 | 1.265               | 1.072 | 0.331 | 0.876 |
| 34 | At1g78380 | ATGSTU19 (GLUTATHIONE TRANSFERASE 8); glutathior          | 0.020   | >0.05 | 1.304               | 1.136 | 0.482 | 0.772 |
| 35 | At2g22590 | glycosyltransferase family protein                        | 0.012   | 0.022 | 1.068               | 1.279 | 0.410 | 0.733 |
| 36 | At4g15480 | UGT84A1; UDP-glycosyltransferase/ sinapate 1-glucosy      | 0.012   | >0.05 | 1.068               | 1.555 | 0.273 | 0.770 |
| 37 | At4g01915 | unknown protein                                           | 0.009   | >0.05 | 1.141               | 1.392 | 0.450 | 0.874 |
| 38 | At5g13930 | ATCHS/CHS/TT4 (CHALCONE SYNTHASE); naringenin-cl          | 0.008   | 0.002 | 1.067               | 1.067 | 0.330 | 0.599 |
| 39 | At1g48300 | similar to hypothetical protein [Vitis vinifera] (GB:CAN8 | 0.017   | 0.005 | 1.029               | 0.993 | 0.404 | 0.663 |
| 40 | At5g16530 | PIN5 (PIN-FORMED 5); auxin:hydrogen symporter/ trar       | 0.015   | 0.005 | 0.965               | 1.009 | 0.363 | 0.675 |
| 41 | At5g43630 | zinc knuckle (CCHC-type) family protein                   | 0.021   | 0.011 | 0.815               | 1.166 | 0.363 | 0.706 |

|    |           |                                                                |       |       |       |       |       |       |
|----|-----------|----------------------------------------------------------------|-------|-------|-------|-------|-------|-------|
| 42 | At1g32375 | F-box family protein                                           | 0.048 | 0.044 | 0.938 | 1.132 | 0.432 | 0.703 |
| 43 | At1g50290 | unknown protein                                                | 0.013 | 0.012 | 1.007 | 0.973 | 0.417 | 0.954 |
| 44 | At1g72645 | unknown protein                                                | 0.029 | 0.044 | 0.947 | 0.994 | 0.321 | 0.939 |
| 45 | At4g27410 | RD26 (RESPONSIVE TO DESSICATION 26); transcription             | 0.047 | >0.05 | 0.858 | 1.023 | 0.452 | 0.981 |
| 46 | At1g65060 | 4CL3 (4-coumarate:CoA ligase 3); 4-coumarate-CoA ligase        | >0.05 | 0.038 | 0.958 | 0.870 | 0.328 | 0.794 |
| 47 | At1g80440 | kelch repeat-containing F-box family protein                   | 0.040 | 0.026 | 0.986 | 0.959 | 0.489 | 0.834 |
| 48 | At4g37760 | SQE3 (SQUALENE EPOXIDASE 3); oxidoreductase                    | 0.013 | 0.006 | 1.073 | 0.925 | 0.462 | 0.850 |
| 49 | At1g79270 | ECT8 (evolutionarily conserved C-terminal region 8)            | 0.028 | 0.016 | 0.927 | 1.018 | 0.481 | 0.829 |
| 50 | At5g21430 | DNAJ heat shock N-terminal domain-containing protein           | 0.026 | >0.05 | 1.341 | 0.951 | 0.484 | 1.046 |
| 51 | At1g66130 | oxidoreductase N-terminal domain-containing protein            | 0.042 | >0.05 | 1.283 | 0.923 | 0.497 | 1.066 |
| 52 | At2g05620 | PGR5 (PROTON GRADIENT REGULATION 5)                            | 0.018 | >0.05 | 1.219 | 0.952 | 0.499 | 1.138 |
| 53 | At5g38510 | rhomboid family protein                                        | 0.015 | >0.05 | 1.351 | 1.016 | 0.466 | 1.098 |
| 54 | At3g47430 | PEX11B                                                         | 0.020 | >0.05 | 1.556 | 1.054 | 0.417 | 1.074 |
| 55 | At1g22630 | heat shock protein binding / unfolded protein binding          | 0.021 | >0.05 | 1.305 | 1.013 | 0.463 | 1.234 |
| 56 | At5g25130 | CYP71B12 (cytochrome P450, family 71, subfamily B, protein 12) | 0.019 | >0.05 | 1.326 | 0.947 | 0.258 | 1.085 |
| 57 | At1g18730 | similar to unknown [Populus trichocarpa] (GB:ABK9526)          | 0.043 | >0.05 | 1.140 | 0.956 | 0.492 | 1.042 |
| 58 | At3g15354 | SPA3 (SPA1-RELATED 3); signal transducer                       | 0.013 | >0.05 | 1.098 | 0.998 | 0.392 | 1.091 |
| 59 | At3g56290 | similar to hypothetical protein [Vitis vinifera] (GB:CAN7)     | 0.012 | 0.019 | 1.251 | 0.959 | 0.252 | 0.884 |
| 60 | At5g37260 | CIR1/RVE2 (CIRCADIAN 1); DNA binding / transcription           | 0.020 | >0.05 | 1.687 | 0.922 | 0.288 | 0.698 |
| 61 | At2g38230 | ATPDX1.1 (PYRIDOXINE BIOSYNTHESIS 1.1); protein helix          | 0.020 | >0.05 | 1.374 | 0.874 | 0.402 | 0.863 |
| 62 | At4g25910 | NFU3 (NFU domain protein 3)                                    | 0.020 | >0.05 | 1.297 | 0.895 | 0.484 | 0.915 |
| 63 | At1g14200 | zinc finger (C3HC4-type RING finger) family protein            | 0.031 | >0.05 | 1.373 | 0.856 | 0.425 | 0.842 |
| 64 | At4g12830 | hydrolase, alpha/beta fold family protein                      | 0.013 | 0.045 | 1.434 | 0.916 | 0.332 | 0.915 |
| 65 | At3g02830 | ZFN1 (ZINC FINGER PROTEIN 1); nucleic acid binding             | 0.036 | >0.05 | 1.159 | 0.897 | 0.495 | 1.205 |
| 66 | At4g33666 | unknown protein                                                | 0.038 | >0.05 | 1.020 | 0.963 | 0.477 | 1.218 |
| 67 | At5g10140 | FLC (FLOWERING LOCUS C); transcription factor                  | 0.013 | >0.05 | 1.481 | 1.876 | 0.451 | 0.861 |
| 68 | At2g23910 | cinnamoyl-CoA reductase-related                                | 0.009 | >0.05 | 1.419 | 1.569 | 0.439 | 0.885 |
| 69 | At5g48880 | KAT5/PKT1/PKT2 (PEROXISOMAL 3-KETO-ACYL-COA THIO               | 0.006 | >0.05 | 1.378 | 1.379 | 0.462 | 1.033 |
| 70 | At1g47400 | similar to unknown protein [Arabidopsis thaliana] (TAIR        | 0.033 | >0.05 | 1.522 | 1.535 | 0.420 | 1.133 |
| 71 | At3g24500 | ATMBF1C/MBF1C (MULTIPROTEIN BRIDGING FACTOR 1C)                | 0.025 | >0.05 | 1.361 | 1.644 | 0.446 | 1.055 |
| 72 | At5g37550 | similar to unknown protein [Arabidopsis thaliana] (TAIR        | 0.017 | >0.05 | 1.119 | 1.880 | 0.383 | 0.974 |
| 73 | At5g39210 | CRR7 (CHLORORESPIRATORY REDUCTION 7)                           | 0.030 | >0.05 | 1.585 | 1.052 | 0.491 | 0.888 |
| 74 | At5g55570 | heat shock protein binding / unfolded protein binding          | 0.025 | >0.05 | 1.714 | 1.080 | 0.493 | 0.886 |
| 75 | At1g07400 | 17.8 kDa class I heat shock protein (HSP17.8-CI)               | 0.032 | >0.05 | 1.768 | 1.274 | 0.467 | 0.911 |
| 76 | At3g01440 | oxygen evolving enhancer 3 (PsbQ) family protein               | 0.020 | >0.05 | 1.867 | 1.204 | 0.462 | 0.790 |
| 77 | At5g58770 | dehydrodolichyl diphosphate synthase, putative / DED           | 0.019 | >0.05 | 1.542 | 1.372 | 0.404 | 1.330 |
| 78 | At2g32290 | BAM6/BMY5 (BETA-AMYLASE 6); beta-amylase                       | 0.019 | >0.05 | 1.628 | 1.338 | 0.413 | 1.378 |
| 79 | At2g36790 | UGT73C6 (UDP-GLUCOSYL TRANSFERASE 73C6); UDP-g                 | 0.037 | >0.05 | 2.231 | 1.013 | 0.367 | 1.519 |
| 80 | At5g37640 | UBQ9 (ubiquitin 9)                                             | 0.039 | >0.05 | 0.885 | 1.410 | 0.484 | 0.759 |
| 81 | At5g04000 | similar to hypothetical protein [Vitis vinifera] (GB:CAN7)     | 0.016 | >0.05 | 1.305 | 1.491 | 0.430 | 0.578 |
| 82 | At4g23496 | SP1L5 (SPIRAL1-LIKE5)                                          | 0.008 | 0.009 | 0.972 | 1.466 | 0.593 | 0.482 |
| 83 | At1g73120 | similar to hypothetical protein [Vitis vinifera] (GB:CAN6)     | 0.018 | >0.05 | 1.325 | 1.378 | 0.376 | 2.427 |
| 84 | At5g05500 | pollen Ole e 1 allergen and extensin family protein            | 0.033 | 0.008 | 0.388 | 0.405 | 0.716 | 1.239 |
| 85 | At2g25980 | jacalin lectin family protein                                  | 0.039 | 0.009 | 0.327 | 0.356 | 0.722 | 1.236 |
| 86 | At1g54000 | myrosinase-associated protein, putative                        | >0.05 | 0.014 | 0.381 | 0.373 | 0.688 | 1.124 |
| 87 | At1g43160 | RAP2.6 (related to AP2 6); DNA binding / transcription         | >0.05 | 0.016 | 0.402 | 0.373 | 0.791 | 1.101 |
| 88 | At5g28510 | glycosyl hydrolase family 1 protein                            | 0.045 | 0.009 | 0.412 | 0.489 | 0.800 | 1.072 |
| 89 | At4g33790 | acyl CoA reductase, putative                                   | >0.05 | 0.008 | 0.141 | 0.189 | 0.577 | 1.042 |
| 90 | At5g58010 | basic helix-loop-helix (bHLH) family protein                   | >0.05 | 0.006 | 0.355 | 0.430 | 0.690 | 1.055 |

|     |           |                                                                   |       |       |       |       |       |       |
|-----|-----------|-------------------------------------------------------------------|-------|-------|-------|-------|-------|-------|
| 91  | At1g67330 | similar to unknown protein [Arabidopsis thaliana] (TAIR)          | >0.05 | 0.024 | 0.460 | 0.566 | 0.774 | 1.131 |
| 92  | At5g06640 | proline-rich extensin-like family protein                         | >0.05 | 0.006 | 0.311 | 0.304 | 0.629 | 0.841 |
| 93  | At4g08410 | proline-rich extensin-like family protein                         | >0.05 | 0.019 | 0.450 | 0.459 | 0.749 | 0.909 |
| 94  | At2g41810 | similar to unknown protein [Arabidopsis thaliana] (TAIR)          | >0.05 | 0.021 | 0.399 | 0.377 | 0.721 | 0.908 |
| 95  | At3g54580 | proline-rich extensin-like family protein                         | >0.05 | 0.006 | 0.353 | 0.332 | 0.618 | 0.908 |
| 96  | At5g42510 | disease resistance-responsive family protein                      | >0.05 | 0.016 | 0.512 | 0.443 | 0.779 | 0.883 |
| 97  | At2g24980 | proline-rich extensin-like family protein                         | >0.05 | 0.015 | 0.382 | 0.353 | 0.718 | 0.830 |
| 98  | At1g05240 | peroxidase, putative                                              | 0.040 | 0.002 | 0.236 | 0.185 | 0.535 | 0.708 |
| 99  | At1g05250 | peroxidase, putative                                              | >0.05 | 0.003 | 0.281 | 0.202 | 0.566 | 0.738 |
| 100 | At3g06460 | GNS1/SUR4 membrane family protein                                 | >0.05 | 0.007 | 0.452 | 0.365 | 0.648 | 0.824 |
| 101 | At1g50520 | CYP705A27 (cytochrome P450, family 705, subfamily A)              | >0.05 | 0.004 | 0.436 | 0.485 | 0.698 | 0.789 |
| 102 | At2g34180 | CIPK13 (SNF1-RELATED PROTEIN KINASE 3.7); kinase                  | >0.05 | 0.012 | 0.480 | 0.485 | 0.761 | 0.832 |
| 103 | At1g11740 | ankyrin repeat family protein                                     | >0.05 | 0.038 | 0.313 | 0.412 | 0.670 | 0.844 |
| 104 | At3g54590 | ATHRGP1; structural constituent of cell wall                      | >0.05 | 0.010 | 0.347 | 0.392 | 0.652 | 0.866 |
| 105 | At5g51520 | invertase/pectin methylesterase inhibitor family protei           | >0.05 | 0.013 | 0.453 | 0.425 | 0.975 | 0.826 |
| 106 | At2g43220 | DC1 domain-containing protein                                     | >0.05 | 0.016 | 0.368 | 0.321 | 0.893 | 0.765 |
| 107 | At5g65690 | PCK2/PEPCK (PHOSPHOENOLPYRUVATE CARBOXYKINA                       | >0.05 | 0.011 | 0.203 | 0.218 | 0.832 | 0.653 |
| 108 | At1g52250 | dynein light chain type 1 family protein                          | >0.05 | 0.008 | 0.462 | 0.449 | 0.838 | 0.769 |
| 109 | At3g16240 | DELTA-TIP (delta tonoplast integral protein); water cha           | 0.049 | 0.003 | 0.420 | 0.375 | 0.843 | 0.770 |
| 110 | At4g20460 | NAD-dependent epimerase/dehydratase family proteir                | >0.05 | 0.019 | 0.436 | 0.491 | 0.836 | 0.892 |
| 111 | At5g05900 | UDP-glucuronosyl/UDP-glucosyl transferase family pro              | >0.05 | 0.025 | 0.560 | 0.326 | 0.572 | 0.868 |
| 112 | At1g52050 | jacalin lectin family protein                                     | >0.05 | 0.009 | 0.323 | 0.118 | 0.320 | 0.776 |
| 113 | At1g52060 | similar to jacalin lectin family protein [Arabidopsis thal        | >0.05 | 0.008 | 0.326 | 0.087 | 0.237 | 0.798 |
| 114 | At3g26520 | TIP2 (TONOPLAST INTRINSIC PROTEIN 2); water channe                | 0.045 | 0.002 | 0.662 | 0.432 | 0.632 | 0.846 |
| 115 | At1g22530 | PATL2; transporter                                                | >0.05 | 0.001 | 0.603 | 0.392 | 0.554 | 0.800 |
| 116 | At1g29490 | auxin-responsive family protein                                   | >0.05 | 0.043 | 0.617 | 0.443 | 0.675 | 0.872 |
| 117 | At3g15450 | similar to unknown protein [Arabidopsis thaliana] (TAIR)          | >0.05 | 0.010 | 0.541 | 0.364 | 0.626 | 0.770 |
| 118 | At4g12730 | FLA2                                                              | 0.024 | 0.001 | 0.611 | 0.428 | 0.657 | 0.817 |
| 119 | At5g60660 | PIP2;4/PIP2F (plasma membrane intrinsic protein 2;4);             | >0.05 | 0.002 | 0.402 | 0.282 | 0.590 | 0.692 |
| 120 | At5g28770 | BZO2H3 (ARABIDOPSIS THALIANA BASIC LEUCINE ZIPPE                  | >0.05 | 0.047 | 0.628 | 0.445 | 0.732 | 1.002 |
| 121 | At5g66815 | unknown protein                                                   | >0.05 | 0.029 | 0.557 | 0.361 | 0.693 | 0.990 |
| 122 | At4g11210 | disease resistance-responsive family protein / dirigent           | >0.05 | 0.011 | 0.562 | 0.364 | 0.680 | 0.907 |
| 123 | At2g45040 | matrix metalloproteinase                                          | >0.05 | 0.009 | 0.680 | 0.472 | 0.799 | 0.949 |
| 124 | At1g17190 | ATGSTU26 (Arabidopsis thaliana Glutathione S-transfer             | >0.05 | 0.009 | 0.620 | 0.394 | 0.777 | 0.958 |
| 125 | At5g60520 | late embryogenesis abundant protein-related / LEA prc             | >0.05 | 0.007 | 0.393 | 0.262 | 0.629 | 1.050 |
| 126 | At1g53680 | ATGSTU28 (Arabidopsis thaliana Glutathione S-transfer             | >0.05 | 0.040 | 0.660 | 0.447 | 0.869 | 0.938 |
| 127 | At3g20940 | CYP705A30 (cytochrome P450, family 705, subfamily A)              | >0.05 | 0.035 | 0.587 | 0.423 | 0.806 | 0.918 |
| 128 | At5g33355 | similar to unknown protein [Arabidopsis thaliana] (TAIR)          | >0.05 | 0.007 | 0.500 | 0.202 | 0.530 | 0.808 |
| 129 | At3g19850 | phototropic-responsive NPH3 family protein                        | >0.05 | 0.010 | 0.656 | 0.398 | 0.698 | 0.853 |
| 130 | At5g55480 | glycerophosphoryl diester phosphodiesterase family pi             | >0.05 | 0.042 | 0.697 | 0.441 | 0.750 | 0.875 |
| 131 | At3g19430 | late embryogenesis abundant protein-related / LEA prc             | >0.05 | 0.008 | 0.613 | 0.330 | 0.690 | 0.851 |
| 132 | At3g48940 | remorin family protein                                            | >0.05 | 0.029 | 0.634 | 0.350 | 0.780 | 0.817 |
| 133 | At3g59930 | similar to unknown protein [Arabidopsis thaliana] (TAIR)          | >0.05 | 0.014 | 0.454 | 0.173 | 0.642 | 0.791 |
| 134 | At1g52070 | jacalin lectin family protein                                     | 0.048 | 0.006 | 0.357 | 0.126 | 0.397 | 1.155 |
| 135 | At2g31085 | CLE6 (CLAVATA3/ESR-RELATED 6); receptor binding                   | 0.030 | 0.006 | 0.593 | 0.300 | 0.638 | 1.155 |
| 136 | At2g31082 | CLE7 (CLAVATA3/ESR-RELATED 7); receptor binding                   | >0.05 | 0.024 | 0.492 | 0.157 | 0.418 | 1.273 |
| 137 | At3g21180 | ACA9 (autoinhibited Ca <sup>2+</sup> -ATPase 9); calcium-transpor | >0.05 | 0.025 | 0.800 | 0.351 | 0.630 | 1.011 |
| 138 | At5g22940 | exostosin family protein                                          | >0.05 | 0.043 | 0.793 | 0.457 | 0.849 | 0.959 |
| 139 | At2g31081 | CLE4 (CLAVATA3/ESR-RELATED 4); receptor binding                   | >0.05 | 0.009 | 0.798 | 0.268 | 0.652 | 0.792 |

|     |           |                                                          |       |       |       |       |       |       |
|-----|-----------|----------------------------------------------------------|-------|-------|-------|-------|-------|-------|
| 140 | At3g59020 | protein transporter                                      | >0.05 | 0.010 | 0.795 | 0.466 | 0.823 | 0.827 |
| 141 | At5g19040 | ATIPT5 (Arabidopsis thaliana isopentenyltransferase 5)   | >0.05 | 0.012 | 0.542 | 0.416 | 0.531 | 1.067 |
| 142 | At2g32300 | UCC1 (UCLACYANIN 1); copper ion binding                  | >0.05 | 0.010 | 0.540 | 0.464 | 0.538 | 1.049 |
| 143 | At5g60530 | late embryogenesis abundant protein-related / LEA pr     | >0.05 | 0.033 | 0.573 | 0.436 | 0.565 | 1.226 |
| 144 | At4g14040 | EDA38 (embryo sac development arrest 38); selenium l     | 0.033 | 0.004 | 0.592 | 0.447 | 0.610 | 1.097 |
| 145 | At2g19280 | pentatricopeptide (PPR) repeat-containing protein        | >0.05 | 0.039 | 0.558 | 0.310 | 0.445 | 1.123 |
| 146 | At5g42180 | peroxidase 64 (PER64) (P64) (PRXR4)                      | >0.05 | 0.013 | 0.469 | 0.566 | 0.589 | 0.997 |
| 147 | At3g10710 | pectinesterase family protein                            | >0.05 | 0.031 | 0.422 | 0.459 | 0.584 | 1.016 |
| 148 | At3g50640 | similar to unknown protein [Arabidopsis thaliana] (TAI   | >0.05 | 0.019 | 0.445 | 0.457 | 0.561 | 1.060 |
| 149 | At1g03870 | FLA9                                                     | >0.05 | 0.003 | 0.469 | 0.358 | 0.478 | 0.832 |
| 150 | At1g78000 | SULTR1;2 (SULFATE TRANSPORTER 1;2); sulfate transm       | >0.05 | 0.004 | 0.488 | 0.498 | 0.605 | 0.837 |
| 151 | At2g28670 | disease resistance-responsive family protein / fibroin-r | >0.05 | 0.006 | 0.457 | 0.431 | 0.514 | 0.883 |
| 152 | At1g52240 | ATROPGEF11/ROPGEF11 (KINASE PARTNER PROTEIN-L            | >0.05 | 0.012 | 0.421 | 0.324 | 0.554 | 0.956 |
| 153 | At5g62340 | invertase/pectin methylesterase inhibitor family protei  | >0.05 | 0.024 | 0.316 | 0.245 | 0.502 | 1.383 |
| 154 | At4g30420 | nodulin MtN21 family protein                             | 0.049 | 0.012 | 0.525 | 0.486 | 0.617 | 1.236 |
| 155 | At3g60550 | CYCP3;2 (cyclin p3;2); cyclin-dependent protein kinase   | 0.033 | 0.013 | 0.517 | 0.474 | 0.727 | 1.292 |
| 156 | At3g45070 | sulfotransferase family protein                          | 0.031 | 0.027 | 0.488 | 0.464 | 0.592 | 1.617 |
| 157 | At2g17070 | similar to unknown protein [Arabidopsis thaliana] (TAI   | >0.05 | 0.039 | 0.471 | 0.579 | 0.493 | 1.410 |
| 158 | At5g40730 | AGP24 (ARABINOGALACTAN PROTEIN 24)                       | 0.038 | 0.003 | 0.585 | 0.490 | 0.976 | 0.761 |
| 159 | At5g56870 | BGAL4 (beta-galactosidase 4); beta-galactosidase         | 0.018 | 0.001 | 0.285 | 0.208 | 0.883 | 0.452 |
| 160 | At1g06120 | fatty acid desaturase family protein                     | >0.05 | 0.003 | 0.409 | 0.347 | 0.809 | 0.587 |
| 161 | At4g14980 | DC1 domain-containing protein                            | 0.026 | 0.008 | 0.532 | 0.355 | 1.241 | 0.696 |
| 162 | At1g25230 | purple acid phosphatase family protein                   | 0.041 | 0.013 | 0.618 | 0.487 | 1.072 | 0.901 |
| 163 | At1g31710 | copper amine oxidase, putative                           | >0.05 | 0.038 | 0.781 | 0.498 | 0.942 | 0.656 |
| 164 | At2g24710 | ATGLR2.3 (Arabidopsis thaliana glutamate receptor 2.3    | >0.05 | 0.038 | 0.599 | 0.235 | 0.755 | 0.536 |
| 165 | At5g15725 | unknown protein                                          | >0.05 | 0.043 | 0.484 | 0.369 | 0.945 | 1.262 |
| 166 | At1g54970 | ATPRP1 (PROLINE-RICH PROTEIN 1); structural constitu     | 0.021 | 0.007 | 0.367 | 0.246 | 0.827 | 1.338 |
| 167 | At1g16370 | ATOCT6; carbohydrate transmembrane transporter/ su       | 0.027 | 0.008 | 0.488 | 0.471 | 0.915 | 1.106 |
| 168 | At4g00680 | actin-depolymerizing factor, putative                    | >0.05 | 0.017 | 0.461 | 0.396 | 0.971 | 0.927 |
| 169 | At4g26010 | peroxidase, putative                                     | 0.041 | 0.011 | 0.436 | 0.349 | 0.876 | 1.081 |
| 170 | At5g04960 | pectinesterase family protein                            | >0.05 | 0.021 | 0.437 | 0.303 | 0.908 | 0.998 |
| 171 | At4g40090 | AGP3 (ARABINOGALACTAN-PROTEIN 3)                         | 0.039 | 0.008 | 0.548 | 0.421 | 0.851 | 1.035 |
| 172 | At1g11655 | similar to unknown protein [Arabidopsis thaliana] (TAI   | >0.05 | 0.025 | 0.325 | 0.198 | 1.036 | 1.109 |
| 173 | At4g34800 | auxin-responsive family protein                          | 0.028 | 0.026 | 0.581 | 0.371 | 1.073 | 1.146 |
| 174 | At5g39320 | UDP-glucose 6-dehydrogenase, putative                    | 0.044 | >0.05 | 0.520 | 0.500 | 1.045 | 1.362 |
| 175 | At1g65310 | ATXTH17 (XYLOGLUCAN ENDOTRANSGLYCOSYLASE/HY              | 0.019 | 0.023 | 0.364 | 0.375 | 1.107 | 1.491 |
| 176 | At4g34580 | transporter                                              | 0.039 | 0.044 | 0.333 | 0.386 | 0.941 | 1.522 |
| 177 | At5g67400 | peroxidase 73 (PER73) (P73) (PRXR11)                     | 0.017 | 0.008 | 0.284 | 0.239 | 1.031 | 1.356 |
| 178 | At2g41970 | protein kinase, putative                                 | 0.031 | 0.026 | 0.421 | 0.445 | 1.074 | 1.220 |
| 179 | At4g02270 | pollen Ole e 1 allergen and extensin family protein      | 0.019 | 0.012 | 0.266 | 0.264 | 1.111 | 1.357 |
| 180 | At3g09925 | pollen Ole e 1 allergen and extensin family protein      | 0.022 | 0.017 | 0.466 | 0.474 | 1.031 | 1.242 |
| 181 | At1g30870 | cationic peroxidase, putative                            | 0.034 | >0.05 | 0.471 | 0.334 | 1.088 | 1.368 |
| 182 | At1g75780 | TUB1 (tubulin beta-1 chain); structural molecule         | 0.000 | 0.009 | 0.620 | 0.451 | 1.041 | 1.335 |
| 183 | At4g25820 | XTR9 (XYLOGLUCAN ENDOTRANSGLYCOSYLASE 9); hyd            | 0.025 | >0.05 | 0.533 | 0.434 | 1.222 | 1.347 |
| 184 | At5g47980 | transferase family protein                               | >0.05 | 0.046 | 0.672 | 0.443 | 0.978 | 0.943 |
| 185 | At4g31250 | leucine-rich repeat transmembrane protein kinase, put    | >0.05 | 0.017 | 0.661 | 0.388 | 0.935 | 0.926 |
| 186 | At2g35990 | similar to carboxy-lyase [Arabidopsis thaliana] (TAIR:AT | 0.040 | 0.012 | 0.689 | 0.221 | 0.981 | 0.728 |
| 187 | At3g09340 | amino acid transporter family protein                    | 0.016 | 0.007 | 0.654 | 0.414 | 0.878 | 1.217 |
| 188 | At4g19030 | NLM1 (NOD26-like intrinsic protein 1;1); water channe    | >0.05 | 0.045 | 0.733 | 0.443 | 0.905 | 1.103 |

|     |           |                                                          |       |       |       |       |       |       |
|-----|-----------|----------------------------------------------------------|-------|-------|-------|-------|-------|-------|
| 189 | At1g24530 | transducin family protein / WD-40 repeat family protei   | 0.008 | 0.004 | 0.827 | 0.457 | 0.976 | 1.118 |
| 190 | At1g34510 | peroxidase, putative                                     | 0.036 | >0.05 | 0.613 | 0.301 | 1.286 | 1.223 |
| 191 | At2g25240 | serine-type endopeptidase inhibitor                      | 0.041 | >0.05 | 0.770 | 0.477 | 1.133 | 0.989 |
| 192 | At5g22410 | peroxidase, putative                                     | 0.009 | >0.05 | 0.483 | 0.302 | 1.599 | 1.758 |
| 193 | At1g13420 | sulfotransferase family protein                          | 0.049 | >0.05 | 0.522 | 0.331 | 1.522 | 1.308 |
| 194 | At4g25790 | allergen V5/Tpx-1-related family protein                 | 0.020 | >0.05 | 0.439 | 0.362 | 1.580 | 1.276 |
| 195 | At1g02810 | pectinesterase family protein                            | 0.031 | >0.05 | 0.449 | 0.451 | 1.502 | 1.097 |
| 196 | At4g21830 | methionine sulfoxide reductase domain-containing prc     | 0.046 | >0.05 | 0.476 | 0.487 | 1.490 | 1.034 |
| 197 | At4g30320 | allergen V5/Tpx-1-related family protein                 | 0.030 | 0.028 | 0.352 | 0.335 | 1.314 | 1.070 |
| 198 | At3g03190 | ATGSTF11 (GLUTATHIONE S-TRANSFERASE F11); glutat         | 0.019 | >0.05 | 0.466 | 0.649 | 1.133 | 1.522 |
| 199 | At3g18000 | NMT1 (N-METHYLTRANSFERASE 1); phosphoethanolan           | 0.015 | >0.05 | 0.416 | 0.469 | 1.516 | 1.472 |
| 200 | At4g29690 | type I phosphodiesterase/nucleotide pyrophosphatase      | 0.044 | >0.05 | 0.351 | 0.446 | 1.354 | 1.691 |
| 201 | At5g20860 | pectinesterase family protein                            | >0.05 | 0.021 | 0.386 | 0.575 | 1.046 | 0.919 |
| 202 | At3g19390 | cysteine proteinase, putative / thiol protease, putative | >0.05 | 0.022 | 0.466 | 0.640 | 0.940 | 0.949 |
| 203 | At1g26250 | proline-rich extensin, putative                          | >0.05 | 0.048 | 0.493 | 0.703 | 0.900 | 0.854 |
| 204 | At5g57625 | allergen V5/Tpx-1-related family protein                 | >0.05 | 0.027 | 0.421 | 0.478 | 0.984 | 0.988 |
| 205 | At3g22710 | F-box family protein                                     | >0.05 | 0.037 | 0.383 | 0.460 | 1.005 | 0.881 |
| 206 | At2g30210 | LAC3 (laccase 3); copper ion binding / oxidoreductase    | 0.031 | 0.010 | 0.351 | 0.380 | 1.115 | 0.940 |
| 207 | At1g62980 | ATEXPA18 (ARABIDOPSIS THALIANA EXPANSIN A18)             | >0.05 | 0.023 | 0.397 | 0.436 | 1.040 | 0.750 |
| 208 | At2g30395 | ATOF17/OFP17 (Arabidopsis thaliana ovate family prc      | >0.05 | 0.047 | 0.394 | 0.454 | 1.153 | 0.760 |
| 209 | At5g38930 | germin-like protein, putative                            | 0.021 | 0.017 | 0.456 | 0.605 | 1.090 | 1.115 |
| 210 | At5g38940 | manganese ion binding / metal ion binding / nutrient r   | 0.019 | 0.021 | 0.389 | 0.585 | 1.165 | 1.149 |
| 211 | At4g30170 | peroxidase, putative                                     | 0.046 | 0.034 | 0.361 | 0.529 | 1.172 | 0.982 |
| 212 | At2g37130 | peroxidase 21 (PER21) (P21) (PRXR5)                      | 0.023 | 0.014 | 0.332 | 0.530 | 0.911 | 1.262 |
| 213 | At1g47840 | hexokinase, putative                                     | >0.05 | 0.027 | 0.468 | 0.835 | 0.888 | 0.875 |
| 214 | At2g21880 | AtRABG2/AtRab7A (Arabidopsis Rab GTPase homolog (        | 0.049 | 0.018 | 0.446 | 0.801 | 0.951 | 0.893 |
| 215 | At5g39240 | similar to unknown protein [Arabidopsis thaliana] (TAII  | 0.044 | >0.05 | 1.004 | 0.496 | 0.825 | 1.177 |
| 216 | At2g43880 | polygalacturonase, putative / pectinase, putative        | 0.046 | >0.05 | 0.906 | 0.401 | 0.807 | 1.458 |
| 217 | At1g51470 | glycosyl hydrolase family 1 protein                      | 0.033 | >0.05 | 0.706 | 0.315 | 0.809 | 2.280 |
| 218 | At2g25160 | CYP82F1 (cytochrome P450, family 82, subfamily F, pol    | 0.015 | 0.020 | 0.761 | 0.430 | 0.676 | 1.554 |
| 219 | At3g62760 | ATGSTF13 (Arabidopsis thaliana Glutathione S-transfer    | 0.050 | >0.05 | 0.535 | 0.306 | 0.652 | 1.731 |
| 220 | At1g16410 | CYP79F1 (SUPERSHOOT 1)                                   | 0.022 | >0.05 | 0.349 | 0.324 | 0.667 | 2.359 |
| 221 | At1g59940 | ARR3 (RESPONSE REGULATOR 3); transcription regulat       | 0.042 | >0.05 | 0.803 | 0.603 | 1.040 | 2.138 |
| 222 | At1g14960 | major latex protein-related / MLP-related                | 0.018 | >0.05 | 0.512 | 0.302 | 1.003 | 2.197 |
| 223 | At3g49960 | peroxidase, putative                                     | 0.026 | >0.05 | 0.570 | 0.402 | 1.156 | 2.335 |
| 224 | At4g38860 | auxin-responsive protein, putative                       | 0.031 | >0.05 | 0.853 | 0.490 | 1.240 | 1.526 |
| 225 | At5g06200 | integral membrane family protein                         | >0.05 | 0.011 | 0.544 | 0.571 | 0.491 | 0.662 |
| 226 | At5g59090 | ATSBT4.12; subtilase                                     | >0.05 | 0.002 | 0.506 | 0.484 | 0.438 | 0.605 |
| 227 | At2g36830 | GAMMA-TIP (Tonoplast intrinsic protein (TIP) gamma);     | >0.05 | 0.001 | 0.408 | 0.404 | 0.334 | 0.530 |
| 228 | At4g15660 | glutaredoxin family protein                              | >0.05 | 0.001 | 0.179 | 0.178 | 0.141 | 0.308 |
| 229 | At4g15690 | glutaredoxin family protein                              | >0.05 | 0.001 | 0.236 | 0.189 | 0.174 | 0.360 |
| 230 | At4g15700 | glutaredoxin family protein                              | >0.05 | 0.001 | 0.272 | 0.214 | 0.208 | 0.375 |
| 231 | At1g73280 | SCPL3 (serine carboxypeptidase-like 3); serine carboxy   | >0.05 | 0.004 | 0.499 | 0.585 | 0.499 | 0.717 |
| 232 | At2g34000 | zinc finger protein-related                              | >0.05 | 0.009 | 0.354 | 0.401 | 0.288 | 0.583 |
| 233 | At3g23730 | xyloglucan:xyloglucosyl transferase, putative / xylogluc | >0.05 | 0.004 | 0.587 | 0.522 | 0.468 | 0.721 |
| 234 | At3g26610 | polygalacturonase, putative / pectinase, putative        | >0.05 | 0.004 | 0.327 | 0.218 | 0.196 | 0.542 |
| 235 | At5g22920 | zinc finger (C3HC4-type RING finger) family protein      | >0.05 | 0.004 | 0.587 | 0.527 | 0.432 | 0.498 |
| 236 | At1g72200 | zinc finger (C3HC4-type RING finger) family protein      | >0.05 | 0.011 | 0.629 | 0.570 | 0.498 | 0.561 |
| 237 | At3g24300 | AMT1;3/ATAMT1;3 (AMMONIUM TRANSPORTER 1;3);              | >0.05 | 0.005 | 0.532 | 0.459 | 0.375 | 0.489 |

|     |           |                                                           |       |       |       |       |       |       |
|-----|-----------|-----------------------------------------------------------|-------|-------|-------|-------|-------|-------|
| 238 | At4g15400 | transferase family protein                                | >0.05 | 0.003 | 0.563 | 0.500 | 0.427 | 0.544 |
| 239 | At3g01190 | peroxidase 27 (PER27) (P27) (PRXR7)                       | >0.05 | 0.001 | 0.234 | 0.246 | 0.188 | 0.288 |
| 240 | At3g48100 | ARR5 (ARABIDOPSIS RESPONSE REGULATOR 5); transcr          | >0.05 | 0.001 | 0.550 | 0.569 | 0.494 | 0.581 |
| 241 | At3g61430 | PIP1A (PLASMA MEMBRANE INTRINSIC PROTEIN 1A); v           | >0.05 | 0.002 | 0.501 | 0.544 | 0.420 | 0.536 |
| 242 | At3g45700 | proton-dependent oligopeptide transport (POT) family      | >0.05 | 0.000 | 0.529 | 0.464 | 0.433 | 0.539 |
| 243 | At4g15680 | glutaredoxin family protein                               | >0.05 | 0.001 | 0.366 | 0.332 | 0.297 | 0.393 |
| 244 | At5g23360 | GRAM domain-containing protein / ABA-responsive pr        | >0.05 | 0.003 | 0.520 | 0.537 | 0.370 | 0.531 |
| 245 | At3g06070 | similar to unknown protein [Arabidopsis thaliana] (TAI    | >0.05 | 0.008 | 0.623 | 0.661 | 0.480 | 0.648 |
| 246 | At5g48430 | aspartic-type endopeptidase/ pepsin A                     | >0.05 | 0.004 | 0.613 | 0.612 | 0.442 | 0.548 |
| 247 | At4g17340 | DELTA-TIP2/TIP2;2 (tonoplast intrinsic protein 2;2); wa   | >0.05 | 0.002 | 0.455 | 0.454 | 0.248 | 0.391 |
| 248 | At4g29905 | similar to unknown protein [Arabidopsis thaliana] (TAI    | >0.05 | 0.002 | 0.374 | 0.434 | 0.223 | 0.346 |
| 249 | At5g65730 | xyloglucan:xyloglucosyl transferase, putative / xylogluc  | >0.05 | 0.004 | 0.412 | 0.515 | 0.352 | 0.571 |
| 250 | At3g55150 | ATEXO70H1 (exocyst subunit EXO70 family protein H1)       | >0.05 | 0.004 | 0.453 | 0.509 | 0.353 | 0.546 |
| 251 | At2g19800 | MIOX2 (MYO-INOSITOL OXYGENASE 2)                          | >0.05 | 0.004 | 0.401 | 0.548 | 0.322 | 0.494 |
| 252 | At4g26260 | MIOX4 (MYO-INOSITOL OXYGENASE 4)                          | >0.05 | 0.007 | 0.276 | 0.464 | 0.295 | 0.430 |
| 253 | At5g15180 | peroxidase, putative                                      | >0.05 | 0.006 | 0.579 | 0.421 | 0.370 | 0.608 |
| 254 | At4g37540 | LBD39 (LOB DOMAIN-CONTAINING PROTEIN 39)                  | >0.05 | 0.003 | 0.692 | 0.532 | 0.482 | 0.697 |
| 255 | At5g15290 | integral membrane family protein                          | >0.05 | 0.012 | 0.522 | 0.359 | 0.322 | 0.524 |
| 256 | At2g33790 | pollen Ole e 1 allergen and extensin family protein       | >0.05 | 0.004 | 0.365 | 0.204 | 0.166 | 0.300 |
| 257 | At3g62950 | glutaredoxin family protein                               | >0.05 | 0.003 | 0.386 | 0.236 | 0.163 | 0.355 |
| 258 | At1g80380 | phosphoribulokinase/uridine kinase-related                | >0.05 | 0.000 | 0.696 | 0.482 | 0.453 | 0.615 |
| 259 | At3g18780 | ACT2 (ACTIN 2); structural constituent of cytoskeleton    | >0.05 | 0.000 | 0.750 | 0.549 | 0.493 | 0.682 |
| 260 | At2g02610 | DC1 domain-containing protein                             | >0.05 | 0.003 | 0.621 | 0.476 | 0.353 | 0.548 |
| 261 | At4g22460 | protease inhibitor/seed storage/lipid transfer protein (  | >0.05 | 0.005 | 0.596 | 0.454 | 0.352 | 0.474 |
| 262 | At5g20250 | DIN10 (DARK INDUCIBLE 10); hydrolase, hydrolyzing O-      | >0.05 | 0.002 | 0.530 | 0.339 | 0.368 | 0.508 |
| 263 | At1g13300 | myb family transcription factor                           | >0.05 | 0.013 | 0.623 | 0.473 | 0.501 | 0.562 |
| 264 | At1g55380 | DC1 domain-containing protein                             | >0.05 | 0.049 | 0.709 | 0.493 | 0.494 | 0.563 |
| 265 | At2g38080 | IRX12/LAC4 (laccase 4); copper ion binding / oxidoredu    | >0.05 | 0.008 | 0.602 | 0.347 | 0.388 | 0.454 |
| 266 | At3g30775 | ERD5 (EARLY RESPONSIVE TO DEHYDRATION 5); prolin          | >0.05 | 0.002 | 0.602 | 0.371 | 0.424 | 0.500 |
| 267 | At5g19190 | similar to unknown protein [Arabidopsis thaliana] (TAI    | >0.05 | 0.002 | 0.672 | 0.449 | 0.385 | 0.468 |
| 268 | At3g48360 | BT2 (BTB AND TAZ DOMAIN PROTEIN 2); protein bindir        | >0.05 | 0.002 | 0.678 | 0.285 | 0.260 | 0.338 |
| 269 | At4g19690 | IRT1 (IRON-REGULATED TRANSPORTER 1); cadmium ion          | >0.05 | 0.001 | 0.601 | 0.275 | 0.270 | 0.301 |
| 270 | At3g13750 | BGAL1 (BETA GALACTOSIDASE 1); beta-galactosidase          | >0.05 | 0.002 | 0.807 | 0.482 | 0.562 | 0.560 |
| 271 | At5g21940 | similar to unknown protein [Arabidopsis thaliana] (TAI    | >0.05 | 0.004 | 0.691 | 0.581 | 0.390 | 0.656 |
| 272 | At1g49500 | similar to unknown protein [Arabidopsis thaliana] (TAI    | >0.05 | 0.008 | 0.690 | 0.580 | 0.390 | 0.648 |
| 273 | At3g02850 | SKOR (stelar K+ outward rectifier); cyclic nucleotide bir | >0.05 | 0.014 | 0.557 | 0.416 | 0.204 | 0.443 |
| 274 | At4g17460 | HAT1 (homeobox-leucine zipper protein 1); DNA bindir      | >0.05 | 0.006 | 0.724 | 0.676 | 0.459 | 0.682 |
| 275 | At3g06080 | similar to unknown protein [Arabidopsis thaliana] (TAI    | >0.05 | 0.007 | 0.745 | 0.624 | 0.421 | 0.726 |
| 276 | At1g22230 | similar to unknown protein [Arabidopsis thaliana] (TAI    | >0.05 | 0.028 | 0.782 | 0.612 | 0.479 | 0.693 |
| 277 | At5g25810 | TNY (TINY); DNA binding / transcription factor            | >0.05 | 0.002 | 0.538 | 0.298 | 0.176 | 0.340 |
| 278 | At3g05950 | germin-like protein, putative                             | >0.05 | 0.004 | 0.669 | 0.430 | 0.260 | 0.470 |
| 279 | At1g63180 | UGE3 (UDP-D-GLUCOSE/UDP-D-GALACTOSE 4-EPIMER/             | >0.05 | 0.022 | 0.779 | 0.635 | 0.482 | 0.621 |
| 280 | At3g16690 | nodulin MtN3 family protein                               | >0.05 | 0.016 | 0.782 | 0.546 | 0.433 | 0.550 |
| 281 | At3g57520 | ATSIP2 (ARABIDOPSIS THALIANA SEED IMBIBITION 2); I        | >0.05 | 0.000 | 0.739 | 0.529 | 0.414 | 0.542 |
| 282 | At1g72610 | GLP1 (GERMIN-LIKE PROTEIN 1); manganese ion bindin        | >0.05 | 0.006 | 0.831 | 0.579 | 0.427 | 0.582 |
| 283 | At5g06570 | hydrolase                                                 | >0.05 | 0.017 | 0.494 | 0.750 | 0.328 | 0.435 |
| 284 | At3g25190 | nodulin, putative                                         | >0.05 | 0.005 | 0.588 | 0.829 | 0.470 | 0.516 |
| 285 | At5g17300 | myb family transcription factor                           | >0.05 | 0.011 | 0.653 | 0.765 | 0.431 | 0.517 |
| 286 | At4g04840 | methionine sulfoxide reductase domain-containing prc      | 0.028 | 0.001 | 0.407 | 0.660 | 0.196 | 0.261 |

|     |           |                                                          |       |       |       |       |       |       |
|-----|-----------|----------------------------------------------------------|-------|-------|-------|-------|-------|-------|
| 287 | At4g08360 | KOW domain-containing protein                            | >0.05 | 0.008 | 0.462 | 0.672 | 0.244 | 0.301 |
| 288 | At2g22630 | AGL17 (AGAMOUS-LIKE 17); transcription factor            | >0.05 | 0.002 | 0.495 | 0.805 | 0.274 | 0.340 |
| 289 | At1g70970 | F-box family protein                                     | >0.05 | 0.002 | 0.454 | 0.698 | 0.372 | 0.434 |
| 290 | At3g45690 | proton-dependent oligopeptide transport (POT) family     | >0.05 | 0.005 | 0.583 | 0.766 | 0.500 | 0.586 |
| 291 | At4g18940 | cyclic phosphodiesterase, putative                       | >0.05 | 0.003 | 0.415 | 0.786 | 0.404 | 0.473 |
| 292 | At5g14070 | ROXY2; thiol-disulfide exchange intermediate             | >0.05 | 0.019 | 0.526 | 0.573 | 0.353 | 0.441 |
| 293 | At4g30450 | glycine-rich protein                                     | >0.05 | 0.002 | 0.515 | 0.604 | 0.357 | 0.440 |
| 294 | At5g41080 | glycerophosphoryl diester phosphodiesterase family pr    | >0.05 | 0.001 | 0.575 | 0.551 | 0.348 | 0.454 |
| 295 | At1g22740 | RAB7 (Ras-related protein 7); GTP binding                | >0.05 | 0.005 | 0.676 | 0.668 | 0.484 | 0.540 |
| 296 | At1g30840 | ATPUP4 (Arabidopsis thaliana purine permease 4); puri    | >0.05 | 0.002 | 0.589 | 0.691 | 0.461 | 0.477 |
| 297 | At5g43350 | ATPT1 (PHOSPHATE TRANSPORTER 1); carbohydrate tr         | >0.05 | 0.002 | 0.552 | 0.597 | 0.398 | 0.411 |
| 298 | At1g70850 | MLP34 (MLP-LIKE PROTEIN 34)                              | >0.05 | 0.031 | 0.619 | 0.688 | 0.495 | 0.497 |
| 299 | At5g43370 | APT1/PHT1;2/PHT2 (PHOSPHATE TRANSPORTER 2); car          | >0.05 | 0.002 | 0.565 | 0.653 | 0.450 | 0.428 |
| 300 | At2g01880 | ATPAP7/PAP7 (purple acid phosphatase 7); acid phosph     | >0.05 | 0.003 | 0.606 | 0.712 | 0.446 | 0.503 |
| 301 | At1g30360 | ERD4 (EARLY-RESPONSIVE TO DEHYDRATION 4)                 | >0.05 | 0.001 | 0.702 | 0.624 | 0.436 | 0.530 |
| 302 | At2g18700 | ATTPS11 (Arabidopsis thaliana trehalose phosphatase/     | >0.05 | 0.008 | 0.724 | 0.646 | 0.456 | 0.595 |
| 303 | At2g01530 | MLP329 (MLP-LIKE PROTEIN 329)                            | >0.05 | 0.003 | 0.578 | 0.540 | 0.280 | 0.411 |
| 304 | At1g11380 | similar to unknown protein [Arabidopsis thaliana] (TAI   | >0.05 | 0.014 | 0.702 | 0.704 | 0.464 | 0.586 |
| 305 | At1g66230 | MYB20 (myb domain protein 20); DNA binding / transc      | >0.05 | 0.011 | 0.670 | 0.655 | 0.391 | 0.463 |
| 306 | At1g73165 | CLE1 (CLAVATA3/ESR-RELATED 1); receptor binding          | >0.05 | 0.034 | 0.520 | 0.441 | 0.143 | 0.273 |
| 307 | At5g48010 | pentacyclic triterpene synthase, putative                | >0.05 | 0.016 | 0.666 | 0.768 | 0.493 | 0.701 |
| 308 | At4g39070 | zinc finger (B-box type) family protein                  | >0.05 | 0.007 | 0.500 | 0.574 | 0.249 | 0.521 |
| 309 | At1g67710 | ARR11 (RESPONSE REGULATOR 11); transcription facto       | >0.05 | 0.008 | 0.686 | 0.735 | 0.499 | 0.656 |
| 310 | At1g74760 | zinc finger (C3HC4-type RING finger) family protein cor  | >0.05 | 0.002 | 0.564 | 0.524 | 0.246 | 0.445 |
| 311 | At4g37410 | CYP81F4 (cytochrome P450, family 81, subfamily F, pol    | >0.05 | 0.004 | 0.641 | 0.685 | 0.383 | 0.588 |
| 312 | At3g61060 | ATPP2-A13                                                | >0.05 | 0.004 | 0.565 | 0.696 | 0.309 | 0.492 |
| 313 | At5g24410 | glucosamine/galactosamine-6-phosphate isomerase-re       | >0.05 | 0.001 | 0.379 | 0.414 | 0.312 | 0.320 |
| 314 | At5g47450 | AtTIP2;3 (Arabidopsis thaliana tonoplast intrinsic prote | >0.05 | 0.002 | 0.261 | 0.288 | 0.164 | 0.152 |
| 315 | At3g45710 | proton-dependent oligopeptide transport (POT) family     | >0.05 | 0.001 | 0.532 | 0.526 | 0.393 | 0.412 |
| 316 | At5g63160 | BT1 (BTB and TAZ domain protein 1); protein binding /    | >0.05 | 0.003 | 0.590 | 0.556 | 0.513 | 0.418 |
| 317 | At3g46880 | similar to unknown protein [Arabidopsis thaliana] (TAI   | >0.05 | 0.004 | 0.663 | 0.580 | 0.554 | 0.494 |
| 318 | At4g12545 | protease inhibitor/seed storage/lipid transfer protein ( | >0.05 | 0.001 | 0.291 | 0.247 | 0.175 | 0.149 |
| 319 | At2g42170 | actin, putative                                          | >0.05 | 0.012 | 0.680 | 0.577 | 0.465 | 0.507 |
| 320 | At3g01760 | lysine and histidine specific transporter, putative      | >0.05 | 0.043 | 0.585 | 0.469 | 0.461 | 0.455 |
| 321 | At1g02640 | BXL2 (BETA-XYLOSIDASE 2); hydrolase, hydrolyzing O-g     | >0.05 | 0.030 | 0.601 | 0.433 | 0.482 | 0.429 |
| 322 | At1g76410 | ATL8; protein binding / zinc ion binding                 | >0.05 | 0.005 | 0.609 | 0.523 | 0.416 | 0.349 |
| 323 | At4g12550 | AIR1 (Auxin-Induced in Root cultures 1); lipid binding   | >0.05 | 0.004 | 0.513 | 0.449 | 0.340 | 0.251 |
| 324 | At4g37700 | similar to unknown protein [Arabidopsis thaliana] (TAI   | >0.05 | 0.001 | 0.453 | 0.468 | 0.254 | 0.201 |
| 325 | At2g22122 | unknown protein                                          | >0.05 | 0.001 | 0.577 | 0.354 | 0.319 | 0.221 |
| 326 | At1g14185 | glucose-methanol-choline (GMC) oxidoreductase famil      | >0.05 | 0.018 | 0.719 | 0.585 | 0.579 | 0.444 |
| 327 | At1g33055 | unknown protein                                          | >0.05 | 0.004 | 0.401 | 0.475 | 0.453 | 0.319 |
| 328 | At1g05650 | polygalacturonase, putative / pectinase, putative        | >0.05 | 0.034 | 0.544 | 0.591 | 0.572 | 0.429 |
| 329 | At2g04800 | unknown protein                                          | >0.05 | 0.008 | 0.604 | 0.705 | 0.666 | 0.491 |
| 330 | At4g39675 | unknown protein                                          | >0.05 | 0.001 | 0.252 | 0.394 | 0.319 | 0.134 |
| 331 | At1g78120 | tetratricopeptide repeat (TPR)-containing protein        | >0.05 | 0.003 | 0.452 | 0.627 | 0.409 | 0.413 |
| 332 | At2g37750 | unknown protein                                          | >0.05 | 0.002 | 0.393 | 0.530 | 0.396 | 0.329 |
| 333 | At1g01580 | FRO2 (FERRIC REDUCTION OXIDASE 2); ferric-chelate re     | >0.05 | 0.013 | 0.591 | 0.682 | 0.537 | 0.334 |
| 334 | At1g07610 | MT1C (metallothionein 1C)                                | >0.05 | 0.005 | 0.562 | 0.686 | 0.524 | 0.389 |
| 335 | At4g24015 | zinc finger (RING-H2 type) protein-related               | >0.05 | 0.002 | 0.583 | 0.703 | 0.510 | 0.420 |

|     |             |                                                          |       |       |       |       |       |       |
|-----|-------------|----------------------------------------------------------|-------|-------|-------|-------|-------|-------|
| 336 | At1g31050   | transcription factor                                     | >0.05 | 0.023 | 0.552 | 0.691 | 0.447 | 0.754 |
| 337 | At1g07560   | leucine-rich repeat protein kinase, putative             | >0.05 | 0.022 | 0.487 | 0.681 | 0.445 | 0.683 |
| 338 | At2g14160   | nucleic acid binding                                     | >0.05 | 0.010 | 0.390 | 0.654 | 0.395 | 0.765 |
| 339 | At4g15670   | glutaredoxin family protein                              | >0.05 | 0.006 | 0.292 | 0.528 | 0.267 | 0.660 |
| 340 | At3g05890   | RCI2B (RARE-COLD-INDUCIBLE 2B)                           | >0.05 | 0.006 | 0.539 | 0.756 | 0.498 | 0.792 |
| 341 | At3g51910   | AT-HSFA7A (Arabidopsis thaliana heat shock transcript    | >0.05 | 0.016 | 0.555 | 0.762 | 0.391 | 0.658 |
| 342 | At5g03310   | auxin-responsive family protein                          | >0.05 | 0.007 | 0.478 | 0.782 | 0.446 | 0.670 |
| 343 | At5g03570   | iron-responsive transporter-related                      | >0.05 | 0.008 | 0.350 | 0.764 | 0.264 | 0.461 |
| 344 | At5g42580   | CYP705A12 (cytochrome P450, family 705, subfamily A      | >0.05 | 0.017 | 0.410 | 0.807 | 0.619 | 0.701 |
| 345 | At1g49030   | similar to unknown protein [Arabidopsis thaliana] (TAI   | >0.05 | 0.002 | 0.286 | 0.592 | 0.405 | 0.396 |
| 346 | At2g01900   | endonuclease/exonuclease/phosphatase family protei       | >0.05 | 0.004 | 0.319 | 0.633 | 0.376 | 0.435 |
| 347 | At4g15340   | ATPEN1 (Arabidopsis thaliana pentacyclic triterpene sy   | >0.05 | 0.002 | 0.224 | 0.473 | 0.374 | 0.495 |
| 348 | At4g38390   | similar to unknown protein [Arabidopsis thaliana] (TAI   | >0.05 | 0.008 | 0.447 | 0.654 | 0.649 | 0.613 |
| 349 | At5g09530   | hydroxyproline-rich glycoprotein family protein          | >0.05 | 0.006 | 0.686 | 0.411 | 0.494 | 0.627 |
| 350 | At1g50560   | CYP705A25 (cytochrome P450, family 705, subfamily A      | >0.05 | 0.011 | 0.776 | 0.498 | 0.610 | 0.739 |
| 351 | At2g37440   | endonuclease/exonuclease/phosphatase family protei       | >0.05 | 0.026 | 0.745 | 0.399 | 0.582 | 0.625 |
| 352 | At1g45015   | MD-2-related lipid recognition domain-containing prot    | >0.05 | 0.013 | 0.511 | 0.253 | 0.407 | 0.626 |
| 353 | At3g22970   | similar to unknown protein [Arabidopsis thaliana] (TAI   | >0.05 | 0.039 | 0.723 | 0.454 | 0.594 | 0.810 |
| 354 | At2g42870   | HLH1/PAR1 (PHY RAPIDLY REGULATED 1); transcriptior       | >0.05 | 0.030 | 0.695 | 0.408 | 0.498 | 0.743 |
| 355 | At5g18600   | glutaredoxin family protein                              | >0.05 | 0.003 | 0.430 | 0.319 | 0.467 | 0.593 |
| 356 | At5g53250   | AGP22/ATAGP22 (ARABINOGALACTAN PROTEINS 22)              | >0.05 | 0.001 | 0.273 | 0.158 | 0.274 | 0.420 |
| 357 | At4g12510   | protease inhibitor/seed storage/lipid transfer protein ( | >0.05 | 0.004 | 0.318 | 0.189 | 0.310 | 0.470 |
| 358 | At4g12520   | protease inhibitor/seed storage/lipid transfer protein ( | >0.05 | 0.004 | 0.330 | 0.220 | 0.317 | 0.465 |
| 359 | At1g19900   | glyoxal oxidase-related                                  | >0.05 | 0.012 | 0.351 | 0.262 | 0.364 | 0.474 |
| 360 | At4g15290   | ATCSLB05 (Cellulose synthase-like B5); transferase/ tra  | >0.05 | 0.005 | 0.395 | 0.310 | 0.402 | 0.517 |
| 361 | At5g19970   | similar to unnamed protein product [Vitis vinifera] (GB  | >0.05 | 0.012 | 0.561 | 0.360 | 0.507 | 0.585 |
| 362 | At1g52750   | hydrolase, alpha/beta fold family protein                | >0.05 | 0.010 | 0.592 | 0.454 | 0.537 | 0.655 |
| 363 | At4g26320   | AGP13 (ARABINOGALACTAN PROTEIN 13)                       | >0.05 | 0.001 | 0.208 | 0.097 | 0.188 | 0.284 |
| 364 | At1g12080   | contains domain PTHR22683 (PTHR22683)                    | >0.05 | 0.003 | 0.557 | 0.318 | 0.482 | 0.608 |
| 365 | At4g34790   | auxin-responsive family protein                          | >0.05 | 0.006 | 0.569 | 0.372 | 0.532 | 0.645 |
| 366 | At3g59370   | contains domain PTHR22683 (PTHR22683)                    | >0.05 | 0.004 | 0.403 | 0.221 | 0.363 | 0.544 |
| 367 | At3g25790   | myb family transcription factor                          | >0.05 | 0.004 | 0.624 | 0.434 | 0.619 | 0.675 |
| 368 | At5g24100   | leucine-rich repeat transmembrane protein kinase, put    | >0.05 | 0.012 | 0.529 | 0.393 | 0.497 | 0.760 |
| 369 | At5g56540   | AGP14 (ARABINOGALACTAN PROTEIN 14)                       | >0.05 | 0.004 | 0.407 | 0.248 | 0.405 | 0.626 |
| 370 | At3g56000   | ATCSLA14 (Cellulose synthase-like A14); transferase, tr  | >0.05 | 0.002 | 0.511 | 0.357 | 0.442 | 0.672 |
| 371 | At5g44020   | acid phosphatase class B family protein                  | >0.05 | 0.001 | 0.585 | 0.333 | 0.612 | 0.537 |
| 372 | At4g25250   | invertase/pectin methylesterase inhibitor family protei  | >0.05 | 0.018 | 0.676 | 0.473 | 0.736 | 0.624 |
| 373 | At4g18510   | CLE2 (CLAVATA3/ESR-RELATED); receptor binding            | >0.05 | 0.001 | 0.284 | 0.151 | 0.399 | 0.397 |
| 374 | ath-MIR169a | miRNA gene Arabidopsis thaliana miR169a stem-loop        | >0.05 | 0.010 | 0.619 | 0.423 | 0.583 | 0.542 |
| 375 | At2g28270   | DC1 domain-containing protein                            | >0.05 | 0.046 | 0.617 | 0.425 | 0.586 | 0.549 |
| 376 | At1g16390   | ATOCT3 (ARABIDOPSIS THALIANA ORGANIC CATION/C            | >0.05 | 0.001 | 0.576 | 0.441 | 0.519 | 0.506 |
| 377 | At5g14750   | ATMYB66/WER/WER1 (WEREWOLF 1); DNA binding / r           | >0.05 | 0.006 | 0.520 | 0.479 | 0.666 | 0.737 |
| 378 | At1g03700   | integral membrane family protein                         | >0.05 | 0.009 | 0.547 | 0.495 | 0.711 | 0.751 |
| 379 | At2g19660   | DC1 domain-containing protein                            | >0.05 | 0.022 | 0.585 | 0.495 | 0.695 | 0.752 |
| 380 | At5g42785   | unknown protein                                          | >0.05 | 0.004 | 0.350 | 0.348 | 0.543 | 0.662 |
| 381 | At3g18450   | similar to unknown protein [Arabidopsis thaliana] (TAI   | >0.05 | 0.007 | 0.170 | 0.176 | 0.380 | 0.496 |
| 382 | At5g49360   | BXL1 (BETA-XYLOSIDASE 1); hydrolase, hydrolyzing O-g     | >0.05 | 0.009 | 0.358 | 0.391 | 0.561 | 0.657 |
| 383 | At5g64100   | peroxidase, putative                                     | >0.05 | 0.002 | 0.367 | 0.389 | 0.530 | 0.546 |
| 384 | At4g35100   | PIP3 (PLASMA MEMBRANE INTRINSIC PROTEIN 3); wat          | >0.05 | 0.001 | 0.499 | 0.527 | 0.611 | 0.675 |



|     |           |                                                          |       |       |       |       |       |       |
|-----|-----------|----------------------------------------------------------|-------|-------|-------|-------|-------|-------|
| 385 | At2g30930 | similar to unknown protein [Arabidopsis thaliana] (TAIR) | >0.05 | 0.004 | 0.414 | 0.473 | 0.597 | 0.683 |
| 386 | At4g22210 | LCR85 (Low-molecular-weight cysteine-rich 85)            | >0.05 | 0.006 | 0.362 | 0.400 | 0.537 | 0.599 |
| 387 | At5g17820 | peroxidase 57 (PER57) (P57) (PRXR10)                     | >0.05 | 0.003 | 0.487 | 0.391 | 0.759 | 0.670 |
| 388 | At4g08620 | SULTR1;1 (sulfate transporter 1;1); sulfate transmembr   | >0.05 | 0.004 | 0.494 | 0.440 | 0.713 | 0.584 |
| 389 | At5g36180 | SCPL1 (serine carboxypeptidase-like 1); serine carboxyl  | >0.05 | 0.002 | 0.418 | 0.461 | 0.448 | 0.771 |
| 390 | At1g62320 | early-responsive to dehydration protein-related / ERD    | >0.05 | 0.008 | 0.398 | 0.466 | 0.464 | 0.682 |
| 391 | At4g33610 | glycine-rich protein                                     | >0.05 | 0.041 | 0.446 | 0.604 | 0.496 | 0.735 |
| 392 | At5g38450 | CYP735A1 (cytochrome P450, family 735, subfamily A,      | >0.05 | 0.001 | 0.315 | 0.423 | 0.482 | 0.349 |
| 393 | At2g18800 | xyloglucan:xyloglucosyl transferase, putative / xylogluc | >0.05 | 0.008 | 0.453 | 0.500 | 0.598 | 0.432 |
| 394 | At4g22212 | similar to LCR85 (Low-molecular-weight cysteine-rich 8   | >0.05 | 0.002 | 0.309 | 0.388 | 0.496 | 0.303 |
| 395 | At2g37180 | RD28 (plasma membrane intrinsic protein 2;3); water c    | >0.05 | 0.001 | 0.388 | 0.464 | 0.479 | 0.401 |
| 396 | At3g13760 | DC1 domain-containing protein                            | >0.05 | 0.004 | 0.468 | 0.532 | 0.532 | 0.464 |
| 397 | At2g44380 | DC1 domain-containing protein                            | >0.05 | 0.002 | 0.398 | 0.475 | 0.481 | 0.485 |
| 398 | At1g23870 | ATPS9 (Arabidopsis thaliana trehalose-phosphatase/s      | >0.05 | 0.002 | 0.467 | 0.531 | 0.516 | 0.510 |
| 399 | At4g13620 | AP2 domain-containing transcription factor, putative     | >0.05 | 0.021 | 0.465 | 0.586 | 0.574 | 0.568 |
| 400 | At5g46890 | protease inhibitor/seed storage/lipid transfer protein ( | >0.05 | 0.003 | 0.342 | 0.262 | 0.394 | 0.360 |
| 401 | At5g47950 | transferase family protein                               | >0.05 | 0.004 | 0.360 | 0.290 | 0.397 | 0.365 |
| 402 | At4g37220 | stress-responsive protein, putative                      | >0.05 | 0.011 | 0.400 | 0.409 | 0.531 | 0.464 |
| 403 | At1g01620 | PIP1C (PLASMA MEMBRANE INTRINSIC PROTEIN 1;3); v         | >0.05 | 0.001 | 0.451 | 0.491 | 0.544 | 0.615 |
| 404 | At2g37170 | PIP2B (plasma membrane intrinsic protein 2;2); water c   | >0.05 | 0.000 | 0.352 | 0.391 | 0.433 | 0.500 |
| 405 | At3g49330 | invertase/pectin methylesterase inhibitor family protei  | >0.05 | 0.002 | 0.442 | 0.463 | 0.502 | 0.545 |
| 406 | At1g15040 | glutamine amidotransferase-related                       | >0.05 | 0.002 | 0.424 | 0.501 | 0.580 | 0.543 |
| 407 | At3g11385 | DC1 domain-containing protein                            | >0.05 | 0.007 | 0.300 | 0.430 | 0.457 | 0.487 |
| 408 | At1g33700 | catalytic                                                | >0.05 | 0.008 | 0.395 | 0.407 | 0.597 | 0.518 |
| 409 | At4g22230 | similar to unknown protein [Arabidopsis thaliana] (TAIR) | >0.05 | 0.000 | 0.219 | 0.286 | 0.460 | 0.344 |
| 410 | At3g22570 | protease inhibitor/seed storage/lipid transfer protein ( | >0.05 | 0.004 | 0.308 | 0.445 | 0.582 | 0.449 |
| 411 | At2g22330 | CYP79B3 (cytochrome P450, family 79, subfamily B, po     | >0.05 | 0.002 | 0.429 | 0.493 | 0.757 | 0.563 |
| 412 | At5g07190 | ATS3 (ARABIDOPSIS THALIANA SEED GENE 3)                  | >0.05 | 0.031 | 0.724 | 0.490 | 0.366 | 1.272 |
| 413 | At5g08250 | cytochrome P450 family protein                           | >0.05 | 0.038 | 0.655 | 0.567 | 0.463 | 0.856 |
| 414 | At3g45720 | proton-dependent oligopeptide transport (POT) family     | >0.05 | 0.007 | 0.642 | 0.483 | 0.423 | 0.860 |
| 415 | At3g50120 | similar to unknown protein [Arabidopsis thaliana] (TAIR) | >0.05 | 0.006 | 0.649 | 0.526 | 0.442 | 0.895 |
| 416 | At5g61440 | thioredoxin family protein                               | >0.05 | 0.002 | 0.662 | 0.446 | 0.424 | 0.783 |
| 417 | At5g35940 | jacalin lectin family protein                            | >0.05 | 0.008 | 0.471 | 0.305 | 0.365 | 0.767 |
| 418 | At1g75750 | GASA1 (GAST1 PROTEIN HOMOLOG 1)                          | >0.05 | 0.014 | 0.526 | 0.352 | 0.400 | 0.840 |
| 419 | At2g39040 | peroxidase, putative                                     | >0.05 | 0.008 | 0.461 | 0.326 | 0.358 | 0.834 |
| 420 | At2g23130 | AGP17 (ARABINOGALACTAN PROTEIN 17)                       | >0.05 | 0.006 | 0.491 | 0.429 | 0.376 | 1.090 |
| 421 | At3g62570 | DNAJ heat shock N-terminal domain-containing protei      | 0.029 | 0.003 | 0.562 | 0.522 | 0.375 | 1.102 |
| 422 | At5g24030 | SLAH3 (SLAC1 HOMOLOGUE 3); transporter                   | >0.05 | 0.017 | 0.747 | 0.671 | 0.350 | 0.949 |
| 423 | At2g05540 | glycine-rich protein                                     | >0.05 | 0.019 | 0.761 | 0.698 | 0.397 | 0.956 |
| 424 | At1g64780 | ATAMT1;2 (AMMONIUM TRANSPORTER 1;2); ammoni              | >0.05 | 0.013 | 0.749 | 0.682 | 0.308 | 0.865 |
| 425 | At2g07678 | Identical to Uncharacterized mitochondrial protein AtM   | >0.05 | 0.041 | 0.805 | 0.708 | 0.487 | 1.027 |
| 426 | At5g02350 | DC1 domain-containing protein                            | >0.05 | 0.019 | 0.608 | 0.506 | 0.282 | 1.086 |
| 427 | At2g30520 | RPT2 (ROOT PHOTOTROPISM 2); protein binding              | >0.05 | 0.011 | 0.666 | 0.678 | 0.426 | 1.013 |
| 428 | At1g22460 | similar to unknown protein [Arabidopsis thaliana] (TAIR) | >0.05 | 0.044 | 0.648 | 0.774 | 0.411 | 1.022 |
| 429 | At5g44110 | POP1                                                     | >0.05 | 0.007 | 0.651 | 0.738 | 0.457 | 0.912 |
| 430 | At1g68440 | similar to unknown protein [Arabidopsis thaliana] (TAIR) | >0.05 | 0.007 | 0.682 | 0.772 | 0.452 | 0.894 |
| 431 | At1g21910 | AP2 domain-containing transcription factor family prot   | >0.05 | 0.026 | 0.612 | 0.714 | 0.424 | 0.788 |
| 432 | At2g20670 | similar to unknown protein [Arabidopsis thaliana] (TAIR) | >0.05 | 0.006 | 0.564 | 0.547 | 0.259 | 0.677 |
| 433 | At1g02660 | lipase class 3 family protein                            | >0.05 | 0.010 | 0.706 | 0.636 | 0.446 | 0.831 |

|     |            |                                                                    |       |       |       |       |       |       |
|-----|------------|--------------------------------------------------------------------|-------|-------|-------|-------|-------|-------|
| 434 | At5g44130  | FLA13 (FASCICLIN-LIKE ARABINO GALACTAN PROTEIN 1                   | >0.05 | 0.007 | 0.812 | 0.457 | 0.315 | 0.781 |
| 435 | At4g04850  | KEA3 (K <sup>+</sup> efflux antiporter 3); potassium:hydrogen anti | >0.05 | 0.012 | 0.840 | 0.557 | 0.435 | 0.872 |
| 436 | At1g12740  | CYP87A2 (cytochrome P450, family 87, subfamily A, po               | >0.05 | 0.007 | 0.728 | 0.383 | 0.284 | 0.764 |
| 437 | At2g28190  | CSD2 (COPPER/ZINC SUPEROXIDE DISMUTASE 2); copp                    | >0.05 | 0.004 | 0.833 | 0.569 | 0.497 | 0.865 |
| 438 | At5g53500  | WD-40 repeat family protein                                        | 0.017 | 0.001 | 0.918 | 0.549 | 0.424 | 0.813 |
| 439 | At2g32740  | exostosin family protein                                           | >0.05 | 0.019 | 0.933 | 0.473 | 0.395 | 0.829 |
| 440 | At1g33340  | epsin N-terminal homology (ENTH) domain-containing                 | >0.05 | 0.019 | 0.849 | 0.560 | 0.408 | 0.746 |
| 441 | At2g40230  | transferase family protein                                         | >0.05 | 0.003 | 0.723 | 0.461 | 0.279 | 0.681 |
| 442 | At1g14430  | glyoxal oxidase-related                                            | >0.05 | 0.027 | 0.838 | 0.625 | 0.485 | 0.771 |
| 443 | At1g72430  | auxin-responsive protein-related                                   | >0.05 | 0.008 | 0.861 | 0.625 | 0.463 | 0.714 |
| 444 | At1g19510  | myb family transcription factor                                    | >0.05 | 0.010 | 0.818 | 0.592 | 0.372 | 0.837 |
| 445 | At2g25430  | epsin N-terminal homology (ENTH) domain-containing                 | >0.05 | 0.044 | 1.105 | 0.447 | 0.386 | 0.826 |
| 446 | At4g34620  | SSR16 (ribosomal protein S16); structural constituent c            | 0.035 | 0.004 | 1.028 | 0.569 | 0.484 | 0.766 |
| 447 | At3g16880  | F-box protein-related                                              | 0.031 | 0.007 | 0.991 | 0.309 | 0.304 | 0.869 |
| 448 | At1g06830  | glutaredoxin family protein                                        | >0.05 | 0.014 | 0.975 | 0.477 | 0.657 | 0.705 |
| 449 | At2g40670  | ARR16 (response regulator 16); transcription regulator,            | >0.05 | 0.050 | 0.999 | 0.402 | 0.553 | 0.880 |
| 450 | At3g09580  | amine oxidase family protein                                       | >0.05 | 0.020 | 0.980 | 0.493 | 0.683 | 0.899 |
| 451 | At3g50780  | protein binding                                                    | >0.05 | 0.040 | 0.841 | 0.468 | 0.699 | 0.862 |
| 452 | At4g29800  | PLA IVD/PLP8 (Patatin-like protein 8)                              | >0.05 | 0.015 | 0.721 | 0.322 | 0.498 | 0.755 |
| 453 | At3g24260  | similar to unknown protein [Arabidopsis thaliana] (TAIR            | >0.05 | 0.038 | 1.545 | 0.328 | 0.348 | 0.605 |
| 454 | At5g08150  | unknown protein                                                    | >0.05 | 0.019 | 0.802 | 0.836 | 0.460 | 0.632 |
| 455 | At3g23530  | cyclopropane fatty acid synthase, putative / CPA-FA sy             | >0.05 | 0.007 | 0.863 | 0.799 | 0.456 | 0.617 |
| 456 | At3g56980  | BHLH039/ORG3 (OBP3-RESPONSIVE GENE 3); DNA binc                    | >0.05 | 0.012 | 0.770 | 0.721 | 0.241 | 0.406 |
| 457 | At5g25240  | similar to NHL repeat-containing protein [Arabidopsis t            | >0.05 | 0.042 | 0.841 | 0.756 | 0.473 | 0.568 |
| 458 | At3g59340  | similar to unknown protein [Arabidopsis thaliana] (TAIR            | >0.05 | 0.002 | 0.764 | 0.725 | 0.351 | 0.478 |
| 459 | At1g04240  | SHY2 (SHORT HYPOCOTYL 2); transcription factor                     | 0.041 | 0.001 | 0.730 | 0.574 | 0.270 | 0.448 |
| 460 | At3g19680  | similar to unknown protein [Arabidopsis thaliana] (TAIR            | >0.05 | 0.017 | 0.854 | 0.705 | 0.448 | 0.612 |
| 461 | At1g54740  | similar to structural constituent of ribosome [Arabidop            | >0.05 | 0.005 | 0.854 | 0.737 | 0.431 | 0.612 |
| 462 | At2g39570  | ACT domain-containing protein                                      | >0.05 | 0.003 | 0.791 | 0.671 | 0.405 | 0.625 |
| 463 | At5g01015  | similar to unknown protein [Arabidopsis thaliana] (TAIR            | >0.05 | 0.014 | 0.793 | 0.632 | 0.410 | 0.633 |
| 464 | At1g03440  | leucine-rich repeat family protein                                 | 0.030 | 0.003 | 0.847 | 0.754 | 0.393 | 0.717 |
| 465 | At2g28305  | similar to unknown protein [Arabidopsis thaliana] (TAIR            | 0.032 | 0.002 | 0.803 | 0.721 | 0.316 | 0.566 |
| 466 | At1g17345  | auxin-responsive protein-related                                   | >0.05 | 0.047 | 0.786 | 0.770 | 0.403 | 0.640 |
| 467 | At5g56550  | similar to unknown protein [Arabidopsis thaliana] (TAIR            | >0.05 | 0.015 | 0.678 | 0.778 | 0.290 | 0.612 |
| 468 | At1g35140  | PHI-1 (PHOSPHATE-INDUCED 1)                                        | >0.05 | 0.027 | 0.689 | 0.746 | 0.281 | 0.639 |
| 469 | At5g59520  | ZIP2 (ZINC TRANSPORTER 2 PRECURSOR); transferase, i                | >0.05 | 0.017 | 0.802 | 0.916 | 0.455 | 0.700 |
| 470 | At3g57020  | strictosidine synthase family protein                              | 0.042 | 0.003 | 0.688 | 0.785 | 0.253 | 0.498 |
| 471 | At3g25820  | ATTPS-CIN (TERPENE SYNTHASE-LIKE SEQUENCE-1,8-CI                   | 0.042 | 0.007 | 0.592 | 1.034 | 0.217 | 0.511 |
| 472 | At3g25830  | ATTPS-CIN (TERPENE SYNTHASE-LIKE SEQUENCE-1,8-CI                   | 0.042 | 0.005 | 0.604 | 0.936 | 0.231 | 0.509 |
| 473 | ath-MIR163 | miRNA gene Arabidopsis thaliana miR163 stem-loop                   | 0.036 | 0.013 | 0.652 | 1.118 | 0.407 | 0.763 |
| 474 | At3g12955  | auxin-responsive protein-related                                   | 0.034 | 0.009 | 0.496 | 1.314 | 0.233 | 0.471 |
| 475 | At1g64590  | short-chain dehydrogenase/reductase (SDR) family pro               | >0.05 | 0.028 | 0.657 | 0.964 | 0.388 | 0.829 |
| 476 | At5g02270  | ATNAP9 (Non-intrinsic ABC protein 9)                               | 0.023 | 0.003 | 0.753 | 0.920 | 0.491 | 0.856 |
| 477 | At5g14470  | GHMP kinase-related                                                | >0.05 | 0.038 | 1.112 | 0.829 | 0.395 | 0.570 |
| 478 | At1g18330  | EPR1 (EARLY-PHYTOCHROME-RESPONSIVE1); DNA binc                     | >0.05 | 0.022 | 1.021 | 0.926 | 0.413 | 0.591 |
| 479 | At1g78450  | SOUL heme-binding family protein                                   | 0.037 | 0.006 | 1.074 | 0.791 | 0.320 | 0.366 |
| 480 | At3g23880  | F-box family protein                                               | 0.018 | 0.010 | 1.339 | 0.819 | 0.381 | 0.596 |
| 481 | At5g03240  | UBQ3 (POLYUBIQUITIN 3); protein binding                            | 0.032 | 0.019 | 1.242 | 0.840 | 0.442 | 0.626 |
| 482 | At5g36910  | THI2.2 (THIONIN 2.2); toxin receptor binding                       | 0.035 | 0.022 | 1.105 | 1.064 | 0.348 | 0.464 |

|     |           |                                                           |       |       |       |       |       |       |
|-----|-----------|-----------------------------------------------------------|-------|-------|-------|-------|-------|-------|
| 483 | At5g66130 | ATRAD17 (RADIATION SENSITIVE)                             | 0.037 | 0.046 | 1.202 | 1.019 | 0.460 | 0.658 |
| 484 | At5g52640 | HSP81-1 (HEAT SHOCK PROTEIN 81-1); ATP binding / u        | 0.042 | >0.05 | 1.115 | 1.240 | 0.395 | 0.598 |
| 485 | At2g30540 | glutaredoxin family protein                               | 0.024 | 0.039 | 1.391 | 1.093 | 0.400 | 0.448 |
| 486 | At1g03620 | phagocytosis and cell motility protein ELMO1-related      | >0.05 | 0.022 | 0.818 | 0.941 | 0.450 | 0.520 |
| 487 | At1g13670 | unknown protein                                           | >0.05 | 0.007 | 0.761 | 0.989 | 0.407 | 0.449 |
| 488 | At1g60740 | peroxiredoxin type 2, putative                            | 0.031 | 0.003 | 0.817 | 0.928 | 0.461 | 0.449 |
| 489 | At1g62975 | basic helix-loop-helix (bHLH) family protein (bHLH125)    | >0.05 | 0.033 | 0.835 | 0.907 | 0.508 | 0.484 |
| 490 | At1g77530 | O-methyltransferase family 2 protein                      | >0.05 | 0.034 | 0.951 | 1.001 | 0.588 | 0.468 |
| 491 | At4g29740 | CKX4 (CYTOKININ OXIDASE 4); cytokinin dehydrogenas        | >0.05 | 0.024 | 0.954 | 1.063 | 0.498 | 0.374 |
| 492 | At1g78290 | serine/threonine protein kinase, putative similar to ser  | >0.05 | 0.038 | 0.923 | 1.105 | 0.477 | 0.468 |
| 493 | At2g16005 | MD-2-related lipid recognition domain-containing prot     | 0.031 | 0.012 | 0.832 | 1.220 | 0.387 | 0.497 |
| 494 | At5g17970 | disease resistance protein (TIR-NBS-LRR class), putative  | 0.028 | 0.001 | 0.642 | 0.946 | 0.490 | 0.434 |
| 495 | At4g11320 | cysteine proteinase, putative                             | >0.05 | 0.003 | 0.632 | 0.884 | 0.490 | 0.434 |
| 496 | At5g19530 | ACL5 (ACAULIS 5)                                          | >0.05 | 0.003 | 0.703 | 0.906 | 0.642 | 0.497 |
| 497 | At2g38600 | acid phosphatase class B family protein                   | 0.040 | 0.002 | 0.695 | 0.810 | 0.455 | 0.383 |
| 498 | At3g23510 | cyclopropane fatty acid synthase, putative / CPA-FA sy    | 0.023 | 0.001 | 0.684 | 0.689 | 0.331 | 0.280 |
| 499 | At2g47180 | ATGOLS1 (ARABIDOPSIS THALIANA GALACTINOL SYNT             | >0.05 | 0.010 | 0.709 | 0.807 | 0.574 | 0.426 |
| 500 | At3g59480 | pfkB-type carbohydrate kinase family protein              | >0.05 | 0.012 | 0.717 | 0.774 | 0.603 | 0.408 |
| 501 | At1g19050 | ARR7 (RESPONSE REGULATOR 7); transcription regulat        | >0.05 | 0.002 | 0.816 | 0.845 | 0.620 | 0.489 |
| 502 | At5g63600 | flavonol synthase, putative                               | >0.05 | 0.010 | 0.664 | 1.042 | 0.606 | 0.493 |
| 503 | At1g11450 | nodulin MtN21 family protein                              | 0.048 | 0.004 | 0.617 | 1.047 | 0.598 | 0.435 |
| 504 | At4g31730 | GDU1 (GLUTAMINE DUMPER 1)                                 | >0.05 | 0.038 | 0.751 | 1.066 | 0.585 | 0.499 |
| 505 | At5g26280 | mepirin and TRAF homology domain-containing protei        | >0.05 | 0.003 | 0.425 | 0.952 | 0.443 | 0.417 |
| 506 | At2g28970 | leucine-rich repeat protein kinase, putative              | >0.05 | 0.014 | 0.433 | 0.964 | 0.417 | 0.464 |
| 507 | At5g51790 | basix helix-loop-helix (bHLH) family protein              | >0.05 | 0.020 | 0.479 | 0.886 | 0.449 | 0.440 |
| 508 | At5g62920 | ARR6 (RESPONSE REGULATOR 6); transcription regulat        | >0.05 | 0.001 | 0.535 | 0.829 | 0.520 | 0.419 |
| 509 | At1g12010 | 1-aminocyclopropane-1-carboxylate oxidase, putative ,     | >0.05 | 0.003 | 0.346 | 0.682 | 0.411 | 0.305 |
| 510 | At1g21100 | O-methyltransferase, putative                             | >0.05 | 0.003 | 0.522 | 0.803 | 0.550 | 0.484 |
| 511 | At1g31320 | LBD4 (LOB DOMAIN-CONTAINING PROTEIN 4)                    | >0.05 | 0.006 | 0.661 | 0.890 | 0.807 | 0.492 |
| 512 | At5g62630 | HIPL2 (HIPL2 PROTEIN PRECURSOR); catalytic                | 0.035 | 0.004 | 0.807 | 0.966 | 0.735 | 0.495 |
| 513 | At2g40330 | Bet v I allergen family protein                           | >0.05 | 0.009 | 0.779 | 0.945 | 0.763 | 0.459 |
| 514 | At1g58370 | RXF12; hydrolase, hydrolyzing O-glycosyl compounds        | >0.05 | 0.020 | 0.886 | 0.719 | 0.595 | 0.464 |
| 515 | At3g14770 | nodulin MtN3 family protein                               | >0.05 | 0.019 | 0.886 | 0.622 | 0.471 | 0.504 |
| 516 | At3g15250 | similar to unknown protein [Arabidopsis thaliana] (TAI    | >0.05 | 0.027 | 0.864 | 0.675 | 0.520 | 0.493 |
| 517 | At2g01800 | COP1-interacting protein-related                          | >0.05 | 0.036 | 0.843 | 0.609 | 0.662 | 0.454 |
| 518 | At2g41990 | similar to unknown protein [Arabidopsis thaliana] (TAI    | >0.05 | 0.040 | 0.903 | 0.656 | 0.801 | 0.477 |
| 519 | At5g14130 | peroxidase, putative                                      | 0.033 | 0.006 | 0.578 | 0.925 | 0.964 | 0.472 |
| 520 | At1g70880 | Bet v I allergen family protein                           | >0.05 | 0.022 | 0.556 | 1.080 | 0.700 | 0.429 |
| 521 | At1g72360 | ethylene-responsive element-binding protein, putative     | >0.05 | 0.036 | 0.547 | 1.185 | 0.807 | 0.417 |
| 522 | At1g15380 | lactoylglutathione lyase family protein / glyoxalase I fa | >0.05 | 0.023 | 0.462 | 1.025 | 0.679 | 0.474 |
| 523 | At5g33360 | transposable element gene                                 | >0.05 | 0.045 | 0.493 | 0.960 | 0.894 | 0.633 |
| 524 | At5g43520 | DC1 domain-containing protein                             | >0.05 | 0.010 | 0.468 | 0.680 | 0.783 | 0.373 |
| 525 | At4g08160 | glycosyl hydrolase family 10 protein / carbohydrate-bir   | >0.05 | 0.012 | 0.493 | 0.763 | 0.886 | 0.500 |
| 526 | At1g07550 | leucine-rich repeat protein kinase, putative              | >0.05 | 0.010 | 0.553 | 0.597 | 0.800 | 0.443 |
| 527 | At2g19060 | GDSL-motif lipase/hydrolase family protein                | >0.05 | 0.007 | 0.528 | 0.554 | 0.843 | 0.418 |
| 528 | At5g44610 | MAP18 (MICROTUBULE-ASSOCIATED PROTEIN 18); mic            | >0.05 | 0.002 | 0.405 | 0.580 | 0.724 | 0.497 |
| 529 | At1g60140 | ATTPS10 (TREHALOSE PHOSPHATE SYNTHASE); transfe           | >0.05 | 0.002 | 0.415 | 0.595 | 0.761 | 0.524 |
| 530 | At2g39530 | integral membrane protein, putative                       | >0.05 | 0.002 | 0.399 | 0.637 | 0.842 | 0.543 |
| 531 | At3g13435 | unknown protein                                           | >0.05 | 0.005 | 0.354 | 0.607 | 0.869 | 0.430 |

|     |           |                                                          |       |       |       |       |       |       |
|-----|-----------|----------------------------------------------------------|-------|-------|-------|-------|-------|-------|
| 532 | At4g18340 | glycosyl hydrolase family 17 protein                     | >0.05 | 0.002 | 0.354 | 0.648 | 0.781 | 0.450 |
| 533 | At2g44390 | DC1 domain-containing protein                            | >0.05 | 0.008 | 0.454 | 0.629 | 0.732 | 0.669 |
| 534 | At4g11290 | peroxidase, putative                                     | >0.05 | 0.004 | 0.441 | 0.592 | 0.692 | 0.684 |
| 535 | At3g20140 | CYP705A23 (cytochrome P450, family 705, subfamily A      | >0.05 | 0.029 | 0.391 | 0.646 | 0.708 | 0.653 |
| 536 | At4g15300 | CYP702A2 (cytochrome P450, family 702, subfamily A,      | >0.05 | 0.023 | 0.479 | 0.706 | 0.821 | 0.758 |
| 537 | At3g14260 | similar to unknown protein [Arabidopsis thaliana] (TAIR  | >0.05 | 0.038 | 0.471 | 0.612 | 0.866 | 0.640 |
| 538 | At4g07820 | pathogenesis-related protein, putative                   | >0.05 | 0.006 | 0.386 | 0.449 | 0.852 | 0.556 |
| 539 | At4g29180 | leucine-rich repeat protein kinase, putative             | >0.05 | 0.032 | 0.496 | 0.602 | 0.822 | 0.788 |
| 540 | At2g28990 | leucine-rich repeat protein kinase, putative             | >0.05 | 0.041 | 0.478 | 0.814 | 0.846 | 0.716 |
| 541 | At3g60020 | ASK5 (ARABIDOPSIS SKP1-LIKE 5); ubiquitin-protein liga   | >0.05 | 0.024 | 0.418 | 0.733 | 0.766 | 0.598 |
| 542 | At4g13130 | DC1 domain-containing protein                            | >0.05 | 0.024 | 0.475 | 0.857 | 0.787 | 0.800 |
| 543 | At5g49770 | leucine-rich repeat transmembrane protein kinase, put    | 0.026 | 0.024 | 0.408 | 0.797 | 1.431 | 0.606 |
| 544 | At1g77145 | similar to unknown protein [Arabidopsis thaliana] (TAIR  | >0.05 | 0.040 | 0.475 | 0.841 | 1.113 | 0.760 |
| 545 | At1g49860 | ATGSTF14 (Arabidopsis thaliana Glutathione S-transfer    | 0.019 | 0.003 | 0.232 | 0.472 | 1.433 | 0.421 |
| 546 | At4g15390 | transferase family protein                               | >0.05 | 0.005 | 0.282 | 0.554 | 0.999 | 0.512 |
| 547 | At2g23620 | esterase, putative                                       | 0.050 | 0.006 | 0.399 | 0.413 | 1.211 | 0.432 |
| 548 | At1g14160 | integral membrane family protein                         | >0.05 | 0.029 | 0.489 | 1.130 | 0.628 | 0.834 |
| 549 | At1g74690 | IQD31 (IQ-domain 31); calmodulin binding                 | 0.021 | >0.05 | 1.342 | 0.487 | 0.872 | 1.002 |
| 550 | At5g15830 | ATBZIP3 (ARABIDOPSIS THALIANA BASIC LEUCINE-ZIPPI        | 0.021 | >0.05 | 0.623 | 1.716 | 0.883 | 0.456 |
| 551 | At4g23410 | TET5 (TETRASPANIN5)                                      | 0.025 | 0.032 | 0.584 | 1.383 | 0.909 | 0.493 |
| 552 | At2g01520 | MLP328 (MLP-LIKE PROTEIN 328)                            | 0.020 | 0.012 | 0.584 | 1.490 | 0.633 | 0.439 |
| 553 | At4g23420 | short-chain dehydrogenase/reductase (SDR) family pro     | >0.05 | 0.038 | 0.704 | 1.210 | 0.746 | 0.498 |
| 554 | At5g56060 | ATP binding / nucleotide binding / phenylalanine-tRNA    | 0.018 | >0.05 | 0.876 | 1.444 | 0.967 | 0.476 |
| 555 | At3g49760 | ATBZIP5 (ARABIDOPSIS THALIANA BASIC LEUCINE-ZIPPI        | 0.024 | >0.05 | 0.681 | 2.457 | 0.619 | 0.509 |
| 556 | At1g23120 | major latex protein-related / MLP-related                | 0.033 | >0.05 | 0.545 | 2.164 | 0.742 | 0.607 |
| 557 | At2g29330 | TRI (TROPINONE REDUCTASE); oxidoreductase                | 0.026 | >0.05 | 0.452 | 2.039 | 1.067 | 1.181 |
| 558 | At3g02885 | GASAs (GAST1 PROTEIN HOMOLOG 5)                          | 0.008 | 0.010 | 0.466 | 1.287 | 1.054 | 0.701 |
| 559 | At1g02920 | ATGSTF7 (GLUTATHIONE S-TRANSFERASE 11); glutathic        | >0.05 | 0.007 | 1.473 | 3.155 | 3.041 | 1.931 |
| 560 | At2g41350 | similar to unknown protein [Arabidopsis thaliana] (TAIR  | >0.05 | 0.038 | 1.275 | 1.899 | 2.012 | 1.471 |
| 561 | At2g47950 | unknown protein                                          | >0.05 | 0.002 | 1.463 | 2.905 | 3.165 | 1.660 |
| 562 | At1g26380 | FAD-binding domain-containing protein                    | >0.05 | 0.002 | 1.559 | 2.455 | 2.298 | 1.734 |
| 563 | At5g27760 | hypoxia-responsive family protein                        | >0.05 | 0.001 | 1.391 | 2.183 | 2.069 | 1.528 |
| 564 | At4g28460 | unknown protein                                          | >0.05 | 0.004 | 1.692 | 3.330 | 2.795 | 1.927 |
| 565 | At2g37870 | protease inhibitor/seed storage/lipid transfer protein ( | >0.05 | 0.001 | 1.742 | 3.044 | 2.743 | 1.719 |
| 566 | At1g43910 | AAA-type ATPase family protein                           | >0.05 | 0.003 | 1.701 | 2.334 | 2.325 | 1.630 |
| 567 | At1g26420 | FAD-binding domain-containing protein                    | >0.05 | 0.003 | 1.404 | 2.699 | 2.303 | 1.593 |
| 568 | At3g44300 | NIT2 (NITRILASE 2)                                       | >0.05 | 0.003 | 1.403 | 2.908 | 2.522 | 1.718 |
| 569 | At1g52700 | phospholipase/carboxylesterase family protein            | 0.031 | 0.001 | 1.305 | 2.618 | 1.956 | 1.601 |
| 570 | At3g11580 | DNA-binding protein, putative                            | >0.05 | 0.000 | 1.413 | 3.201 | 2.412 | 1.841 |
| 571 | At5g39130 | germin-like protein, putative                            | >0.05 | 0.003 | 1.454 | 2.790 | 2.103 | 1.604 |
| 572 | At2g32210 | similar to unknown protein [Arabidopsis thaliana] (TAIR  | 0.021 | 0.000 | 1.358 | 2.222 | 1.821 | 1.404 |
| 573 | At4g19970 | similar to unknown protein [Arabidopsis thaliana] (TAIR  | >0.05 | 0.021 | 1.407 | 2.337 | 1.967 | 1.412 |
| 574 | At4g26270 | phosphofructokinase family protein                       | >0.05 | 0.001 | 1.310 | 2.032 | 1.782 | 1.355 |
| 575 | At5g06760 | late embryogenesis abundant group 1 domain-contain       | >0.05 | 0.004 | 1.714 | 2.919 | 2.068 | 2.064 |
| 576 | At5g39110 | germin-like protein, putative                            | >0.05 | 0.002 | 1.804 | 4.205 | 2.540 | 2.396 |
| 577 | At2g23270 | similar to unknown protein [Arabidopsis thaliana] (TAIR  | >0.05 | 0.001 | 1.825 | 4.735 | 2.962 | 2.604 |
| 578 | At2g46680 | ATHB-7 (ARABIDOPSIS THALIANA HOMEBOX 7); trans           | >0.05 | 0.001 | 1.527 | 2.496 | 1.952 | 1.802 |
| 579 | At2g20145 | Toll-Interleukin-Resistance (TIR) domain-containing pro  | 0.009 | 0.000 | 1.396 | 2.760 | 1.830 | 1.865 |
| 580 | At5g39160 | germin-like protein (GLP2a) (GLP5a)                      | >0.05 | 0.001 | 1.595 | 3.242 | 2.036 | 1.817 |

|     |           |                                                            |       |       |       |       |       |       |
|-----|-----------|------------------------------------------------------------|-------|-------|-------|-------|-------|-------|
| 581 | At5g39190 | GLP2A (GERMIN-LIKE PROTEIN 2A); manganese ion bin          | >0.05 | 0.002 | 1.748 | 3.635 | 2.373 | 1.919 |
| 582 | At5g52750 | heavy-metal-associated domain-containing protein           | >0.05 | 0.001 | 1.810 | 2.488 | 2.287 | 1.983 |
| 583 | At1g33030 | O-methyltransferase family 2 protein                       | >0.05 | 0.003 | 1.703 | 2.728 | 2.590 | 2.083 |
| 584 | At5g57220 | CYP81F2 (cytochrome P450, family 81, subfamily F, pol      | >0.05 | 0.012 | 1.593 | 2.290 | 2.191 | 1.764 |
| 585 | At2g29460 | ATGSTU4 (GLUTATHIONE S-TRANSFERASE 22); glutathi           | >0.05 | 0.001 | 1.844 | 3.111 | 2.610 | 2.531 |
| 586 | At2g32190 | similar to unknown protein [Arabidopsis thaliana] (TAIR    | >0.05 | 0.000 | 1.613 | 2.344 | 2.089 | 2.055 |
| 587 | At5g26920 | calmodulin binding                                         | >0.05 | 0.002 | 1.371 | 2.415 | 2.439 | 2.248 |
| 588 | At5g39180 | germin-like protein, putative                              | >0.05 | 0.002 | 1.617 | 6.602 | 5.317 | 4.065 |
| 589 | At2g43510 | ATTI1 (ARABIDOPSIS THALIANA TRYPSIN INHIBITOR PRI          | >0.05 | 0.002 | 1.843 | 7.454 | 5.229 | 4.959 |
| 590 | At5g44820 | similar to unknown protein [Arabidopsis thaliana] (TAIR    | >0.05 | 0.024 | 1.334 | 2.410 | 2.047 | 1.752 |
| 591 | At4g10500 | oxidoreductase, 2OG-Fe(II) oxygenase family protein        | >0.05 | 0.004 | 1.280 | 2.772 | 2.129 | 1.878 |
| 592 | At2g43570 | chitinase, putative                                        | >0.05 | 0.002 | 1.627 | 3.274 | 3.093 | 2.229 |
| 593 | At5g52390 | photoassimilate-responsive protein, putative               | >0.05 | 0.010 | 1.380 | 3.253 | 2.239 | 3.198 |
| 594 | At1g48000 | MYB112 (myb domain protein 112); DNA binding / tran        | >0.05 | 0.004 | 1.371 | 2.446 | 1.853 | 2.198 |
| 595 | At1g66700 | PXMT1; S-adenosylmethionine-dependent methyltrans          | >0.05 | 0.006 | 1.544 | 3.814 | 2.631 | 2.716 |
| 596 | At1g48325 | Expressed protein                                          | 0.025 | 0.001 | 1.237 | 2.984 | 2.114 | 2.289 |
| 597 | At5g06080 | LBD33 (LOB DOMAIN-CONTAINING PROTEIN 33)                   | >0.05 | 0.004 | 1.665 | 5.890 | 3.552 | 1.786 |
| 598 | At5g13320 | PBS3 (AVRPPHB SUSCEPTIBLE 3)                               | >0.05 | 0.019 | 1.384 | 2.462 | 1.953 | 1.265 |
| 599 | At1g74045 | TET17 (TETRASPANIN16)                                      | >0.05 | 0.002 | 1.376 | 2.666 | 2.133 | 1.328 |
| 600 | At1g57630 | disease resistance protein (TIR class), putative           | >0.05 | 0.006 | 1.311 | 2.086 | 1.593 | 1.287 |
| 601 | At1g73010 | phosphoric monoester hydrolase                             | >0.05 | 0.004 | 1.520 | 3.123 | 2.032 | 1.535 |
| 602 | At1g17710 | phosphoric monoester hydrolase                             | >0.05 | 0.002 | 1.334 | 2.185 | 1.654 | 1.274 |
| 603 | At5g38910 | germin-like protein, putative                              | >0.05 | 0.007 | 2.942 | 9.495 | 6.693 | 1.975 |
| 604 | At5g40370 | glutaredoxin, putative                                     | >0.05 | 0.001 | 1.448 | 2.190 | 1.617 | 1.334 |
| 605 | At1g47960 | C/VIF1 (CELL WALL / VACUOLAR INHIBITOR OF FRUCTO           | 0.020 | 0.000 | 1.823 | 3.233 | 2.067 | 1.549 |
| 606 | At1g65690 | harpin-induced protein-related / HIN1-related / harpin     | >0.05 | 0.002 | 1.396 | 2.119 | 1.604 | 1.334 |
| 607 | At1g60730 | aldo/keto reductase family protein                         | >0.05 | 0.000 | 1.843 | 3.415 | 2.392 | 1.727 |
| 608 | At3g08860 | alanine--glyoxylate aminotransferase, putative / beta-a    | >0.05 | 0.002 | 2.090 | 4.086 | 2.475 | 2.013 |
| 609 | At4g01380 | plastocyanin-like domain-containing protein                | 0.039 | 0.000 | 1.658 | 2.691 | 1.807 | 1.554 |
| 610 | At2g31200 | ADF6 (ACTIN DEPOLYMERIZING FACTOR 6); actin bindin         | >0.05 | 0.002 | 1.429 | 2.016 | 1.439 | 1.277 |
| 611 | At1g17490 | similar to unknown protein [Arabidopsis thaliana] (TAIR    | 0.021 | 0.001 | 1.317 | 2.043 | 1.432 | 1.286 |
| 612 | At1g73040 | jacalin lectin family protein                              | >0.05 | 0.002 | 1.879 | 2.795 | 2.268 | 1.813 |
| 613 | At2g18660 | EXLB3 (EXPANSIN-LIKE B3 PRECURSOR)                         | >0.05 | 0.002 | 1.920 | 2.658 | 2.225 | 1.452 |
| 614 | At4g17670 | senescence-associated protein-related                      | 0.025 | 0.000 | 1.863 | 2.739 | 2.212 | 1.498 |
| 615 | At1g12200 | flavin-containing monooxygenase family protein / FMC       | >0.05 | 0.001 | 1.664 | 2.296 | 2.048 | 1.407 |
| 616 | At3g16360 | AHP4 (HPT PHOSPHOTRANSMITTER 4); histidine phosph          | >0.05 | 0.002 | 2.438 | 3.521 | 2.587 | 1.687 |
| 617 | At1g26410 | FAD-binding domain-containing protein                      | 0.029 | 0.002 | 1.001 | 3.342 | 1.904 | 1.929 |
| 618 | At1g60470 | ATGOLS4 (ARABIDOPSIS THALIANA GALACTINOL SYNTH             | 0.046 | 0.003 | 1.052 | 5.105 | 2.769 | 2.465 |
| 619 | At3g60180 | uridylyl transferase, putative / uridine monophosphate kir | >0.05 | 0.009 | 1.061 | 2.248 | 1.646 | 1.504 |
| 620 | At3g53160 | UGT73C7 (UDP-GLUCOSYL TRANSFERASE 73C7); UDP-g             | 0.035 | 0.002 | 1.162 | 3.023 | 1.987 | 1.911 |
| 621 | At4g37390 | YDK1 (YADOKARI 1); indole-3-acetic acid amido synthe       | >0.05 | 0.009 | 1.040 | 2.821 | 1.965 | 2.002 |
| 622 | At5g66700 | HB53 (homeobox-8); DNA binding / transcription facto       | >0.05 | 0.011 | 1.089 | 2.389 | 1.384 | 1.654 |
| 623 | At2g42430 | LBD16 (ASYMMETRIC LEAVES2-LIKE18)                          | >0.05 | 0.007 | 1.096 | 2.305 | 1.467 | 1.597 |
| 624 | At1g60970 | clathrin adaptor complex small chain family protein        | 0.042 | 0.004 | 1.076 | 2.717 | 1.532 | 1.581 |
| 625 | At2g39800 | P5CS1 (DELTA1-PYRROLINE-5-CARBOXYLATE SYNTHASE             | >0.05 | 0.014 | 1.183 | 2.132 | 1.426 | 1.524 |
| 626 | At3g21720 | isocitrate lyase, putative                                 | 0.032 | 0.002 | 1.217 | 3.283 | 1.443 | 2.079 |
| 627 | At5g57123 | similar to unknown protein [Arabidopsis thaliana] (TAIR    | >0.05 | 0.033 | 1.162 | 2.142 | 1.407 | 1.888 |
| 628 | At5g13210 | similar to unknown protein [Arabidopsis thaliana] (TAIR    | >0.05 | 0.002 | 1.539 | 2.946 | 1.515 | 1.845 |
| 629 | At4g02280 | SUS3; UDP-glycosyltransferase/ sucrose synthase/ tran      | >0.05 | 0.001 | 1.671 | 3.796 | 1.777 | 2.074 |

|     |           |                                                          |       |       |       |       |       |       |
|-----|-----------|----------------------------------------------------------|-------|-------|-------|-------|-------|-------|
| 630 | At3g48920 | AtMYB45 (myb domain protein 45); DNA binding / tran      | >0.05 | 0.003 | 1.288 | 2.262 | 1.372 | 1.548 |
| 631 | At5g52760 | heavy-metal-associated domain-containing protein         | >0.05 | 0.004 | 1.817 | 3.483 | 1.769 | 1.983 |
| 632 | At4g04620 | ATG8B (AUTOPHAGY 8B); microtubule binding                | >0.05 | 0.002 | 1.418 | 2.823 | 1.388 | 1.464 |
| 633 | At4g25010 | nodulin MtN3 family protein                              | >0.05 | 0.038 | 1.617 | 2.694 | 1.362 | 1.530 |
| 634 | At4g31330 | similar to unknown protein [Arabidopsis thaliana] (TAI   | 0.040 | 0.002 | 1.433 | 2.552 | 1.273 | 1.545 |
| 635 | At2g41730 | similar to unknown protein [Arabidopsis thaliana] (TAI   | 0.035 | 0.001 | 2.279 | 4.180 | 1.557 | 2.197 |
| 636 | At4g12735 | similar to unknown protein [Arabidopsis thaliana] (TAI   | >0.05 | 0.004 | 3.208 | 7.388 | 2.092 | 3.713 |
| 637 | At5g17220 | ATGSTF12 (GLUTATHIONE S-TRANSFERASE 26); glutath         | >0.05 | 0.005 | 2.258 | 2.365 | 1.734 | 1.724 |
| 638 | At2g47520 | AP2 domain-containing transcription factor, putative     | >0.05 | 0.004 | 2.593 | 2.769 | 1.921 | 1.717 |
| 639 | At3g50770 | calmodulin-related protein, putative                     | >0.05 | 0.002 | 2.840 | 2.726 | 1.949 | 2.031 |
| 640 | At4g22880 | LDOX (TANNIN DEFICIENT SEED 4)                           | >0.05 | 0.009 | 4.310 | 3.895 | 2.599 | 2.728 |
| 641 | At4g37370 | CYP81D8 (cytochrome P450, family 81, subfamily D, pc     | >0.05 | 0.002 | 2.971 | 2.716 | 1.909 | 2.243 |
| 642 | At5g40010 | AATP1 (AAA-ATPASE 1); ATP binding / ATPase               | >0.05 | 0.030 | 1.663 | 2.077 | 1.569 | 1.562 |
| 643 | At4g35190 | similar to unknown protein [Arabidopsis thaliana] (TAI   | >0.05 | 0.005 | 2.277 | 3.013 | 2.088 | 1.949 |
| 644 | At5g56630 | phosphofruktokinase family protein                       | >0.05 | 0.002 | 1.663 | 2.053 | 1.630 | 1.625 |
| 645 | At1g52855 | similar to unknown protein [Arabidopsis thaliana] (TAI   | >0.05 | 0.001 | 2.276 | 2.589 | 2.169 | 1.918 |
| 646 | At1g70810 | C2 domain-containing protein                             | >0.05 | 0.000 | 1.878 | 2.009 | 1.740 | 1.520 |
| 647 | At4g14400 | ACD6 (ACCELERATED CELL DEATH 6); protein binding         | >0.05 | 0.001 | 3.599 | 3.079 | 3.196 | 1.680 |
| 648 | At5g05300 | similar to unknown protein [Arabidopsis thaliana] (TAI   | 0.024 | 0.001 | 1.540 | 2.237 | 4.185 | 1.499 |
| 649 | At1g73800 | calmodulin-binding protein similar to calmodulin-bind    | >0.05 | 0.017 | 1.320 | 1.601 | 2.386 | 1.239 |
| 650 | At3g25882 | NIMIN-2 (NIM1-INTERACTING 2)                             | >0.05 | 0.004 | 1.497 | 2.014 | 3.325 | 1.353 |
| 651 | At4g21366 | S-locus protein kinase-related                           | >0.05 | 0.014 | 1.315 | 1.498 | 2.098 | 1.314 |
| 652 | At2g22190 | trehalose-phosphatase                                    | >0.05 | 0.012 | 1.349 | 1.395 | 2.311 | 1.255 |
| 653 | At3g62730 | similar to unknown protein [Arabidopsis thaliana] (TAI   | >0.05 | 0.047 | 1.440 | 1.826 | 4.077 | 1.506 |
| 654 | At1g26390 | FAD-binding domain-containing protein                    | >0.05 | 0.028 | 1.231 | 2.358 | 3.350 | 1.383 |
| 655 | At1g55780 | heavy-metal-associated domain-containing protein         | >0.05 | 0.004 | 1.154 | 1.877 | 2.381 | 1.245 |
| 656 | At5g66640 | LIM domain-containing protein-related                    | >0.05 | 0.028 | 1.108 | 1.578 | 2.160 | 1.162 |
| 657 | At4g21390 | B120; protein kinase/ sugar binding                      | >0.05 | 0.034 | 1.175 | 1.468 | 2.079 | 1.163 |
| 658 | At5g16200 | 50S ribosomal protein-related                            | 0.035 | 0.002 | 1.131 | 1.620 | 2.154 | 1.288 |
| 659 | At5g49850 | jacalin lectin family protein                            | >0.05 | 0.035 | 1.180 | 1.846 | 2.519 | 1.492 |
| 660 | At3g52780 | ATPAP20/PAP20; acid phosphatase/ protein serine/thr      | >0.05 | 0.000 | 1.415 | 2.261 | 4.411 | 1.695 |
| 661 | At5g40000 | AAA-type ATPase family protein                           | >0.05 | 0.010 | 1.134 | 3.824 | 6.576 | 2.013 |
| 662 | At2g18360 | hydrolase, alpha/beta fold family protein                | >0.05 | 0.014 | 1.045 | 1.602 | 2.015 | 1.270 |
| 663 | At4g25900 | aldose 1-epimerase family protein                        | >0.05 | 0.011 | 1.110 | 1.947 | 2.377 | 1.352 |
| 664 | At5g43650 | basic helix-loop-helix (bHLH) family protein             | >0.05 | 0.040 | 1.127 | 2.501 | 4.816 | 1.760 |
| 665 | At5g53820 | similar to unknown protein [Arabidopsis thaliana] (TAI   | 0.035 | 0.000 | 2.998 | 4.978 | 8.179 | 2.609 |
| 666 | At3g48840 | RNA recognition motif (RRM)-containing protein           | >0.05 | 0.001 | 1.861 | 2.456 | 3.108 | 1.567 |
| 667 | At2g30750 | CYP71A12 (CYTOCHROME P450, FAMILY 71, SUBFAMIL           | >0.05 | 0.005 | 2.813 | 6.868 | 8.746 | 3.161 |
| 668 | At1g77120 | ADH1 (ALCOHOL DEHYDROGENASE 1)                           | >0.05 | 0.004 | 1.395 | 2.192 | 2.991 | 1.479 |
| 669 | At3g11840 | U-box domain-containing protein                          | >0.05 | 0.004 | 1.345 | 1.700 | 2.096 | 1.281 |
| 670 | At3g61990 | O-methyltransferase family 3 protein                     | >0.05 | 0.041 | 1.268 | 1.715 | 2.061 | 1.434 |
| 671 | At5g09290 | 3'(2'),5'-bisphosphate nucleotidase, putative / inositol | >0.05 | 0.029 | 1.028 | 1.975 | 2.068 | 1.204 |
| 672 | At1g51030 | similar to unknown protein [Arabidopsis thaliana] (TAI   | >0.05 | 0.018 | 1.150 | 3.112 | 3.355 | 1.200 |
| 673 | At1g13195 | zinc finger (C3HC4-type RING finger) family protein      | 0.045 | 0.012 | 1.059 | 2.862 | 2.998 | 1.159 |
| 674 | At1g64405 | unknown protein                                          | 0.039 | 0.007 | 1.008 | 1.862 | 2.275 | 1.117 |
| 675 | At2g19990 | PR-1-LIKE (PATHOGENESIS-RELATED PROTEIN-1-LIKE)          | >0.05 | 0.012 | 1.096 | 2.285 | 2.874 | 1.118 |
| 676 | At4g30140 | GDSL-motif lipase/hydrolase family protein               | 0.047 | 0.008 | 1.068 | 1.939 | 2.732 | 1.135 |
| 677 | At5g19650 | ATOPF8/OPF8 (Arabidopsis thaliana ovate family prote     | >0.05 | 0.019 | 1.229 | 2.292 | 2.729 | 1.090 |
| 678 | At2g14610 | PR1 (PATHOGENESIS-RELATED GENE 1)                        | >0.05 | 0.006 | 1.813 | 5.347 | 7.516 | 1.539 |

|     |           |                                                          |       |       |       |       |       |       |
|-----|-----------|----------------------------------------------------------|-------|-------|-------|-------|-------|-------|
| 679 | At4g30650 | hydrophobic protein, putative / low temperature and s    | >0.05 | 0.006 | 1.229 | 1.727 | 2.029 | 1.133 |
| 680 | At2g15220 | secretory protein, putative                              | >0.05 | 0.004 | 1.412 | 2.914 | 3.064 | 1.286 |
| 681 | At4g19810 | glycosyl hydrolase family 18 protein                     | >0.05 | 0.002 | 1.566 | 3.770 | 3.931 | 1.452 |
| 682 | At3g18250 | contains domain PROKAR_LIPOPROTEIN (PS51257)             | >0.05 | 0.006 | 1.351 | 2.938 | 3.338 | 1.169 |
| 683 | At4g33550 | lipid binding                                            | 0.027 | 0.002 | 1.411 | 2.899 | 3.193 | 1.211 |
| 684 | At3g50550 | unknown protein                                          | >0.05 | 0.023 | 1.183 | 2.045 | 2.158 | 1.182 |
| 685 | At1g21312 | RNA recognition motif (RRM)-containing protein conta     | >0.05 | 0.025 | 1.233 | 2.595 | 2.483 | 1.190 |
| 686 | At4g34210 | ASK11 (ARABIDOPSIS SKP1-LIKE 11); ubiquitin-protein l    | >0.05 | 0.005 | 1.245 | 2.747 | 2.491 | 1.315 |
| 687 | At5g24770 | VSP2 (VEGETATIVE STORAGE PROTEIN 2); acid phosphat       | >0.05 | 0.033 | 1.313 | 2.006 | 2.278 | 1.297 |
| 688 | At5g36925 | similar to unknown protein [Arabidopsis thaliana] (TAIR  | >0.05 | 0.006 | 1.540 | 2.673 | 2.829 | 1.401 |
| 689 | At1g51000 | similar to unknown protein [Arabidopsis thaliana] (TAIR  | 0.036 | 0.009 | 1.254 | 5.485 | 4.281 | 0.882 |
| 690 | At2g18600 | RUB1-conjugating enzyme, putative                        | 0.013 | 0.001 | 1.207 | 2.221 | 2.052 | 1.025 |
| 691 | At2g30660 | 3-hydroxyisobutyryl-coenzyme A hydrolase, putative /     | >0.05 | 0.030 | 1.257 | 2.388 | 2.117 | 0.991 |
| 692 | At4g11890 | protein kinase family protein                            | >0.05 | 0.026 | 1.349 | 2.502 | 2.130 | 0.982 |
| 693 | At4g20370 | TSF (TWIN SISTER OF FT); phosphatidylethanolamine b      | 0.033 | 0.004 | 1.430 | 2.930 | 3.129 | 1.012 |
| 694 | At2g14560 | similar to unknown protein [Arabidopsis thaliana] (TAIR  | >0.05 | 0.000 | 2.767 | 4.601 | 5.859 | 1.501 |
| 695 | At3g13950 | similar to unknown protein [Arabidopsis thaliana] (TAIR  | 0.050 | 0.003 | 1.962 | 2.316 | 3.696 | 1.130 |
| 696 | At2g14600 | transposable element gene                                | >0.05 | 0.006 | 1.812 | 2.910 | 3.658 | 0.940 |
| 697 | At5g18170 | GDH1 (GLUTAMATE DEHYDROGENASE 1); oxidoreduct            | >0.05 | 0.038 | 1.130 | 1.355 | 2.120 | 0.983 |
| 698 | At1g66600 | WRKY63 (WRKY DNA-binding protein 63); transcription      | >0.05 | 0.019 | 1.263 | 2.789 | 4.401 | 0.838 |
| 699 | At1g26400 | FAD-binding domain-containing protein                    | >0.05 | 0.003 | 1.235 | 5.192 | 2.733 | 1.744 |
| 700 | At5g01225 | similar to unknown protein [Arabidopsis thaliana] (TAIR  | 0.029 | 0.002 | 1.191 | 2.729 | 1.858 | 1.392 |
| 701 | At5g44565 | unknown protein                                          | >0.05 | 0.003 | 1.202 | 2.708 | 2.068 | 1.577 |
| 702 | At1g70130 | lectin protein kinase, putative                          | >0.05 | 0.041 | 1.148 | 2.722 | 2.302 | 1.556 |
| 703 | At1g74590 | ATGSTU10 (Arabidopsis thaliana Glutathione S-transfer    | >0.05 | 0.003 | 1.227 | 4.862 | 3.757 | 1.888 |
| 704 | At2g42440 | LOB domain protein 17 / lateral organ boundaries dom     | >0.05 | 0.010 | 1.154 | 5.510 | 3.875 | 1.646 |
| 705 | At4g11655 | transmembrane protein, putative                          | 0.043 | 0.003 | 1.239 | 3.860 | 2.935 | 1.493 |
| 706 | At2g43580 | chitinase, putative                                      | 0.016 | 0.002 | 0.944 | 4.219 | 2.612 | 1.487 |
| 707 | At4g10720 | ankyrin repeat family protein                            | >0.05 | 0.032 | 0.989 | 2.428 | 1.730 | 1.300 |
| 708 | At5g62150 | peptidoglycan-binding LysM domain-containing protei      | 0.041 | 0.009 | 1.054 | 2.451 | 1.702 | 1.083 |
| 709 | At2g14330 | transposable element gene                                | >0.05 | 0.015 | 1.042 | 2.986 | 2.016 | 1.176 |
| 710 | At2g20142 | transmembrane receptor                                   | >0.05 | 0.010 | 1.178 | 2.053 | 1.646 | 1.091 |
| 711 | At4g34470 | ASK12 (ARABIDOPSIS SKP1-LIKE 12); protein binding / u    | >0.05 | 0.017 | 1.356 | 3.269 | 2.164 | 1.154 |
| 712 | At3g12510 | similar to At3g12510-like protein [Boechera stricta] (GI | >0.05 | 0.040 | 1.226 | 3.308 | 2.302 | 1.116 |
| 713 | At2g40750 | WRKY54 (WRKY DNA-binding protein 54); transcription      | >0.05 | 0.007 | 1.221 | 2.425 | 2.022 | 1.219 |
| 714 | At2g48150 | ATGPX4 (GLUTATHIONE PEROXIDASE 4); glutathione pe        | >0.05 | 0.015 | 1.192 | 2.296 | 1.815 | 1.175 |
| 715 | At3g57260 | BGL2 (PATHOGENESIS-RELATED PROTEIN 2); glucan 1,3        | >0.05 | 0.017 | 1.220 | 2.595 | 1.973 | 1.258 |
| 716 | At4g12500 | protease inhibitor/seed storage/lipid transfer protein ( | >0.05 | 0.022 | 1.204 | 2.258 | 1.701 | 1.216 |
| 717 | At3g55890 | yippee family protein                                    | >0.05 | 0.028 | 1.118 | 2.304 | 1.751 | 1.178 |
| 718 | At1g56600 | ATGOLS2 (ARABIDOPSIS THALIANA GALACTINOL SYNTH           | 0.019 | 0.002 | 1.084 | 3.478 | 1.737 | 1.456 |
| 719 | At2g29950 | ELF4-L1 (ELF4-LIKE 1)                                    | >0.05 | 0.028 | 1.112 | 2.089 | 1.371 | 1.285 |
| 720 | At4g37970 | mannitol dehydrogenase, putative                         | 0.043 | 0.013 | 1.043 | 2.986 | 1.507 | 1.180 |
| 721 | At5g01300 | phosphatidylethanolamine-binding family protein          | 0.029 | 0.005 | 1.011 | 2.711 | 1.600 | 1.250 |
| 722 | At5g22555 | unknown protein                                          | 0.048 | 0.018 | 0.834 | 3.713 | 3.076 | 1.204 |
| 723 | At4g23885 | similar to unknown protein [Arabidopsis thaliana] (TAIR  | >0.05 | 0.034 | 0.854 | 2.021 | 1.924 | 1.108 |
| 724 | At3g44510 | similar to esterase/lipase/thioesterase family protein [ | 0.041 | 0.007 | 0.930 | 2.132 | 2.189 | 1.213 |
| 725 | At2g19190 | FRK1 (FLG22-INDUCED RECEPTOR-LIKE KINASE 1); kina        | >0.05 | 0.018 | 1.004 | 2.283 | 2.170 | 1.021 |
| 726 | At4g11650 | ATOSM34 (OSMOTIN 34)                                     | 0.044 | 0.013 | 0.961 | 3.182 | 2.801 | 1.077 |
| 727 | At2g27535 | ribosomal protein L10A family protein                    | 0.029 | 0.018 | 0.850 | 2.467 | 1.724 | 1.071 |

|     |             |                                                          |       |       |       |       |       |       |
|-----|-------------|----------------------------------------------------------|-------|-------|-------|-------|-------|-------|
| 728 | At4g14060   | major latex protein-related / MLP-related                | 0.024 | 0.007 | 0.857 | 4.991 | 2.632 | 1.175 |
| 729 | At3g24310   | MYB305 (myb domain protein 305); DNA binding / trar      | 0.050 | 0.049 | 0.831 | 2.368 | 1.836 | 0.996 |
| 730 | At3g27070   | TOM20-1 (TRANSLOCASE OUTER MEMBRANE 20-1)                | 0.010 | 0.003 | 0.843 | 2.624 | 2.123 | 0.965 |
| 731 | At5g10760   | aspartyl protease family protein                         | >0.05 | 0.015 | 2.044 | 3.485 | 2.125 | 1.041 |
| 732 | At4g10860   | similar to unknown protein [Arabidopsis thaliana] (TAI   | >0.05 | 0.023 | 2.119 | 3.615 | 1.936 | 1.034 |
| 733 | At5g19470   | ATNUDT24 (Arabidopsis thaliana Nudix hydrolase hom       | >0.05 | 0.008 | 3.442 | 4.937 | 3.109 | 1.348 |
| 734 | At1g70800   | C2 domain-containing protein                             | 0.048 | 0.002 | 1.627 | 2.108 | 1.505 | 1.144 |
| 735 | At5g42040   | RPN12B (REGULATORY PARTICLE NON-ATPASE 12B); pe          | >0.05 | 0.010 | 1.559 | 2.290 | 2.106 | 1.005 |
| 736 | At3g63380   | calcium-transporting ATPase, plasma membrane-type,       | 0.040 | 0.002 | 1.697 | 3.159 | 2.421 | 1.053 |
| 737 | At2g23680   | stress-responsive protein, putative                      | >0.05 | 0.003 | 1.449 | 2.064 | 1.832 | 1.122 |
| 738 | ath-MIR395e | miRNA gene Arabidopsis thaliana miR395e stem-loop        | >0.05 | 0.039 | 1.538 | 2.322 | 1.817 | 0.976 |
| 739 | At5g46720   | similar to unknown protein [Arabidopsis thaliana] (TAI   | 0.046 | 0.005 | 1.181 | 2.065 | 1.392 | 1.119 |
| 740 | At1g35190   | oxidoreductase, 2OG-Fe(II) oxygenase family protein      | 0.032 | 0.003 | 1.158 | 2.183 | 1.464 | 1.153 |
| 741 | At4g37295   | unknown protein                                          | 0.019 | 0.001 | 1.309 | 2.434 | 1.593 | 1.108 |
| 742 | At5g02780   | ln2-1 protein, putative                                  | 0.043 | 0.004 | 1.303 | 3.074 | 1.514 | 1.274 |
| 743 | At5g50130   | short-chain dehydrogenase/reductase (SDR) family pro     | >0.05 | 0.003 | 1.734 | 3.345 | 1.724 | 1.321 |
| 744 | At4g12490   | protease inhibitor/seed storage/lipid transfer protein ( | >0.05 | 0.003 | 1.585 | 3.667 | 1.806 | 1.376 |
| 745 | At1g17020   | SRG1 (SENESCENCE-RELATED GENE 1); oxidoreductase,        | 0.031 | 0.001 | 1.680 | 3.263 | 1.935 | 1.313 |
| 746 | At1g53030   | cytochrome c oxidase copper chaperone family proteir     | >0.05 | 0.006 | 1.319 | 2.037 | 1.396 | 1.040 |
| 747 | At2g36270   | ABI5 (ABA INSENSITIVE 5); DNA binding / transcription    | >0.05 | 0.039 | 1.310 | 2.068 | 1.417 | 1.077 |
| 748 | At2g43720   | similar to unknown protein [Arabidopsis thaliana] (TAI   | 0.028 | 0.002 | 1.505 | 2.359 | 1.510 | 1.076 |
| 749 | At1g73220   | ATOCT1 (ARABIDOPSIS THALIANA ORGANIC CATION/C/           | >0.05 | 0.025 | 1.543 | 3.236 | 1.562 | 1.181 |
| 750 | At1g60920   | AGL55 (AGAMOUS-LIKE 55); DNA binding / transcrip         | 0.019 | 0.002 | 1.214 | 2.027 | 1.381 | 1.015 |
| 751 | At1g05730   | similar to unknown protein [Arabidopsis thaliana] (TAI   | >0.05 | 0.018 | 1.274 | 2.054 | 1.418 | 0.987 |
| 752 | At4g25380   | zinc finger (AN1-like) family protein                    | 0.016 | 0.003 | 1.275 | 3.098 | 1.826 | 0.913 |
| 753 | At2g05500   | unknown protein                                          | 0.035 | 0.010 | 1.134 | 2.225 | 1.343 | 1.011 |
| 754 | At5g26690   | heavy-metal-associated domain-containing protein         | 0.028 | 0.008 | 1.214 | 2.123 | 1.145 | 1.028 |
| 755 | At2g03250   | EXS family protein / ERD1/XPR1/SYG1 family protein       | >0.05 | 0.026 | 1.221 | 2.160 | 1.232 | 1.031 |
| 756 | At1g67640   | lysine and histidine specific transporter, putative      | >0.05 | 0.037 | 1.280 | 2.148 | 1.125 | 1.025 |
| 757 | At3g24780   | similar to unknown protein [Arabidopsis thaliana] (TAI   | >0.05 | 0.021 | 1.318 | 2.103 | 1.093 | 1.042 |
| 758 | At5g48410   | ATGLR1.3 (Arabidopsis thaliana glutamate receptor 1.3    | 0.028 | 0.004 | 1.331 | 2.440 | 1.178 | 1.172 |
| 759 | At3g30725   | ATGDU6 (ARABIDOPSIS THALIANA GLUTAMINE DUMPE             | 0.019 | 0.002 | 1.384 | 3.368 | 1.354 | 1.292 |
| 760 | At2g20380   | kelch repeat-containing F-box family protein             | >0.05 | 0.024 | 1.910 | 3.096 | 1.385 | 1.168 |
| 761 | At4g16310   | LDL3 (LSD1-LIKE3); amine oxidase                         | >0.05 | 0.049 | 1.728 | 3.198 | 1.380 | 1.121 |
| 762 | At5g24640   | similar to unknown protein [Arabidopsis thaliana] (TAI   | >0.05 | 0.007 | 2.529 | 6.017 | 1.202 | 1.831 |
| 763 | At3g28210   | PMZ; zinc ion binding                                    | >0.05 | 0.007 | 1.472 | 2.135 | 1.171 | 1.207 |
| 764 | At1g48605   | ATHAL3B (Arabidopsis thaliana Hal3-like protein B); ele  | 0.033 | 0.002 | 1.755 | 2.373 | 1.191 | 1.379 |
| 765 | At1g51090   | heavy-metal-associated domain-containing protein         | >0.05 | 0.038 | 1.937 | 2.434 | 1.207 | 1.204 |
| 766 | At1g75280   | isoflavone reductase, putative                           | >0.05 | 0.010 | 2.456 | 2.789 | 1.188 | 1.430 |
| 767 | At3g54530   | similar to unknown protein [Arabidopsis thaliana] (TAI   | >0.05 | 0.007 | 2.331 | 3.624 | 1.114 | 1.441 |
| 768 | At4g16146   | similar to unknown protein [Arabidopsis thaliana] (TAI   | >0.05 | 0.013 | 1.958 | 2.501 | 0.993 | 1.271 |
| 769 | At2g18860   | syntaxin family protein                                  | 0.009 | 0.001 | 1.778 | 2.142 | 1.049 | 1.033 |
| 770 | At2g38465   | similar to unnamed protein product [Vitis vinifera] (GB  | >0.05 | 0.014 | 1.751 | 2.444 | 1.101 | 1.089 |
| 771 | At5g42800   | DFR (DIHYDROFLAVONOL 4-REDUCTASE); dihydrokaer           | >0.05 | 0.002 | 4.408 | 5.150 | 2.508 | 1.731 |
| 772 | At4g37290   | similar to unknown protein [Arabidopsis thaliana] (TAI   | >0.05 | 0.021 | 2.380 | 3.148 | 1.767 | 1.413 |
| 773 | At4g28703   | similar to unknown protein [Arabidopsis thaliana] (TAI   | >0.05 | 0.001 | 1.880 | 2.308 | 1.433 | 1.398 |
| 774 | At5g50800   | nodulin MtN3 family protein                              | >0.05 | 0.005 | 2.046 | 2.553 | 1.487 | 1.180 |
| 775 | At3g05400   | sugar transporter, putative                              | >0.05 | 0.002 | 2.362 | 3.499 | 1.508 | 1.556 |
| 776 | At4g23990   | ATCSLG3 (Cellulose synthase-like G3); transferase/ trar  | >0.05 | 0.003 | 2.329 | 3.201 | 1.499 | 1.376 |



|     |           |                                                          |       |       |       |       |       |       |
|-----|-----------|----------------------------------------------------------|-------|-------|-------|-------|-------|-------|
| 777 | At3g60140 | DIN2 (DARK INDUCIBLE 2); hydrolase, hydrolyzing O-gl     | >0.05 | 0.007 | 2.156 | 3.184 | 1.564 | 1.392 |
| 778 | At4g21920 | unknown protein                                          | >0.05 | 0.007 | 1.571 | 2.030 | 1.364 | 1.193 |
| 779 | At5g26220 | ChaC-like family protein                                 | >0.05 | 0.012 | 2.267 | 2.702 | 1.402 | 1.859 |
| 780 | At3g60420 | similar to unknown protein [Arabidopsis thaliana] (TAIR  | >0.05 | 0.009 | 2.334 | 2.538 | 1.344 | 1.985 |
| 781 | At5g48850 | male sterility MS5 family protein                        | >0.05 | 0.015 | 2.379 | 2.438 | 1.225 | 1.760 |
| 782 | At3g49580 | similar to unknown protein [Arabidopsis thaliana] (TAIR  | >0.05 | 0.006 | 2.161 | 2.149 | 1.211 | 1.582 |
| 783 | At1g66380 | MYB114 (myb domain protein 114); DNA binding / trar      | >0.05 | 0.002 | 2.374 | 2.656 | 1.167 | 2.102 |
| 784 | At5g54610 | ANK (ANKYRIN); protein binding                           | >0.05 | 0.014 | 3.804 | 3.820 | 2.047 | 1.883 |
| 785 | At4g36880 | CP1 (CYSTEINE PROTEINASE1); cysteine-type peptidase      | >0.05 | 0.004 | 2.581 | 2.316 | 1.454 | 1.701 |
| 786 | At1g53610 | similar to unknown protein [Arabidopsis thaliana] (TAIR  | >0.05 | 0.001 | 2.123 | 2.041 | 1.293 | 1.364 |
| 787 | At2g44460 | glycosyl hydrolase family 1 protein                      | >0.05 | 0.006 | 3.076 | 3.768 | 1.509 | 1.796 |
| 788 | At1g56650 | PAP1 (PRODUCTION OF ANTHOCYANIN PIGMENT 1); D            | >0.05 | 0.005 | 2.400 | 3.608 | 1.090 | 1.965 |
| 789 | At2g38823 | similar to unknown protein [Arabidopsis thaliana] (TAIR  | 0.028 | 0.001 | 2.428 | 4.816 | 1.340 | 2.721 |
| 790 | At3g01970 | WRKY45 (WRKY DNA-binding protein 45); transcription      | 0.049 | 0.002 | 1.649 | 2.195 | 1.113 | 1.728 |
| 791 | At3g22370 | AOX1A (alternative oxidase 1A); alternative oxidase      | 0.019 | 0.001 | 1.596 | 2.142 | 1.065 | 1.655 |
| 792 | At5g40070 | similar to AGL81/EMB3008 (EMBRYO DEFECTIVE 3008)         | >0.05 | 0.018 | 3.904 | 2.605 | 1.700 | 0.870 |
| 793 | At5g54060 | UF3GT (UDP-GLUCOSE:FLAVONOID 3-O-GLUCOSYLTRA             | >0.05 | 0.029 | 4.042 | 3.996 | 1.401 | 1.226 |
| 794 | At3g30590 | transposable element gene                                | >0.05 | 0.042 | 3.336 | 2.440 | 1.602 | 1.082 |
| 795 | At4g22870 | leucoanthocyanidin dioxygenase, putative / anthocyan     | >0.05 | 0.003 | 4.487 | 3.786 | 2.079 | 1.300 |
| 796 | At3g19620 | glycosyl hydrolase family 3 protein                      | >0.05 | 0.048 | 2.001 | 1.472 | 1.345 | 1.237 |
| 797 | At5g51580 | unknown protein                                          | >0.05 | 0.011 | 2.244 | 1.729 | 2.420 | 0.973 |
| 798 | At5g05340 | peroxidase, putative                                     | >0.05 | 0.024 | 1.205 | 1.151 | 2.802 | 2.649 |
| 799 | At4g24110 | similar to unnamed protein product [Vitis vinifera] (GB  | >0.05 | 0.008 | 1.171 | 1.098 | 2.207 | 2.055 |
| 800 | At5g28300 | trihelix DNA-binding protein, putative                   | >0.05 | 0.018 | 1.142 | 1.071 | 2.300 | 2.196 |
| 801 | At2g42610 | similar to unknown protein [Arabidopsis thaliana] (TAIR  | >0.05 | 0.004 | 1.142 | 1.043 | 2.456 | 2.405 |
| 802 | At3g12145 | FLR1 (FLOR1); enzyme inhibitor                           | >0.05 | 0.011 | 1.098 | 1.022 | 2.226 | 2.273 |
| 803 | At5g57240 | oxysterol-binding family protein                         | >0.05 | 0.022 | 1.319 | 0.981 | 2.447 | 2.407 |
| 804 | At2g02010 | GAD4 (GLUTAMATE DECARBOXYLASE 4); calmodulin bi          | >0.05 | 0.050 | 1.271 | 1.002 | 1.975 | 2.134 |
| 805 | At1g53170 | ATERF-8/ATERF8 (ETHYLENE RESPONSE ELEMENT BIND           | >0.05 | 0.004 | 1.435 | 1.045 | 2.418 | 2.080 |
| 806 | At1g67860 | similar to unknown protein [Arabidopsis thaliana] (TAIR  | >0.05 | 0.010 | 1.304 | 0.965 | 2.057 | 1.789 |
| 807 | At1g66400 | calmodulin-related protein, putative                     | 0.011 | 0.002 | 1.078 | 0.924 | 2.233 | 1.933 |
| 808 | At5g21960 | AP2 domain-containing transcription factor, putative     | >0.05 | 0.042 | 1.224 | 1.037 | 2.259 | 1.814 |
| 809 | At1g06350 | fatty acid desaturase family protein                     | 0.011 | 0.001 | 1.215 | 1.059 | 5.150 | 3.127 |
| 810 | At4g15210 | ATBETA-AMY (BETA-AMYLASE); beta-amylase                  | 0.008 | 0.000 | 1.494 | 1.005 | 8.108 | 3.808 |
| 811 | At3g10930 | similar to unknown protein [Arabidopsis thaliana] (TAIR  | 0.018 | 0.002 | 1.225 | 1.086 | 2.527 | 1.774 |
| 812 | At1g20620 | CAT3 (CATALASE 3); catalase                              | >0.05 | 0.020 | 1.146 | 1.132 | 2.520 | 1.783 |
| 813 | At4g22470 | protease inhibitor/seed storage/lipid transfer protein ( | >0.05 | 0.017 | 1.154 | 1.081 | 2.496 | 1.692 |
| 814 | At1g72260 | THI2.1 (THIONIN 2.1); toxin receptor binding             | >0.05 | 0.019 | 1.069 | 1.202 | 3.072 | 2.420 |
| 815 | At2g44840 | ATERF13/EREBP (ETHYLENE-RESPONSIVE ELEMENT BIN           | 0.042 | 0.004 | 1.076 | 1.212 | 2.600 | 2.156 |
| 816 | At5g02230 | haloacid dehalogenase-like hydrolase family protein      | >0.05 | 0.033 | 0.933 | 1.175 | 2.268 | 2.020 |
| 817 | At2g18480 | mannitol transporter, putative                           | >0.05 | 0.024 | 1.018 | 1.269 | 2.390 | 1.701 |
| 818 | At2g24600 | ankyrin repeat family protein                            | 0.018 | 0.004 | 0.871 | 1.229 | 2.648 | 1.746 |
| 819 | At5g15160 | bHLH family protein                                      | 0.012 | 0.003 | 1.063 | 0.876 | 3.015 | 1.963 |
| 820 | At4g25470 | CBF2 (FREEZING TOLERANCE QTL 4); DNA binding / tra       | 0.028 | 0.017 | 1.099 | 0.758 | 3.837 | 2.188 |
| 821 | At4g29780 | similar to unknown protein [Arabidopsis thaliana] (TAIR  | 0.049 | 0.041 | 1.078 | 0.806 | 2.537 | 1.748 |
| 822 | At2g46510 | basic helix-loop-helix (bHLH) family protein             | 0.026 | 0.012 | 1.015 | 0.953 | 2.085 | 1.462 |
| 823 | At4g36220 | FAH1 (FERULATE-5-HYDROXYLASE 1); ferulate 5-hydro        | >0.05 | 0.042 | 1.079 | 0.958 | 2.139 | 1.428 |
| 824 | At3g15210 | ATERF-4/ATERF4/ERF4/RAP2.5 (ETHYLENE RESPONSIVE          | 0.027 | 0.013 | 1.155 | 0.877 | 2.128 | 1.468 |
| 825 | At4g25490 | CBF1 (C-REPEAT/DRE BINDING FACTOR 1); DNA binding        | 0.021 | 0.005 | 1.507 | 0.717 | 9.732 | 3.002 |

|     |           |                                                         |       |       |       |       |       |       |
|-----|-----------|---------------------------------------------------------|-------|-------|-------|-------|-------|-------|
| 826 | At3g61820 | aspartyl protease family protein                        | 0.035 | 0.048 | 1.166 | 0.758 | 2.235 | 1.460 |
| 827 | At5g15970 | KIN2 (COLD-RESPONSIVE 6.6)                              | >0.05 | 0.008 | 1.283 | 1.170 | 2.361 | 1.430 |
| 828 | At2g41180 | sigA-binding protein-related                            | >0.05 | 0.009 | 1.325 | 1.111 | 2.274 | 1.402 |
| 829 | At3g44860 | FAMT (FARNESOIC ACID CARBOXYL-O-METHYLTRANSFI           | >0.05 | 0.009 | 2.026 | 1.213 | 6.297 | 2.530 |
| 830 | At4g29190 | zinc finger (CCCH-type) family protein                  | >0.05 | 0.006 | 1.277 | 1.101 | 2.284 | 1.538 |
| 831 | At5g66120 | 3-dehydroquinase synthase, putative                     | >0.05 | 0.010 | 1.381 | 1.164 | 2.102 | 1.667 |
| 832 | At2g26440 | pectinesterase family protein                           | >0.05 | 0.003 | 1.600 | 1.337 | 3.903 | 2.223 |
| 833 | At1g19210 | AP2 domain-containing transcription factor, putative    | >0.05 | 0.007 | 1.494 | 1.209 | 2.691 | 1.684 |
| 834 | At5g51990 | CBF4/DREB1D (C- REPEAT-BINDING FACTOR 4); DNA bi        | 0.021 | 0.003 | 1.230 | 1.194 | 3.468 | 1.589 |
| 835 | At1g59950 | aldo/keto reductase, putative                           | >0.05 | 0.040 | 1.393 | 1.301 | 2.756 | 1.558 |
| 836 | At3g56070 | ROC2 (rotamase CyP 2); peptidyl-prolyl cis-trans isome  | >0.05 | 0.006 | 1.247 | 1.222 | 2.034 | 1.373 |
| 837 | At2g31880 | leucine-rich repeat transmembrane protein kinase, put   | 0.046 | 0.003 | 1.278 | 1.262 | 2.386 | 1.450 |
| 838 | At3g02840 | immediate-early fungal elicitor family protein          | >0.05 | 0.006 | 1.335 | 1.685 | 5.698 | 2.328 |
| 839 | At4g34410 | AP2 domain-containing transcription factor, putative    | >0.05 | 0.030 | 1.200 | 1.366 | 3.041 | 1.637 |
| 840 | At1g74010 | strictosidine synthase family protein                   | >0.05 | 0.010 | 1.561 | 1.359 | 2.824 | 1.569 |
| 841 | At4g14450 | Identical to Uncharacterized protein At4g14450, chloroc | >0.05 | 0.022 | 2.113 | 1.589 | 5.693 | 1.717 |
| 842 | At3g13857 | unknown protein                                         | 0.049 | 0.004 | 1.651 | 1.479 | 4.285 | 1.443 |
| 843 | At3g44870 | S-adenosyl-L-methionine:carboxyl methyltransferase fa   | >0.05 | 0.007 | 1.486 | 1.497 | 4.474 | 1.544 |
| 844 | At5g67080 | MAPKKK19 (Mitogen-activated protein kinase kinase ki    | 0.030 | 0.013 | 1.017 | 1.112 | 2.524 | 1.288 |
| 845 | At4g37490 | CYC1 (CYCLIN 1); cyclin-dependent protein kinase regul  | 0.034 | 0.016 | 1.073 | 1.103 | 2.198 | 1.139 |
| 846 | At4g28660 | PSB28 (PHOTOSYSTEM II REACTION CENTER PSB28 PRO         | 0.018 | 0.011 | 1.328 | 0.739 | 0.479 | 0.748 |
| 847 | At5g14740 | CA2 (BETA CARBONIC ANHYDRASE 2); carbonate dehydr       | 0.026 | 0.022 | 1.233 | 0.608 | 0.400 | 0.837 |
| 848 | At1g72830 | HAP2C (Heme activator protein (yeast) homolog 2C); tr   | >0.05 | 0.002 | 1.058 | 2.317 | 2.394 | 1.515 |
| 849 | At3g22235 | unknown protein                                         | 0.035 | 0.002 | 1.068 | 2.499 | 2.799 | 1.557 |
| 850 | At2g02850 | ARPN (PLANTACYANIN); copper ion binding                 | 0.040 | 0.002 | 1.096 | 2.542 | 2.917 | 1.701 |
| 851 | At2g08986 | similar to unknown protein [Arabidopsis thaliana] (TAIR | >0.05 | 0.020 | 1.219 | 3.421 | 3.896 | 1.805 |
| 852 | At3g62990 | similar to unknown protein [Arabidopsis thaliana] (TAIR | >0.05 | 0.004 | 1.140 | 2.024 | 2.011 | 1.478 |
| 853 | At3g28510 | AAA-type ATPase family protein                          | 0.031 | 0.002 | 1.164 | 3.098 | 2.972 | 1.577 |
| 854 | At3g54150 | embryo-abundant protein-related                         | >0.05 | 0.005 | 1.173 | 3.695 | 3.958 | 1.595 |
| 855 | At1g74080 | MYB122 (myb domain protein 122); DNA binding / tran     | 0.044 | 0.005 | 0.903 | 2.808 | 2.311 | 1.723 |
| 856 | At2g07981 | similar to unknown protein [Arabidopsis thaliana] (TAIR | >0.05 | 0.011 | 0.975 | 2.758 | 2.790 | 1.618 |
| 857 | At2g39370 | similar to unknown protein [Arabidopsis thaliana] (TAIR | >0.05 | 0.009 | 0.993 | 2.374 | 2.220 | 1.478 |
| 858 | At2g43590 | chitinase, putative                                     | 0.035 | 0.004 | 0.872 | 3.508 | 3.188 | 1.801 |
| 859 | At5g39120 | germin-like protein, putative                           | >0.05 | 0.003 | 1.028 | 3.393 | 2.990 | 2.709 |
| 860 | At3g04070 | ANAC047 (Arabidopsis NAC domain containing protein      | >0.05 | 0.002 | 1.099 | 2.266 | 2.156 | 2.071 |
| 861 | At5g39150 | germin-like protein, putative                           | 0.045 | 0.003 | 0.949 | 7.051 | 5.055 | 3.615 |
| 862 | At1g13480 | similar to unknown protein [Arabidopsis thaliana] (TAIR | 0.020 | 0.001 | 0.999 | 2.291 | 2.029 | 1.817 |
| 863 | At3g19200 | similar to unknown protein [Arabidopsis thaliana] (TAIR | 0.027 | 0.002 | 0.979 | 2.181 | 1.800 | 1.633 |
| 864 | At4g23700 | ATCHX17 (CATION/H+ EXCHANGER 17); monovalent ca         | >0.05 | 0.004 | 1.092 | 2.663 | 2.166 | 1.946 |
| 865 | At5g42830 | transferase family protein                              | >0.05 | 0.005 | 1.029 | 2.718 | 2.804 | 1.919 |
| 866 | At1g09932 | phosphoglycerate/bisphosphoglycerate mutase-relate      | >0.05 | 0.004 | 0.996 | 2.068 | 2.137 | 1.612 |
| 867 | At1g69920 | ATGSTU12 (Arabidopsis thaliana Glutathione S-transfe    | 0.046 | 0.002 | 1.055 | 2.475 | 2.324 | 1.822 |
| 868 | At5g18470 | curculin-like (mannose-binding) lectin family protein   | >0.05 | 0.006 | 1.283 | 1.818 | 3.796 | 2.241 |
| 869 | At3g28930 | AIG2 (AVRRPT2-INDUCED GENE 2)                           | >0.05 | 0.004 | 1.230 | 1.632 | 2.880 | 1.775 |
| 870 | At5g46295 | unknown protein                                         | 0.032 | 0.002 | 1.117 | 1.301 | 2.011 | 1.455 |
| 871 | At5g64905 | PROPEP3 (Elicitor peptide 3 precursor)                  | 0.043 | 0.002 | 1.064 | 1.643 | 2.351 | 1.619 |
| 872 | At1g08430 | ALMT1/ATALMT1 (AL-ACTIVATED MALATE TRANSPORT            | >0.05 | 0.007 | 1.186 | 2.413 | 5.117 | 2.397 |
| 873 | At2g39510 | nodulin MtN21 family protein                            | >0.05 | 0.013 | 1.200 | 2.232 | 4.633 | 2.246 |
| 874 | At2g39350 | ABC transporter family protein                          | >0.05 | 0.007 | 1.106 | 1.759 | 2.838 | 1.687 |

|     |           |                                                                         |       |       |       |       |       |       |
|-----|-----------|-------------------------------------------------------------------------|-------|-------|-------|-------|-------|-------|
| 875 | At5g65300 | unknown protein                                                         | 0.027 | 0.003 | 1.158 | 1.491 | 3.023 | 1.353 |
| 876 | At1g58420 | similar to unknown protein [Arabidopsis thaliana] (TAIR                 | >0.05 | 0.007 | 1.046 | 1.383 | 2.435 | 1.438 |
| 877 | At3g23250 | AtMYB15/AtY19/MYB15 (myb domain protein 15); DN                         | >0.05 | 0.007 | 1.116 | 1.932 | 5.802 | 1.994 |
| 878 | At1g59730 | ATH7 (thioredoxin H-type 7); thiol-disulfide exchange in                | 0.028 | 0.004 | 0.973 | 1.540 | 2.522 | 1.355 |
| 879 | At3g47540 | chitinase, putative                                                     | >0.05 | 0.008 | 0.955 | 1.459 | 2.129 | 1.348 |
| 880 | At1g24909 | anthranilate synthase beta subunit, putative                            | 0.031 | 0.004 | 0.981 | 1.459 | 2.040 | 1.321 |
| 881 | At3g13650 | disease resistance response                                             | >0.05 | 0.011 | 1.016 | 1.485 | 2.373 | 1.440 |
| 882 | At4g01360 | similar to BPS1 (BYPASS 1) [Arabidopsis thaliana] (TAIR                 | >0.05 | 0.018 | 1.005 | 1.597 | 2.685 | 1.505 |
| 883 | At1g25155 | anthranilate synthase beta subunit, putative                            | 0.027 | 0.003 | 0.949 | 1.375 | 2.041 | 1.393 |
| 884 | At5g22500 | acyl CoA reductase, putative / male-sterility protein, putative         | 0.045 | 0.012 | 0.800 | 1.743 | 2.231 | 1.707 |
| 885 | At3g12500 | ATHCHIB (BASIC CHITINASE); chitinase                                    | >0.05 | 0.014 | 0.798 | 2.113 | 3.061 | 2.051 |
| 886 | At1g30135 | JAZ8/TIFY5A (JASMONATE-ZIM-DOMAIN PROTEIN 8)                            | >0.05 | 0.007 | 0.964 | 2.186 | 3.365 | 1.838 |
| 887 | At5g59490 | haloacid dehalogenase-like hydrolase family protein                     | >0.05 | 0.021 | 0.931 | 1.660 | 2.437 | 1.506 |
| 888 | At1g69930 | ATGSTU11 (Arabidopsis thaliana Glutathione S-transferase                | >0.05 | 0.017 | 0.871 | 1.777 | 2.575 | 1.597 |
| 889 | At2g38860 | YLS5 (yellow-leaf-specific gene 5)                                      | 0.022 | 0.001 | 0.871 | 2.226 | 3.393 | 1.935 |
| 890 | At5g25460 | similar to unknown protein [Arabidopsis thaliana] (TAIR                 | >0.05 | 0.018 | 0.889 | 1.378 | 2.010 | 1.494 |
| 891 | At3g45960 | ATEXLA3 (ARABIDOPSIS THALIANA EXPANSIN-LIKE A3)                         | 0.035 | 0.008 | 0.805 | 1.633 | 2.887 | 1.768 |
| 892 | At5g57510 | unknown protein                                                         | >0.05 | 0.022 | 0.818 | 1.512 | 2.146 | 1.787 |
| 893 | At5g53990 | glycosyltransferase family protein                                      | >0.05 | 0.026 | 0.889 | 2.122 | 2.247 | 1.809 |
| 894 | At4g13420 | HAK5 (High affinity K <sup>+</sup> transporter 5); potassium ion transp | >0.05 | 0.044 | 0.880 | 2.404 | 2.472 | 2.225 |
| 895 | At3g53150 | UGT73D1 (UDP-GLUCOSYL TRANSFERASE 73D1); UDP-gluc                       | >0.05 | 0.012 | 0.968 | 2.238 | 2.301 | 2.273 |
| 896 | At2g43660 | glycosyl hydrolase family protein 17                                    | >0.05 | 0.002 | 0.981 | 1.871 | 2.175 | 1.863 |
| 897 | At3g26830 | PAD3 (PHYTOALEXIN DEFICIENT 3); oxygen binding                          | >0.05 | 0.036 | 1.036 | 2.678 | 3.846 | 2.522 |
| 898 | At4g20000 | VQ motif-containing protein                                             | >0.05 | 0.004 | 0.991 | 1.898 | 2.689 | 2.044 |
| 899 | At3g48580 | xyloglucan:xyloglucosyl transferase, putative / xylogluc                | 0.027 | 0.002 | 0.912 | 2.308 | 2.908 | 1.966 |
| 900 | At5g25440 | protein kinase family protein                                           | 0.031 | 0.006 | 0.832 | 1.889 | 2.686 | 1.317 |
| 901 | At4g08780 | peroxidase, putative                                                    | >0.05 | 0.020 | 0.669 | 2.511 | 4.670 | 1.812 |
| 902 | At4g14630 | GLP9 (GERMIN-LIKE PROTEIN 9); manganese ion binding                     | 0.024 | 0.011 | 0.722 | 1.923 | 2.741 | 1.379 |
| 903 | At5g45090 | ATPP2-A7 (Phloem protein 2-A7); transmembrane rece                      | 0.035 | 0.008 | 0.811 | 1.894 | 2.198 | 1.467 |
| 904 | At1g35910 | trehalose-6-phosphate phosphatase, putative                             | 0.035 | 0.007 | 0.708 | 2.807 | 4.460 | 1.861 |
| 905 | At3g48850 | mitochondrial phosphate transporter, putative                           | 0.021 | 0.005 | 0.777 | 1.880 | 2.163 | 1.352 |
| 906 | At5g49630 | AAP6 (AMINO ACID PERMEASE 6); amino acid transme                        | >0.05 | 0.008 | 0.927 | 2.140 | 2.898 | 1.563 |
| 907 | At3g09950 | similar to unknown protein [Arabidopsis thaliana] (TAIR                 | 0.017 | 0.002 | 0.919 | 2.145 | 2.837 | 1.329 |
| 908 | At2g18780 | F-box family protein                                                    | >0.05 | 0.049 | 0.994 | 1.443 | 2.017 | 1.077 |
| 909 | At3g04720 | PR4 (PATHOGENESIS-RELATED 4)                                            | >0.05 | 0.018 | 0.891 | 1.792 | 2.881 | 1.255 |
| 910 | At4g37710 | VQ motif-containing protein                                             | >0.05 | 0.033 | 0.898 | 1.694 | 3.119 | 1.325 |
| 911 | At5g38700 | similar to unknown protein [Arabidopsis thaliana] (TAIR                 | >0.05 | 0.037 | 0.757 | 1.498 | 2.031 | 1.426 |
| 912 | At4g08770 | peroxidase, putative                                                    | 0.048 | 0.042 | 0.611 | 1.681 | 2.821 | 1.840 |
| 913 | At3g13610 | oxidoreductase, 2OG-Fe(II) oxygenase family protein                     | 0.050 | 0.026 | 0.778 | 1.566 | 2.381 | 1.446 |
| 914 | At3g54640 | TSA1 (TRYPTOPHAN SYNTHASE ALPHA CHAIN); tryptop                         | 0.023 | 0.010 | 0.773 | 1.515 | 2.593 | 1.388 |
| 915 | At4g19980 | unknown protein                                                         | 0.033 | 0.041 | 0.551 | 1.630 | 3.905 | 1.575 |
| 916 | At2g46650 | B5 #1 (cytochrome b5 family protein #1); heme binding                   | 0.018 | 0.011 | 0.694 | 1.308 | 2.097 | 1.823 |
| 917 | At5g06720 | peroxidase, putative                                                    | >0.05 | 0.019 | 1.028 | 1.388 | 2.009 | 2.266 |
| 918 | At1g52040 | MBP1 (MYROSINASE-BINDING PROTEIN 1)                                     | 0.041 | 0.002 | 1.252 | 2.410 | 9.920 | 7.977 |
| 919 | At2g26530 | AR781                                                                   | >0.05 | 0.007 | 1.185 | 1.204 | 1.739 | 2.042 |
| 920 | At4g30180 | transcription factor/ transcription regulator                           | >0.05 | 0.007 | 1.206 | 1.282 | 2.183 | 3.094 |
| 921 | At4g35720 | similar to unknown protein [Arabidopsis thaliana] (TAIR                 | >0.05 | 0.002 | 1.388 | 1.595 | 2.324 | 3.617 |
| 922 | At5g20190 | binding                                                                 | >0.05 | 0.006 | 1.689 | 1.288 | 2.113 | 1.839 |
| 923 | At5g45350 | proline-rich family protein                                             | >0.05 | 0.002 | 1.585 | 1.338 | 2.095 | 1.650 |

|     |           |                                                          |       |       |       |       |       |       |
|-----|-----------|----------------------------------------------------------|-------|-------|-------|-------|-------|-------|
| 924 | At2g34810 | FAD-binding domain-containing protein                    | >0.05 | 0.026 | 1.514 | 1.323 | 2.008 | 1.861 |
| 925 | At1g17745 | PGDH (3-PHOSPHOGLYCERATE DEHYDROGENASE); phc             | >0.05 | 0.000 | 1.562 | 1.420 | 2.237 | 2.018 |
| 926 | At3g45140 | LOX2 (LIPOXYGENASE 2)                                    | >0.05 | 0.007 | 2.238 | 1.946 | 5.202 | 4.258 |
| 927 | At4g27654 | unknown protein                                          | >0.05 | 0.004 | 1.472 | 1.351 | 2.196 | 1.790 |
| 928 | At5g53030 | similar to unknown protein [Arabidopsis thaliana] (TAIR  | >0.05 | 0.001 | 1.593 | 1.504 | 2.124 | 2.028 |
| 929 | At3g55130 | ATWBC19 (WHITE-BROWN COMPLEX HOMOLOG 19); /              | >0.05 | 0.004 | 1.949 | 1.568 | 2.619 | 2.695 |
| 930 | At4g25480 | DREB1A (DEHYDRATION RESPONSE ELEMENT B1A); DN            | >0.05 | 0.002 | 2.513 | 1.860 | 3.135 | 3.526 |
| 931 | At5g42380 | CML37/CML39; calcium ion binding                         | >0.05 | 0.003 | 1.557 | 1.743 | 2.896 | 2.630 |
| 932 | At1g52890 | ANACO19 (Arabidopsis NAC domain containing protein       | >0.05 | 0.002 | 1.950 | 2.578 | 5.860 | 4.444 |
| 933 | At1g64360 | unknown protein                                          | 0.039 | 0.000 | 1.900 | 2.623 | 5.986 | 4.792 |
| 934 | At1g80840 | WRKY40 (WRKY DNA-binding protein 40); transcription      | >0.05 | 0.004 | 1.370 | 1.443 | 2.338 | 2.066 |
| 935 | At1g60190 | armadillo/beta-catenin repeat family protein / U-box d   | >0.05 | 0.004 | 1.382 | 1.687 | 3.260 | 2.472 |
| 936 | At4g17470 | palmitoyl protein thioesterase family protein            | >0.05 | 0.006 | 1.412 | 1.884 | 4.095 | 3.074 |
| 937 | At2g22880 | VQ motif-containing protein                              | >0.05 | 0.001 | 1.383 | 1.534 | 2.647 | 2.090 |
| 938 | At1g75040 | PR5 (PATHOGENESIS-RELATED GENE 5)                        | >0.05 | 0.002 | 1.705 | 1.628 | 3.568 | 2.192 |
| 939 | At2g06050 | OPR3 (OPDA-REDUCTASE 3); 12-oxophytodienoate red         | >0.05 | 0.013 | 1.502 | 1.485 | 2.912 | 1.936 |
| 940 | At2g26560 | PLP2 (PHOSPHOLIPASE A 2A); nutrient reservoir            | >0.05 | 0.005 | 1.597 | 1.586 | 2.988 | 2.093 |
| 941 | At5g42530 | unknown protein                                          | >0.05 | 0.005 | 1.636 | 1.480 | 2.732 | 2.946 |
| 942 | At3g25760 | AOC1 (ALLENE OXIDE CYCLASE 1)                            | >0.05 | 0.010 | 1.452 | 1.326 | 2.080 | 2.261 |
| 943 | At4g23600 | COR13 (CORONATINE INDUCED 1, JASMONIC ACID RESI          | >0.05 | 0.000 | 2.235 | 1.941 | 5.619 | 5.723 |
| 944 | At4g14365 | zinc finger (C3HC4-type RING finger) family protein / ar | >0.05 | 0.005 | 1.597 | 1.602 | 2.740 | 3.198 |
| 945 | At2g41090 | calmodulin-like calcium-binding protein, 22 kDa (CaBP-   | >0.05 | 0.002 | 2.008 | 1.533 | 2.816 | 3.418 |
| 946 | At1g24020 | MLP423 (MLP-LIKE PROTEIN 423)                            | >0.05 | 0.004 | 1.539 | 1.404 | 2.060 | 2.519 |
| 947 | At2g02990 | RNS1 (RIBONUCLEASE 1); endoribonuclease                  | >0.05 | 0.001 | 2.006 | 2.785 | 4.719 | 6.934 |
| 948 | At2g38530 | LTP2 (LIPID TRANSFER PROTEIN 2); lipid binding           | >0.05 | 0.002 | 1.603 | 2.168 | 4.017 | 5.000 |
| 949 | At5g22250 | CCR4-NOT transcription complex protein, putative         | >0.05 | 0.012 | 1.241 | 1.162 | 2.160 | 1.649 |
| 950 | At2g39030 | GCN5-related N-acetyltransferase (GNAT) family protei    | >0.05 | 0.004 | 1.676 | 1.691 | 6.013 | 3.459 |
| 951 | At1g61340 | F-box family protein                                     | >0.05 | 0.004 | 1.372 | 1.438 | 4.206 | 3.347 |
| 952 | At2g15050 | LTP; lipid binding                                       | 0.032 | 0.000 | 1.400 | 1.180 | 3.144 | 2.256 |
| 953 | At2g22500 | mitochondrial substrate carrier family protein           | >0.05 | 0.007 | 1.332 | 1.209 | 3.523 | 2.547 |
| 954 | At5g36220 | CYP81D1 (CYTOCHROME P450 91A1); oxygen binding           | >0.05 | 0.005 | 1.531 | 1.510 | 2.925 | 2.749 |
| 955 | At4g08870 | arginase, putative                                       | >0.05 | 0.008 | 1.565 | 1.402 | 3.023 | 2.678 |
| 956 | At4g08170 | inositol 1,3,4-trisphosphate 5/6-kinase family protein   | >0.05 | 0.009 | 1.279 | 1.391 | 2.292 | 1.997 |
| 957 | At4g23810 | WRKY53 (WRKY DNA-binding protein 53); DNA binding        | >0.05 | 0.006 | 1.287 | 1.304 | 2.232 | 1.974 |
| 958 | At1g76640 | calmodulin-related protein, putative                     | >0.05 | 0.007 | 1.473 | 1.242 | 2.835 | 2.323 |
| 959 | At1g78490 | CYP708A3 (cytochrome P450, family 708, subfamily A,      | >0.05 | 0.005 | 1.409 | 1.273 | 2.730 | 2.276 |
| 960 | At5g22580 | Identical to Uncharacterized protein At5g22580 [Arabi    | 0.036 | 0.002 | 1.227 | 1.157 | 2.105 | 2.149 |
| 961 | At5g25610 | RD22 (RESPONSIVE TO DESSICATION 22)                      | >0.05 | 0.008 | 1.299 | 1.199 | 2.377 | 2.391 |
| 962 | At2g41230 | unknown protein                                          | >0.05 | 0.005 | 1.286 | 1.198 | 2.266 | 2.253 |
| 963 | At1g54020 | myrosinase-associated protein, putative                  | 0.039 | 0.000 | 1.451 | 1.312 | 3.752 | 3.451 |
| 964 | At5g37600 | ATGSR1 (Arabidopsis thaliana glutamine synthase clon     | >0.05 | 0.012 | 1.273 | 1.120 | 2.064 | 2.023 |
| 965 | At3g50760 | GATL2 (Galacturonosyltransferase-like 2); polygalactur   | >0.05 | 0.024 | 1.394 | 1.216 | 2.238 | 2.544 |
| 966 | At1g17420 | LOX3 (Lipoxygenase 3); iron ion binding / lipoxygenase,  | >0.05 | 0.012 | 1.654 | 1.120 | 2.498 | 1.929 |
| 967 | At5g06730 | peroxidase, putative                                     | >0.05 | 0.002 | 1.450 | 2.803 | 5.665 | 3.226 |
| 968 | At5g22460 | esterase/lipase/thioesterase family protein              | >0.05 | 0.002 | 1.463 | 2.484 | 4.984 | 3.720 |
| 969 | At1g61380 | S-locus protein kinase, putative                         | >0.05 | 0.006 | 1.186 | 1.518 | 2.058 | 1.788 |
| 970 | At2g47190 | MYB2 (myb domain protein 2); DNA binding / transcrip     | >0.05 | 0.002 | 1.380 | 1.944 | 3.050 | 2.379 |
| 971 | At5g64810 | WRKY51 (WRKY DNA-binding protein 51); transcription      | >0.05 | 0.011 | 1.516 | 2.762 | 4.553 | 2.465 |
| 972 | At3g50900 | similar to unknown protein [Arabidopsis thaliana] (TAIR  | >0.05 | 0.006 | 1.189 | 1.734 | 2.108 | 1.665 |

|      |           |                                                          |       |       |       |       |       |       |
|------|-----------|----------------------------------------------------------|-------|-------|-------|-------|-------|-------|
| 973  | At1g19960 | similar to transmembrane receptor [Arabidopsis thaliana] | >0.05 | 0.001 | 1.542 | 2.664 | 4.012 | 2.687 |
| 974  | At2g46400 | WRKY46 (WRKY DNA-binding protein 46); transcription      | >0.05 | 0.004 | 1.246 | 2.298 | 2.916 | 2.363 |
| 975  | At4g15440 | HPL1 (HYDROPEROXIDE LYASE 1); heme binding / iron i      | >0.05 | 0.011 | 1.229 | 1.771 | 2.184 | 1.860 |
| 976  | At1g24575 | unknown protein                                          | >0.05 | 0.004 | 1.167 | 1.855 | 2.384 | 2.009 |
| 977  | At5g59320 | LTP3 (LIPID TRANSFER PROTEIN 3); lipid binding           | >0.05 | 0.002 | 2.366 | 5.826 | 9.914 | 5.657 |
| 978  | At4g39670 | glycolipid binding / glycolipid transporter              | >0.05 | 0.006 | 1.350 | 1.963 | 2.296 | 1.894 |
| 979  | At1g24145 | unknown protein                                          | >0.05 | 0.011 | 1.311 | 1.754 | 2.010 | 1.653 |
| 980  | At1g51420 | sucrose-phosphatase, putative                            | >0.05 | 0.012 | 1.310 | 1.922 | 2.103 | 1.693 |
| 981  | At2g30770 | CYP71A13 (CYTOCHROME P450, FAMILY 71, SUBFAMIL           | >0.05 | 0.006 | 1.825 | 3.056 | 4.278 | 2.468 |
| 982  | At4g01390 | meprin and TRAF homology domain-containing protei        | >0.05 | 0.004 | 1.370 | 1.989 | 2.270 | 1.660 |
| 983  | At1g28480 | GRX480; thiol-disulfide exchange intermediate            | >0.05 | 0.001 | 1.520 | 1.693 | 2.633 | 1.836 |
| 984  | At1g61800 | GPT2 (glucose-6-phosphate/phosphate translocator 2),     | >0.05 | 0.002 | 2.334 | 2.560 | 5.597 | 3.008 |
| 985  | At4g28490 | HAESA (RECEPTOR-LIKE PROTEIN KINASE 5); ATP bindir       | >0.05 | 0.038 | 1.471 | 1.477 | 2.188 | 1.645 |
| 986  | At5g66650 | similar to unknown protein [Arabidopsis thaliana] (TAI   | >0.05 | 0.002 | 1.895 | 1.917 | 3.150 | 2.081 |
| 987  | At3g57700 | protein kinase, putative                                 | >0.05 | 0.015 | 1.725 | 1.588 | 2.560 | 1.755 |
| 988  | At5g39670 | calcium-binding EF hand family protein                   | >0.05 | 0.002 | 1.646 | 2.213 | 3.312 | 2.376 |
| 989  | At1g11210 | similar to unknown protein [Arabidopsis thaliana] (TAI   | >0.05 | 0.001 | 1.646 | 1.840 | 2.627 | 2.057 |
| 990  | At5g25250 | similar to unknown protein [Arabidopsis thaliana] (TAI   | >0.05 | 0.008 | 1.355 | 1.508 | 2.377 | 1.509 |
| 991  | At4g36500 | similar to unknown protein [Arabidopsis thaliana] (TAI   | >0.05 | 0.002 | 1.383 | 1.476 | 2.186 | 1.450 |
| 992  | At2g14290 | F-box family protein                                     | >0.05 | 0.003 | 1.466 | 1.708 | 2.734 | 1.750 |
| 993  | At1g56580 | similar to unknown protein [Arabidopsis thaliana] (TAI   | >0.05 | 0.004 | 1.178 | 1.435 | 2.071 | 1.402 |
| 994  | At3g49550 | similar to unknown protein [Arabidopsis thaliana] (TAI   | >0.05 | 0.005 | 1.227 | 1.564 | 2.212 | 1.500 |
| 995  | At3g51895 | SULTR3;1 (SULFATE TRANSPORTER 1); sulfate transmer       | >0.05 | 0.018 | 1.312 | 1.622 | 2.646 | 1.643 |
| 996  | At5g06860 | PGIP1 (POLYGALACTURONASE INHIBITING PROTEIN 1);          | >0.05 | 0.004 | 1.321 | 1.967 | 1.783 | 2.583 |
| 997  | At1g68290 | ENDO 2 (ENDONUCLEASE 2); T/G mismatch-specific en        | >0.05 | 0.005 | 1.250 | 1.559 | 1.512 | 2.068 |
| 998  | At5g09800 | U-box domain-containing protein                          | >0.05 | 0.005 | 1.358 | 1.852 | 2.034 | 2.236 |
| 999  | At2g43530 | trypsin inhibitor, putative                              | >0.05 | 0.002 | 1.548 | 2.146 | 2.347 | 2.940 |
| 1000 | At1g56240 | ATPP2-B13 (Phloem protein 2-B13); carbohydrate bind      | >0.05 | 0.011 | 1.436 | 1.636 | 1.975 | 2.220 |
| 1001 | At4g26950 | similar to unknown protein [Arabidopsis thaliana] (TAI   | >0.05 | 0.002 | 2.098 | 2.215 | 3.050 | 3.753 |
| 1002 | At1g80130 | binding                                                  | >0.05 | 0.003 | 1.920 | 2.381 | 2.950 | 4.498 |
| 1003 | At2g25625 | similar to unnamed protein product [Vitis vinifera] (GB  | >0.05 | 0.000 | 2.200 | 2.927 | 3.293 | 5.829 |
| 1004 | At5g47220 | ATERF-2/ATERF2/ERF2 (ETHYLENE RESPONSE FACTOR :          | >0.05 | 0.004 | 1.453 | 1.414 | 1.713 | 2.137 |
| 1005 | At1g20990 | DC1 domain-containing protein                            | >0.05 | 0.010 | 1.887 | 1.870 | 2.350 | 3.348 |
| 1006 | At3g26180 | CYP71B20 (cytochrome P450, family 71, subfamily B, p     | >0.05 | 0.006 | 1.503 | 1.354 | 1.544 | 2.001 |
| 1007 | At1g02930 | ATGSTF6 (EARLY RESPONSIVE TO DEHYDRATION 11); gl         | >0.05 | 0.004 | 1.942 | 3.289 | 3.494 | 3.230 |
| 1008 | At1g76960 | unknown protein                                          | >0.05 | 0.002 | 1.555 | 2.193 | 2.485 | 2.315 |
| 1009 | At1g32350 | AOX1D (ALTERNATIVE OXIDASE 1D); alternative oxidas       | >0.05 | 0.001 | 1.944 | 2.775 | 3.576 | 2.872 |
| 1010 | At5g59220 | protein phosphatase 2C, putative / PP2C, putative        | >0.05 | 0.002 | 1.451 | 2.206 | 2.216 | 2.324 |
| 1011 | At2g28500 | LBD11 (LOB DOMAIN-CONTAINING PROTEIN 11)                 | >0.05 | 0.036 | 1.385 | 1.988 | 1.884 | 2.069 |
| 1012 | At5g38900 | DSBA oxidoreductase family protein                       | >0.05 | 0.004 | 2.341 | 3.311 | 3.872 | 3.240 |
| 1013 | At4g33040 | glutaredoxin family protein                              | >0.05 | 0.004 | 1.666 | 1.942 | 2.180 | 2.099 |
| 1014 | At3g47480 | calcium-binding EF hand family protein                   | >0.05 | 0.003 | 2.683 | 3.296 | 3.872 | 3.173 |
| 1015 | At1g65500 | similar to unknown protein [Arabidopsis thaliana] (TAI   | >0.05 | 0.021 | 1.980 | 2.249 | 2.344 | 2.402 |
| 1016 | At1g23730 | carbonic anhydrase, putative / carbonate dehydratase,    | >0.05 | 0.002 | 2.683 | 3.850 | 3.622 | 4.439 |
| 1017 | At2g41380 | embryo-abundant protein-related                          | >0.05 | 0.002 | 1.494 | 1.760 | 1.711 | 2.016 |
| 1018 | At4g23190 | CRK11 (CYSTEINE-RICH RLK11); kinase                      | >0.05 | 0.001 | 1.595 | 1.789 | 1.931 | 2.068 |
| 1019 | At5g47060 | senescence-associated protein-related                    | >0.05 | 0.001 | 1.941 | 2.020 | 2.772 | 2.416 |
| 1020 | At3g25770 | AOC2 (ALLENE OXIDE CYCLASE 2)                            | >0.05 | 0.003 | 3.011 | 3.104 | 5.006 | 4.611 |
| 1021 | At2g29350 | SAG13 (Senescence-associated gene 13); oxidoreducta      | >0.05 | 0.001 | 3.033 | 4.288 | 8.049 | 6.565 |

|      |           |                                                          |       |       |       |       |       |       |
|------|-----------|----------------------------------------------------------|-------|-------|-------|-------|-------|-------|
| 1022 | At2g29470 | ATGSTU3 (GLUTATHIONE S-TRANSFERASE 21); glutathione      | >0.05 | 0.004 | 2.638 | 3.750 | 6.978 | 6.061 |
| 1023 | At3g23240 | ATERF1/ERF1 (ETHYLENE RESPONSE FACTOR 1); DNA binding    | >0.05 | 0.001 | 1.749 | 2.129 | 2.773 | 2.845 |
| 1024 | At5g39030 | protein kinase family protein                            | >0.05 | 0.001 | 1.361 | 2.364 | 2.954 | 2.621 |
| 1025 | At5g39520 | similar to unknown protein [Arabidopsis thaliana] (TAIR) | >0.05 | 0.016 | 1.455 | 2.581 | 3.000 | 3.020 |
| 1026 | At1g47510 | endonuclease/exonuclease/phosphatase family protein      | >0.05 | 0.004 | 1.359 | 2.052 | 2.514 | 2.683 |
| 1027 | At1g69880 | ATH8 (thioredoxin H-type 8); thiol-disulfide exchange in | >0.05 | 0.003 | 1.818 | 3.262 | 5.042 | 5.149 |
| 1028 | At3g28580 | AAA-type ATPase family protein                           | >0.05 | 0.014 | 1.214 | 1.681 | 2.029 | 2.052 |
| 1029 | At4g22710 | CYP706A2 (cytochrome P450, family 706, subfamily A, CYP  | >0.05 | 0.010 | 1.291 | 1.652 | 2.086 | 1.966 |
| 1030 | At1g52000 | jacalin lectin family protein                            | >0.05 | 0.005 | 1.405 | 2.181 | 2.759 | 3.220 |
| 1031 | At3g50930 | AAA-type ATPase family protein                           | >0.05 | 0.004 | 1.256 | 1.692 | 1.979 | 2.216 |
| 1032 | At2g28400 | similar to unknown protein [Arabidopsis thaliana] (TAIR) | >0.05 | 0.005 | 1.212 | 1.683 | 2.101 | 2.329 |
| 1033 | At4g24380 | hydrolase, acting on ester bonds                         | >0.05 | 0.002 | 1.219 | 1.819 | 2.170 | 2.465 |
| 1034 | At1g63055 | similar to unknown protein [Arabidopsis thaliana] (TAIR) | >0.05 | 0.006 | 1.325 | 3.163 | 4.014 | 5.427 |
| 1035 | At2g23170 | GH3.3; indole-3-acetic acid amido synthetase             | >0.05 | 0.004 | 1.129 | 2.077 | 2.560 | 2.670 |
| 1036 | At2g44580 | protein binding / zinc ion binding                       | 0.034 | 0.001 | 1.097 | 2.529 | 3.253 | 2.947 |
| 1037 | At1g52565 | similar to unknown protein [Arabidopsis thaliana] (TAIR) | 0.035 | 0.002 | 1.052 | 1.760 | 1.643 | 2.063 |
| 1038 | At4g38410 | dehydrin, putative                                       | >0.05 | 0.004 | 1.249 | 2.892 | 2.353 | 4.109 |
| 1039 | At5g14780 | FDH (FORMATE DEHYDROGENASE); NAD binding / binding       | >0.05 | 0.006 | 1.875 | 1.472 | 2.060 | 1.729 |
| 1040 | At5g27420 | zinc finger (C3HC4-type RING finger) family protein      | >0.05 | 0.001 | 2.270 | 1.814 | 3.031 | 2.079 |
| 1041 | At5g63130 | octicosapeptide/Phox/Bem1p (PB1) domain-containing       | >0.05 | 0.005 | 1.825 | 1.637 | 2.083 | 1.985 |
| 1042 | At4g23170 | EP1; protein kinase                                      | >0.05 | 0.003 | 1.951 | 1.620 | 2.154 | 2.004 |
| 1043 | At3g14440 | NCED3 (NINE-CIS-EPOXYCAROTENOID DIOXYGENASE3)            | >0.05 | 0.012 | 1.912 | 1.311 | 2.002 | 1.614 |
| 1044 | At4g02520 | ATGSTF2 (Arabidopsis thaliana Glutathione S-transferase  | >0.05 | 0.008 | 1.764 | 1.359 | 2.459 | 1.584 |
| 1045 | At5g24860 | FPF1 (FLOWERING PROMOTING FACTOR 1)                      | >0.05 | 0.038 | 3.680 | 3.848 | 5.714 | 2.874 |
| 1046 | At2g42540 | COR15A (COLD-REGULATED 15A)                              | >0.05 | 0.000 | 2.480 | 2.888 | 3.697 | 2.175 |
| 1047 | At5g03210 | unknown protein                                          | >0.05 | 0.001 | 3.549 | 3.332 | 5.484 | 3.207 |
| 1048 | At2g42530 | COR15B                                                   | >0.05 | 0.004 | 2.670 | 2.355 | 2.843 | 1.987 |
| 1049 | At2g02930 | ATGSTF3 (GLUTATHIONE S-TRANSFERASE 16); glutathione      | >0.05 | 0.016 | 1.656 | 1.651 | 2.324 | 1.397 |
| 1050 | At4g14020 | rapid alkalization factor (RALF) family protein          | >0.05 | 0.002 | 1.917 | 2.006 | 2.851 | 1.552 |
| 1051 | At3g03530 | NPC4 (NONSPECIFIC PHOSPHOLIPASE C4); hydrolase, acting   | >0.05 | 0.002 | 2.295 | 1.967 | 3.270 | 1.736 |
| 1052 | At3g45350 | transposable element gene                                | >0.05 | 0.007 | 2.004 | 1.726 | 2.894 | 1.322 |
| 1053 | At4g35180 | LHT7 (LYS/HIS TRANSPORTER 7); amino acid transmembrane   | >0.05 | 0.013 | 2.606 | 1.898 | 3.605 | 1.330 |
| 1054 | At5g08790 | ATAF2 (Arabidopsis NAC domain containing protein 81)     | >0.05 | 0.002 | 1.805 | 1.631 | 1.280 | 2.020 |
| 1055 | At4g09020 | ATISA3/ISA3 (ISOAMYLASE 3); alpha-amylase                | >0.05 | 0.045 | 2.065 | 1.654 | 1.362 | 2.268 |
| 1056 | At5g22860 | serine carboxypeptidase S28 family protein               | >0.05 | 0.002 | 1.720 | 1.653 | 1.434 | 2.130 |
| 1057 | At4g12580 | unknown protein                                          | >0.05 | 0.031 | 1.601 | 1.584 | 1.318 | 2.045 |
| 1058 | At1g02850 | glycosyl hydrolase family 1 protein                      | >0.05 | 0.002 | 2.789 | 2.431 | 1.445 | 2.699 |
| 1059 | At1g26770 | ATEXPA10 (ARABIDOPSIS THALIANA EXPANSIN A10)             | >0.05 | 0.011 | 2.118 | 1.414 | 1.497 | 2.788 |
| 1060 | At1g29395 | COR414-TM1 (cold regulated 414 thylakoid membrane        | >0.05 | 0.002 | 1.743 | 1.556 | 1.365 | 2.439 |
| 1061 | At2g46640 | unknown protein                                          | >0.05 | 0.006 | 1.589 | 1.369 | 1.303 | 2.223 |
| 1062 | At1g71140 | MATE efflux family protein                               | >0.05 | 0.027 | 2.216 | 1.432 | 1.459 | 2.265 |
| 1063 | At3g25250 | AGC2-1 (OXIDATIVE SIGNAL-INDUCIBLE1); kinase             | >0.05 | 0.001 | 2.052 | 1.563 | 1.500 | 2.469 |
| 1064 | At5g17860 | CAX7 (CALCIUM EXCHANGER 7); calcium:sodium antiporter    | >0.05 | 0.003 | 2.865 | 1.807 | 2.581 | 3.464 |
| 1065 | At3g44310 | ATNIT1/NIT1/NITI (NITRILASE 1); nitrilase                | >0.05 | 0.008 | 1.875 | 1.375 | 1.641 | 2.381 |
| 1066 | At5g17760 | AAA-type ATPase family protein                           | >0.05 | 0.000 | 1.997 | 2.325 | 1.972 | 2.418 |
| 1067 | At5g53420 | similar to unknown protein [Arabidopsis thaliana] (TAIR) | >0.05 | 0.002 | 1.803 | 2.031 | 1.663 | 2.126 |
| 1068 | At1g21520 | unknown protein                                          | >0.05 | 0.001 | 1.969 | 2.663 | 2.035 | 2.451 |
| 1069 | At1g54575 | unknown protein                                          | >0.05 | 0.002 | 2.121 | 2.499 | 2.254 | 2.150 |
| 1070 | At3g56710 | SIB1 (SIGMA FACTOR BINDING PROTEIN 1); binding           | >0.05 | 0.002 | 2.698 | 2.443 | 2.505 | 2.446 |

|      |             |                                                           |       |       |       |       |       |       |
|------|-------------|-----------------------------------------------------------|-------|-------|-------|-------|-------|-------|
| 1071 | At1g31580   | ECS1                                                      | >0.05 | 0.017 | 1.823 | 1.736 | 1.642 | 2.228 |
| 1072 | At2g36970   | UDP-glucuronosyl/UDP-glucosyl transferase family pro      | >0.05 | 0.003 | 1.827 | 1.823 | 1.845 | 2.315 |
| 1073 | ath-MIR157b | miRNA gene Arabidopsis thaliana miR157b stem-loop         | >0.05 | 0.007 | 1.556 | 1.621 | 1.472 | 2.010 |
| 1074 | At2g37430   | zinc finger (C2H2 type) family protein (ZAT11)            | >0.05 | 0.001 | 1.855 | 2.089 | 1.823 | 2.627 |
| 1075 | At5g59310   | LTP4 (LIPID TRANSFER PROTEIN 4); lipid binding            | >0.05 | 0.002 | 2.914 | 4.971 | 3.274 | 6.907 |
| 1076 | At5g47070   | protein kinase, putative                                  | >0.05 | 0.002 | 1.467 | 1.578 | 1.464 | 2.044 |
| 1077 | At1g17180   | ATGSTU25 (Arabidopsis thaliana Glutathione S-transfer     | >0.05 | 0.007 | 1.470 | 1.703 | 1.581 | 2.418 |
| 1078 | At2g21640   | similar to unknown protein [Arabidopsis thaliana] (TAII   | >0.05 | 0.004 | 1.960 | 2.405 | 1.525 | 2.773 |
| 1079 | At3g46080   | zinc finger (C2H2 type) family protein                    | >0.05 | 0.005 | 1.743 | 2.215 | 1.534 | 2.263 |
| 1080 | At5g38200   | hydrolase                                                 | >0.05 | 0.005 | 3.008 | 1.569 | 2.355 | 2.087 |
| 1081 | At1g61550   | S-locus protein kinase, putative                          | >0.05 | 0.042 | 4.161 | 1.777 | 3.092 | 3.343 |
| 1082 | At4g12290   | copper amine oxidase, putative                            | >0.05 | 0.004 | 2.723 | 1.880 | 2.083 | 2.557 |
| 1083 | At1g64950   | CYP89A5 (cytochrome P450, family 87, subfamily A, po      | >0.05 | 0.021 | 2.360 | 1.624 | 1.635 | 1.718 |
| 1084 | At4g34710   | ADC2 (ARGININE DECARBOXYLASE 2)                           | >0.05 | 0.047 | 2.189 | 1.210 | 1.483 | 1.935 |
| 1085 | At5g54490   | PBP1 (PINOID-BINDING PROTEIN 1); calcium ion bindin       | 0.028 | 0.003 | 1.282 | 1.444 | 1.194 | 2.491 |
| 1086 | At1g72920   | disease resistance protein (TIR-NBS class), putative      | >0.05 | 0.007 | 1.365 | 1.576 | 1.343 | 2.666 |
| 1087 | At1g02470   | similar to unknown protein [Arabidopsis thaliana] (TAII   | >0.05 | 0.006 | 1.173 | 1.512 | 1.294 | 2.056 |
| 1088 | At1g34060   | alliinase family protein                                  | >0.05 | 0.043 | 1.339 | 1.515 | 1.061 | 2.543 |
| 1089 | At2g33380   | RD20 (RESPONSIVE TO DESSICATION 20); calcium ion b        | >0.05 | 0.005 | 1.827 | 2.712 | 1.457 | 3.834 |
| 1090 | At2g43500   | RWP-RK domain-containing protein                          | >0.05 | 0.010 | 1.457 | 1.854 | 1.100 | 2.439 |
| 1091 | At3g13130   | similar to hypothetical protein [Vitis vinifera] (GB:CAN7 | >0.05 | 0.038 | 1.432 | 1.572 | 1.143 | 2.221 |
| 1092 | At1g53870   | similar to unknown protein [Arabidopsis thaliana] (TAII   | >0.05 | 0.001 | 1.751 | 1.729 | 1.061 | 2.323 |
| 1093 | At1g53890   | similar to unknown protein [Arabidopsis thaliana] (TAII   | >0.05 | 0.008 | 1.866 | 1.703 | 1.121 | 2.257 |
| 1094 | At1g72900   | disease resistance protein (TIR-NBS class), putative      | 0.025 | 0.002 | 2.368 | 2.167 | 0.983 | 2.970 |
| 1095 | At2g04050   | MATE efflux family protein                                | >0.05 | 0.004 | 1.950 | 1.708 | 1.049 | 2.233 |
| 1096 | At1g59700   | ATGSTU16 (Arabidopsis thaliana Glutathione S-transfer     | 0.042 | 0.003 | 1.709 | 1.591 | 1.091 | 2.614 |
| 1097 | At2g03760   | ST (steroid sulfotransferase); sulfotransferase           | 0.047 | 0.005 | 1.668 | 1.441 | 0.997 | 2.197 |
| 1098 | At1g72910   | disease resistance protein (TIR-NBS class), putative      | 0.040 | 0.005 | 1.965 | 1.746 | 0.898 | 2.546 |
| 1099 | At4g15490   | UGT84A3; UDP-glycosyltransferase/ sinapate 1-glucosy      | 0.048 | 0.006 | 1.848 | 1.580 | 0.886 | 2.126 |
| 1100 | At4g01870   | tolB protein-related                                      | >0.05 | 0.010 | 3.019 | 1.384 | 1.099 | 2.317 |
| 1101 | At5g44580   | similar to unknown protein [Arabidopsis thaliana] (TAII   | >0.05 | 0.009 | 1.502 | 1.157 | 1.151 | 2.154 |
| 1102 | At3g52340   | SPP2; sucrose-phosphatase                                 | >0.05 | 0.008 | 1.644 | 1.215 | 1.309 | 2.468 |
| 1103 | At2g20870   | cell wall protein precursor, putative                     | 0.050 | 0.024 | 1.373 | 1.091 | 1.048 | 2.812 |
| 1104 | At5g58390   | peroxidase, putative                                      | >0.05 | 0.013 | 1.828 | 1.225 | 2.467 | 2.801 |
| 1105 | At4g11530   | protein kinase family protein                             | >0.05 | 0.004 | 1.796 | 1.183 | 1.873 | 2.679 |
| 1106 | At5g01180   | proton-dependent oligopeptide transport (POT) family      | >0.05 | 0.009 | 1.747 | 1.131 | 2.082 | 2.741 |
| 1107 | At3g18080   | glycosyl hydrolase family 1 protein                       | >0.05 | 0.005 | 1.333 | 1.130 | 1.511 | 2.008 |
| 1108 | At4g23060   | IQD22 (IQ-domain 22); calmodulin binding                  | >0.05 | 0.007 | 1.390 | 1.139 | 1.589 | 2.244 |
| 1109 | At4g37990   | ELI3-2 (ELICITOR-ACTIVATED GENE 3)                        | >0.05 | 0.007 | 2.006 | 0.915 | 2.263 | 2.906 |
| 1110 | At1g72940   | disease resistance protein (TIR-NBS class), putative      | >0.05 | 0.025 | 1.248 | 1.242 | 1.352 | 2.126 |
| 1111 | At1g75580   | auxin-responsive protein, putative                        | 0.025 | 0.003 | 1.154 | 1.098 | 1.387 | 2.066 |
| 1112 | At5g06870   | PGIP2 (POLYGALACTURONASE INHIBITING PROTEIN 2);           | 0.032 | 0.006 | 0.912 | 1.374 | 2.279 | 3.729 |
| 1113 | At2g29120   | ATGLR2.7 (Arabidopsis thaliana glutamate receptor 2.7     | >0.05 | 0.008 | 1.028 | 1.230 | 1.637 | 2.039 |
| 1114 | At5g50335   | unknown protein                                           | 0.013 | 0.002 | 1.085 | 0.946 | 3.330 | 5.096 |
| 1115 | At3g55240   | similar to unknown protein [Arabidopsis thaliana] (TAII   | 0.017 | 0.003 | 1.005 | 1.002 | 3.787 | 6.332 |
| 1116 | At1g19670   | ATCLH1 (CORONATINE-INDUCED PROTEIN 1)                     | 0.037 | 0.005 | 1.188 | 1.074 | 2.943 | 3.787 |
| 1117 | At4g02330   | ATPMEPCRB; pectinesterase                                 | >0.05 | 0.012 | 1.174 | 1.122 | 3.748 | 4.996 |
| 1118 | At2g29440   | ATGSTU6 (GLUTATHIONE S-TRANSFERASE 24); glutathi          | >0.05 | 0.022 | 1.042 | 1.079 | 1.545 | 2.054 |
| 1119 | At2g47780   | rubber elongation factor (REF) protein-related            | 0.035 | 0.005 | 1.067 | 1.278 | 3.316 | 5.843 |

|      |           |                                                        |       |       |       |       |       |        |
|------|-----------|--------------------------------------------------------|-------|-------|-------|-------|-------|--------|
| 1120 | At2g38540 | LP1 (nonspecific lipid transfer protein 1)             | >0.05 | 0.024 | 1.088 | 1.124 | 1.682 | 2.240  |
| 1121 | At3g60650 | unknown protein                                        | 0.032 | 0.010 | 0.967 | 1.163 | 1.351 | 2.181  |
| 1122 | At4g30290 | ATXTH19 (XYLOGLUCAN ENDOTRANSGLUCOSYLASE/HY            | >0.05 | 0.046 | 0.799 | 1.057 | 2.174 | 3.846  |
| 1123 | At5g12940 | leucine-rich repeat family protein                     | 0.019 | 0.027 | 0.797 | 0.869 | 2.104 | 1.955  |
| 1124 | At1g26945 | transcription regulator                                | 0.035 | 0.028 | 0.795 | 0.863 | 4.281 | 4.043  |
| 1125 | At1g52400 | BGL1 (BETA-GLUCOSIDASE HOMOLOG 1); hydrolase, h        | 0.013 | 0.003 | 0.754 | 1.150 | 7.569 | 10.173 |
| 1126 | At1g67750 | pectate lyase family protein                           | 0.015 | 0.004 | 0.885 | 1.008 | 2.437 | 2.529  |
| 1127 | At4g32460 | similar to unknown protein [Arabidopsis thaliana] (TAI | 0.020 | >0.05 | 0.899 | 0.764 | 2.311 | 2.620  |
| 1128 | At4g36110 | auxin-responsive protein, putative                     | 0.012 | 0.017 | 0.766 | 0.744 | 2.208 | 3.195  |
| 1129 | At5g49170 | similar to unknown protein [Arabidopsis thaliana] (TAI | 0.035 | 0.043 | 0.995 | 0.784 | 1.636 | 2.938  |
| 1130 | At3g14210 | ESM1 (EPITHIOSPECIFIER MODIFIER 1); carboxylestera     | 0.018 | 0.024 | 1.040 | 0.675 | 1.866 | 2.937  |
| 1131 | At2g41280 | M10                                                    | 0.026 | 0.008 | 1.193 | 0.857 | 1.870 | 2.926  |
| 1132 | At4g24120 | YSL1 (YELLOW STRIPE LIKE 1); oligopeptide transporter  | 0.031 | 0.014 | 1.041 | 0.834 | 2.096 | 2.714  |
| 1133 | At5g15230 | GASA4 (GAST1 PROTEIN HOMOLOG 4)                        | 0.011 | 0.004 | 1.031 | 0.954 | 1.198 | 2.011  |
| 1134 | At5g47230 | ERF5 (ETHYLENE RESPONSIVE ELEMENT BINDING FACT         | 0.012 | 0.003 | 1.317 | 0.884 | 1.219 | 2.033  |
| 1135 | At2g39980 | transferase family protein                             | 0.033 | >0.05 | 1.151 | 0.809 | 1.121 | 2.104  |
| 1136 | At1g19610 | LCR78/PDF1.4 (Low-molecular-weight cysteine-rich 78)   | 0.021 | 0.035 | 0.992 | 1.144 | 0.944 | 2.118  |
| 1137 | At5g07990 | TT7 (TRANSPARENT TESTA 7); flavonoid 3'-monooxyge      | 0.008 | >0.05 | 2.108 | 2.121 | 0.436 | 0.969  |
| 1138 | At5g61950 | ubiquitin carboxyl-terminal hydrolase-related          | 0.012 | 0.030 | 2.245 | 1.729 | 0.534 | 1.300  |
| 1139 | At4g08555 | unknown protein                                        | 0.019 | 0.038 | 2.401 | 1.932 | 0.573 | 1.244  |
| 1140 | At1g09500 | cinnamyl-alcohol dehydrogenase family / CAD family     | 0.020 | >0.05 | 2.108 | 2.123 | 0.493 | 1.673  |
| 1141 | At4g19515 | disease resistance family protein                      | 0.018 | >0.05 | 1.634 | 2.086 | 0.583 | 1.256  |
| 1142 | At1g05680 | UDP-glucuronosyl/UDP-glucosyl transferase family pro   | 0.019 | 0.017 | 2.086 | 1.864 | 0.535 | 2.486  |
| 1143 | At2g36750 | UGT72C1 (UDP-GLUCOSYL TRANSFERASE 72C1); UDP-g         | 0.046 | 0.034 | 2.770 | 1.936 | 0.576 | 2.707  |
| 1144 | At2g36780 | UDP-glucuronosyl/UDP-glucosyl transferase family pro   | >0.05 | 0.019 | 3.536 | 1.824 | 0.765 | 2.516  |
| 1145 | At2g36800 | DOG1 (DON-GLUCOSYLTRANSFERASE); UDP-glycosyltr         | 0.026 | 0.006 | 2.438 | 1.782 | 0.738 | 2.204  |
| 1146 | At3g28730 | ATHMG (HIGH MOBILITY GROUP); transcription factor      | 0.022 | 0.041 | 3.235 | 1.761 | 0.433 | 1.794  |
| 1147 | At4g31870 | ATGPX7 (GLUTATHIONE PEROXIDASE 7); glutathione pe      | 0.037 | >0.05 | 2.038 | 1.242 | 0.683 | 1.478  |
| 1148 | At3g28740 | cytochrome P450 family protein                         | 0.016 | >0.05 | 2.324 | 1.196 | 0.495 | 1.808  |
| 1149 | At5g09470 | mitochondrial substrate carrier family protein         | >0.05 | 0.049 | 2.823 | 2.054 | 1.220 | 1.283  |
| 1150 | At1g75290 | isoflavone reductase, putative                         | 0.045 | 0.004 | 2.310 | 2.164 | 1.048 | 1.331  |
| 1151 | At3g55910 | unknown protein                                        | >0.05 | 0.040 | 2.221 | 2.076 | 0.971 | 1.275  |
| 1152 | At3g56260 | unknown protein                                        | >0.05 | 0.039 | 2.043 | 1.969 | 0.970 | 1.292  |
| 1153 | At5g16970 | AT-AER (ALKENAL REDUCTASE); 2-alkenal reductase        | >0.05 | 0.008 | 2.670 | 1.951 | 0.895 | 1.718  |
| 1154 | At3g49570 | similar to unknown protein [Arabidopsis thaliana] (TAI | 0.047 | 0.007 | 2.169 | 1.649 | 0.903 | 1.562  |
| 1155 | At5g17000 | NADP-dependent oxidoreductase, putative                | 0.035 | 0.005 | 2.293 | 1.909 | 0.869 | 1.668  |
| 1156 | At2g37770 | aldo/keto reductase family protein                     | >0.05 | 0.004 | 4.624 | 3.061 | 1.058 | 2.885  |
| 1157 | At3g04000 | short-chain dehydrogenase/reductase (SDR) family pro   | >0.05 | 0.004 | 2.245 | 2.064 | 1.055 | 1.760  |
| 1158 | At3g14620 | CYP72A8 (cytochrome P450, family 72, subfamily A, po   | >0.05 | 0.008 | 3.434 | 2.828 | 1.073 | 2.213  |
| 1159 | At3g17790 | ATACP5 (acid phosphatase 5); acid phosphatase/ prote   | >0.05 | 0.005 | 2.570 | 2.136 | 1.166 | 1.710  |
| 1160 | At5g43450 | 2-oxoglutarate-dependent dioxygenase, putative         | 0.025 | 0.004 | 2.194 | 2.795 | 0.801 | 1.843  |
| 1161 | At3g02480 | ABA-responsive protein-related                         | >0.05 | 0.004 | 2.284 | 2.637 | 0.951 | 1.981  |
| 1162 | At5g13370 | auxin-responsive GH3 family protein                    | 0.030 | 0.007 | 1.867 | 2.387 | 0.878 | 1.261  |
| 1163 | At5g20150 | SPX (SYG1/Pho81/XPR1) domain-containing protein        | 0.013 | 0.008 | 1.995 | 2.406 | 0.712 | 1.147  |
| 1164 | At3g09390 | MT2A (METALLOTHIONEIN 2A)                              | 0.019 | 0.010 | 2.221 | 2.025 | 0.766 | 1.145  |
| 1165 | At5g16980 | NADP-dependent oxidoreductase, putative                | >0.05 | 0.036 | 2.422 | 1.757 | 0.750 | 1.472  |
| 1166 | At5g58570 | unknown protein                                        | 0.021 | 0.013 | 2.040 | 1.736 | 0.710 | 1.397  |
| 1167 | At5g24660 | similar to unknown protein [Arabidopsis thaliana] (TAI | >0.05 | 0.021 | 2.694 | 2.327 | 0.769 | 1.543  |
| 1168 | At2g44130 | kelch repeat-containing F-box family protein           | 0.020 | 0.022 | 2.718 | 1.371 | 0.779 | 1.102  |



|      |           |                                                           |       |       |        |       |        |       |
|------|-----------|-----------------------------------------------------------|-------|-------|--------|-------|--------|-------|
| 1169 | At4g26280 | sulfotransferase family protein                           | >0.05 | 0.034 | 30.387 | 5.621 | 0.789  | 0.906 |
| 1170 | At4g35640 | ATSERAT3;2 (SERINE ACETYLTRANSFERASE 3;2); acetyl         | >0.05 | 0.034 | 2.300  | 1.837 | 1.099  | 0.963 |
| 1171 | At5g42900 | similar to unknown protein [Arabidopsis thaliana] (TAI    | 0.000 | >0.05 | 2.796  | 2.023 | 0.907  | 0.388 |
| 1172 | At2g40080 | ELF4 (EARLY FLOWERING 4)                                  | 0.047 | >0.05 | 1.569  | 2.222 | 0.657  | 0.731 |
| 1173 | At5g43570 | serine-type endopeptidase inhibitor                       | 0.026 | >0.05 | 1.350  | 2.604 | 1.436  | 0.610 |
| 1174 | At2g40340 | AP2 domain-containing transcription factor, putative (I   | >0.05 | 0.025 | 1.662  | 2.386 | 1.371  | 0.800 |
| 1175 | At3g22231 | PCC1 (PATHOGEN AND CIRCADIAN CONTROLLED 1)                | >0.05 | 0.025 | 2.858  | 3.490 | 1.849  | 0.720 |
| 1176 | At1g68450 | VQ motif-containing protein                               | 0.015 | 0.009 | 0.953  | 2.698 | 1.456  | 0.922 |
| 1177 | At2g02120 | LCR70/PDF2.1 (Low-molecular-weight cysteine-rich 70)      | 0.036 | >0.05 | 0.859  | 2.223 | 1.423  | 0.814 |
| 1178 | At2g28700 | AGL46; DNA binding / transcription factor                 | 0.032 | 0.026 | 1.120  | 2.615 | 1.201  | 0.956 |
| 1179 | At3g04420 | ANAC048 (Arabidopsis NAC domain containing protein        | 0.020 | 0.040 | 1.030  | 2.374 | 1.146  | 0.847 |
| 1180 | At5g43580 | serine-type endopeptidase inhibitor                       | 0.035 | >0.05 | 0.829  | 2.371 | 1.110  | 0.581 |
| 1181 | At1g68500 | similar to hypothetical protein [Vitis vinifera] (GB:CAN€ | 0.021 | >0.05 | 1.253  | 2.303 | 0.911  | 0.705 |
| 1182 | At5g03545 | unknown protein                                           | 0.013 | >0.05 | 1.099  | 2.169 | 0.979  | 0.619 |
| 1183 | At1g52690 | late embryogenesis abundant protein, putative / LEA p     | 0.022 | >0.05 | 0.996  | 2.578 | 0.734  | 1.339 |
| 1184 | At1g02520 | PGP11 (P-GLYCOPROTEIN 11); ATPase, coupled to tran        | 0.049 | 0.041 | 1.066  | 2.324 | 0.984  | 1.299 |
| 1185 | At4g31240 | electron carrier                                          | 0.025 | 0.005 | 1.190  | 2.018 | 1.047  | 1.235 |
| 1186 | At4g11600 | ATGPX6 (GLUTATHIONE PEROXIDASE 6); glutathione pe         | 0.019 | 0.016 | 1.324  | 2.172 | 0.850  | 1.100 |
| 1187 | At5g05960 | protease inhibitor/seed storage/lipid transfer protein (  | 0.032 | 0.034 | 0.757  | 2.150 | 3.435  | 0.927 |
| 1188 | At5g22545 | similar to unknown protein [Arabidopsis thaliana] (TAI    | 0.038 | 0.042 | 0.755  | 2.200 | 2.854  | 0.981 |
| 1189 | At5g16360 | NC domain-containing protein                              | 0.017 | 0.023 | 0.742  | 1.811 | 2.135  | 0.961 |
| 1190 | At4g14390 | ankyrin repeat family protein                             | 0.045 | >0.05 | 0.716  | 1.645 | 2.147  | 0.971 |
| 1191 | At1g64160 | disease resistance-responsive family protein / dirigent   | 0.026 | >0.05 | 0.727  | 2.373 | 3.975  | 0.731 |
| 1192 | At5g01870 | lipid transfer protein, putative                          | 0.021 | >0.05 | 0.671  | 1.800 | 3.240  | 0.740 |
| 1193 | At2g19970 | pathogenesis-related protein, putative                    | 0.028 | >0.05 | 0.446  | 1.699 | 2.732  | 0.882 |
| 1194 | At5g15120 | similar to unknown protein [Arabidopsis thaliana] (TAI    | 0.017 | >0.05 | 0.733  | 1.039 | 2.072  | 0.848 |
| 1195 | At3g02550 | LBD41 (LOB DOMAIN-CONTAINING PROTEIN 41)                  | 0.012 | >0.05 | 0.735  | 1.004 | 2.028  | 0.774 |
| 1196 | At2g16385 | similar to unknown protein [Arabidopsis thaliana] (TAI    | 0.017 | >0.05 | 0.697  | 1.309 | 3.263  | 0.765 |
| 1197 | At5g39890 | similar to unknown protein [Arabidopsis thaliana] (TAI    | 0.013 | >0.05 | 0.916  | 0.944 | 2.680  | 0.677 |
| 1198 | At5g14650 | polygalacturonase, putative / pectinase, putative         | 0.018 | >0.05 | 0.526  | 1.621 | 2.305  | 0.511 |
| 1199 | At5g11420 | similar to unknown protein [Arabidopsis thaliana] (TAI    | 0.012 | 0.021 | 0.774  | 0.974 | 2.326  | 1.330 |
| 1200 | At5g44420 | PDF1.2 (Low-molecular-weight cysteine-rich 77)            | 0.017 | 0.012 | 0.472  | 0.991 | 12.577 | 5.452 |
| 1201 | At1g75830 | LCR67/PDF1.1 (Low-molecular-weight cysteine-rich 67)      | 0.018 | 0.010 | 0.533  | 0.913 | 14.635 | 5.030 |
| 1202 | At1g67760 | ATP binding / protein binding / unfolded protein bindir   | 0.023 | 0.027 | 0.744  | 1.034 | 2.714  | 1.681 |
| 1203 | At2g26020 | PDF1.2b (plant defensin 1.2b)                             | 0.012 | 0.010 | 0.564  | 0.908 | 11.183 | 3.060 |
| 1204 | At5g44430 | PDF1.2c (plant defensin 1.2c)                             | 0.018 | 0.008 | 0.696  | 0.912 | 15.505 | 4.179 |
| 1205 | At1g19380 | similar to unknown protein [Arabidopsis thaliana] (TAI    | >0.05 | 0.048 | 0.951  | 0.959 | 2.426  | 1.632 |
| 1206 | At5g24420 | glucosamine/galactosamine-6-phosphate isomerase-re        | 0.039 | >0.05 | 0.894  | 0.815 | 2.159  | 1.308 |
| 1207 | At2g15530 | zinc finger (C3HC4-type RING finger) family protein       | 0.024 | >0.05 | 0.839  | 0.737 | 2.758  | 1.337 |
| 1208 | At2g18010 | auxin-responsive family protein                           | 0.010 | 0.038 | 0.817  | 0.745 | 2.704  | 1.416 |
| 1209 | At2g17160 | protein kinase-related                                    | 0.022 | >0.05 | 0.892  | 0.812 | 2.553  | 1.481 |
| 1210 | At4g27310 | zinc finger (B-box type) family protein                   | 0.020 | 0.030 | 0.935  | 0.843 | 2.469  | 1.420 |
| 1211 | At2g26010 | PDF1.3 (plant defensin 1.3)                               | 0.013 | 0.013 | 0.735  | 0.771 | 8.512  | 2.350 |
| 1212 | At2g17530 | protein kinase family protein                             | 0.016 | 0.045 | 0.843  | 0.819 | 2.078  | 1.473 |
| 1213 | At2g15340 | glycine-rich protein                                      | 0.009 | >0.05 | 0.750  | 0.834 | 2.953  | 1.116 |
| 1214 | At2g18210 | similar to unknown protein [Arabidopsis thaliana] (TAI    | 0.032 | >0.05 | 0.758  | 0.811 | 2.907  | 1.178 |
| 1215 | At2g15390 | FUT4 (fucosyltransferase 4); fucosyltransferase/ transfr  | 0.001 | >0.05 | 0.792  | 0.771 | 3.185  | 1.227 |
| 1216 | At2g18140 | peroxidase, putative                                      | 0.021 | >0.05 | 0.810  | 0.736 | 3.374  | 1.320 |
| 1217 | At2g15420 | myosin heavy chain-related                                | 0.026 | >0.05 | 0.838  | 0.721 | 3.384  | 1.221 |

|      |           |                                                         |       |       |       |       |       |       |
|------|-----------|---------------------------------------------------------|-------|-------|-------|-------|-------|-------|
| 1218 | At2g18220 | Identical to Nucleolar complex protein 2 homolog [Ara   | 0.021 | >0.05 | 0.827 | 0.734 | 3.513 | 1.162 |
| 1219 | At2g15430 | RBP36A (RNA polymerase II 36 kDa polypeptide A); DN     | 0.026 | >0.05 | 0.931 | 0.853 | 2.140 | 1.097 |
| 1220 | At2g16300 | F-box family protein                                    | 0.011 | 0.028 | 0.920 | 0.815 | 2.823 | 1.154 |
| 1221 | At2g16060 | AHB1 (ARABIDOPSIS HEMOGLOBIN 1)                         | 0.017 | >0.05 | 0.916 | 0.905 | 2.069 | 1.067 |
| 1222 | At2g18150 | peroxidase, putative                                    | 0.030 | >0.05 | 0.835 | 0.874 | 3.497 | 1.307 |
| 1223 | At1g29920 | CAB2 (Chlorophyll a/b-binding protein 2); chlorophyll b | 0.011 | >0.05 | 0.712 | 0.775 | 2.204 | 1.203 |
| 1224 | At3g26200 | CYP71B22 (cytochrome P450, family 71, subfamily B, p    | 0.034 | >0.05 | 0.717 | 0.747 | 2.265 | 1.403 |
| 1225 | At4g37770 | ACS8 (1-Amino-cyclopropane-1-carboxylate synthase 8     | 0.020 | >0.05 | 0.507 | 0.574 | 5.306 | 2.458 |
| 1226 | At1g29660 | GDSL-motif lipase/hydrolase family protein              | 0.011 | >0.05 | 0.965 | 0.726 | 2.009 | 1.069 |
| 1227 | At5g26150 | protein kinase family protein                           | 0.031 | >0.05 | 0.913 | 0.699 | 2.242 | 1.009 |
| 1228 | At5g04120 | phosphoglycerate/bisphosphoglycerate mutase family      | 0.029 | >0.05 | 0.842 | 0.622 | 2.923 | 1.118 |
| 1229 | At3g59060 | PIL6 (PHYTOCHROME-INTERACTING FACTOR 5); DNA b          | 0.017 | >0.05 | 0.944 | 0.757 | 2.178 | 1.078 |
| 1230 | At2g18200 | similar to unknown protein [Arabidopsis thaliana] (TAIR | 0.024 | >0.05 | 0.845 | 0.740 | 2.276 | 1.140 |
| 1231 | At2g14580 | ATPRB1 (Arabidopsis thaliana basic pathogenesis-relate  | 0.043 | >0.05 | 0.844 | 0.818 | 2.001 | 0.983 |
| 1232 | At2g16575 | similar to unknown protein [Arabidopsis thaliana] (TAIR | 0.015 | >0.05 | 0.756 | 0.727 | 3.024 | 0.964 |
| 1233 | At2g15500 | similar to PAB2 (POLY(A) BINDING PROTEIN 2), RNA bir    | 0.013 | >0.05 | 0.708 | 0.727 | 3.427 | 0.970 |
| 1234 | At2g17525 | pentatricopeptide (PPR) repeat-containing protein       | 0.010 | >0.05 | 0.744 | 0.741 | 3.342 | 0.989 |
| 1235 | At2g16580 | auxin-responsive protein, putative                      | 0.030 | >0.05 | 0.751 | 0.758 | 2.608 | 0.947 |
| 1236 | At2g15400 | RBP36B (RNA polymerase II 36 kDa polypeptide B); DN.    | 0.013 | >0.05 | 0.689 | 0.670 | 3.661 | 1.016 |
| 1237 | At2g17150 | RWP-RK domain-containing protein                        | 0.020 | >0.05 | 0.768 | 0.755 | 2.503 | 1.034 |
| 1238 | At2g15520 | transposable element gene                               | 0.010 | >0.05 | 0.731 | 0.726 | 3.386 | 1.040 |
| 1239 | At2g15550 | transposable element gene                               | 0.014 | >0.05 | 0.764 | 0.737 | 3.096 | 1.037 |
| 1240 | At2g15535 | LCR10 (Low-molecular-weight cysteine-rich 10)           | 0.017 | >0.05 | 0.722 | 0.703 | 3.807 | 1.077 |
| 1241 | At2g17480 | MLO8 (MILDEW RESISTANCE LOCUS O 8); calmodulin b        | 0.030 | >0.05 | 0.732 | 0.780 | 2.569 | 1.083 |
| 1242 | At2g16450 | F-box family protein                                    | 0.018 | >0.05 | 0.746 | 0.693 | 3.538 | 0.894 |
| 1243 | At2g17310 | SON1 (SUPPRESSOR OF NIM1-1 1)                           | 0.020 | >0.05 | 0.795 | 0.737 | 2.728 | 0.937 |
| 1244 | At2g16587 | expressed protein                                       | 0.013 | >0.05 | 0.754 | 0.743 | 3.269 | 0.899 |
| 1245 | At2g18080 | EDA2 (embryo sac development arrest 2); serine-type p   | 0.013 | >0.05 | 0.796 | 0.740 | 3.226 | 0.894 |
| 1246 | At2g15327 | unknown protein                                         | 0.020 | >0.05 | 0.839 | 0.851 | 2.452 | 0.961 |
| 1247 | At2g17210 | pentatricopeptide (PPR) repeat-containing protein       | 0.016 | >0.05 | 0.838 | 0.761 | 3.257 | 0.927 |
| 1248 | At4g09400 | transposable element gene                               | 0.015 | >0.05 | 0.856 | 0.763 | 3.372 | 0.971 |
| 1249 | At3g13140 | hydroxyproline-rich glycoprotein family protein         | 0.010 | >0.05 | 0.928 | 0.862 | 2.234 | 0.893 |
| 1250 | At5g04310 | pectate lyase family protein                            | 0.031 | >0.05 | 0.885 | 0.866 | 2.105 | 0.915 |
| 1251 | At2g17270 | mitochondrial substrate carrier family protein          | 0.032 | >0.05 | 0.763 | 0.853 | 2.212 | 0.888 |
| 1252 | At2g18270 | unknown protein                                         | 0.033 | >0.05 | 0.754 | 0.724 | 3.257 | 0.789 |
| 1253 | At2g17510 | EMB2763 (EMBRYO DEFECTIVE 2763); RNA binding / ri       | 0.009 | >0.05 | 0.713 | 0.725 | 2.459 | 0.825 |
| 1254 | At2g15345 | enzyme inhibitor/ pectinesterase                        | 0.044 | >0.05 | 0.772 | 0.732 | 2.106 | 1.005 |
| 1255 | At2g16440 | DNA replication licensing factor, putative              | 0.012 | >0.05 | 0.746 | 0.689 | 2.436 | 0.986 |
| 1256 | At2g16530 | 3-oxo-5-alpha-steroid 4-dehydrogenase family protein    | 0.048 | >0.05 | 0.743 | 0.771 | 2.317 | 0.755 |
| 1257 | At2g17470 | similar to unknown protein [Arabidopsis thaliana] (TAIR | 0.040 | >0.05 | 0.719 | 0.692 | 2.882 | 0.631 |
| 1258 | At4g10270 | wound-responsive family protein                         | 0.011 | >0.05 | 0.684 | 0.884 | 2.022 | 0.829 |
| 1259 | At1g78460 | SOUL heme-binding family protein                        | 0.031 | >0.05 | 1.143 | 0.918 | 2.131 | 0.966 |
| 1260 | At5g19110 | extracellular dermal glycoprotein-related / EDGP-relate | 0.030 | >0.05 | 0.483 | 0.484 | 3.354 | 2.285 |
| 1261 | At3g12610 | DRT100 (DNA-DAMAGE REPAIR/TOLERATION 100); pro          | 0.007 | >0.05 | 0.634 | 0.473 | 2.088 | 2.096 |
| 1262 | At4g33220 | pectinesterase family protein                           | 0.010 | >0.05 | 0.893 | 0.520 | 2.312 | 1.390 |
| 1263 | At4g33720 | pathogenesis-related protein, putative                  | 0.042 | >0.05 | 0.675 | 0.486 | 3.712 | 1.355 |
| 1264 | At2g24850 | TAT3 (TYROSINE AMINOTRANSFERASE 3); transaminasi        | 0.018 | 0.036 | 1.355 | 0.328 | 6.414 | 3.198 |
| 1265 | At5g02760 | protein phosphatase 2C family protein / PP2C family pr  | 0.008 | 0.012 | 1.060 | 0.670 | 2.097 | 1.581 |
| 1266 | At3g12710 | methyladenine glycosylase family protein                | 0.019 | >0.05 | 0.909 | 0.644 | 2.442 | 1.892 |

|      |           |                                                       |       |       |       |       |       |       |
|------|-----------|-------------------------------------------------------|-------|-------|-------|-------|-------|-------|
| 1267 | At1g20190 | ATEXPA11 (ARABIDOPSIS THALIANA EXPANSIN A11)          | 0.018 | 0.037 | 0.928 | 0.602 | 2.610 | 2.636 |
| 1268 | At3g49110 | ATPCA/ATPRX33/PRX33/PRXCA (PEROXIDASE 33); perc       | 0.018 | 0.024 | 1.148 | 0.654 | 1.898 | 2.115 |
| 1269 | At5g36270 | similar to DHAR2, glutathione dehydrogenase (ascorba  | 0.020 | >0.05 | 0.404 | 0.699 | 1.864 | 1.216 |
| 1270 | At3g56220 | transcription regulator                               | 0.035 | >0.05 | 0.487 | 0.743 | 1.451 | 1.321 |
| 1271 | At3g09940 | ATMDAR3/MDHAR (MONODEHYDROASCORBATE REDU              | 0.024 | >0.05 | 0.377 | 0.530 | 1.780 | 1.119 |
| 1272 | At1g16400 | CYP79F2 (cytochrome P450, family 79, subfamily F, pol | 0.019 | >0.05 | 0.416 | 0.862 | 1.973 | 1.690 |
| 1273 | At3g19710 | BCAT4 (BRANCHED-CHAIN AMINOTRANSFERASE4); cat         | 0.021 | >0.05 | 0.278 | 0.868 | 1.722 | 1.972 |
| 1274 | At3g56390 | unknown protein                                       | 0.032 | >0.05 | 0.494 | 1.109 | 1.792 | 1.033 |
| 1275 | At1g62560 | flavin-containing monooxygenase family protein / FMC  | 0.035 | >0.05 | 0.571 | 0.824 | 1.259 | 2.389 |
| 1276 | At1g65860 | flavin-containing monooxygenase family protein / FMC  | 0.022 | >0.05 | 0.460 | 0.557 | 1.323 | 2.715 |
| 1277 | At3g57240 | BG3 (BETA-1,3-GLUCANASE 3); hydrolase, hydrolyzing c  | >0.05 | 0.046 | 2.033 | 1.493 | 4.340 | 1.192 |
| 1278 | At5g06510 | CCAAT-binding transcription factor (CBF-B/NF-YA) fami | 0.031 | 0.001 | 1.279 | 3.535 | 4.020 | 2.439 |
| 1279 | At4g17030 | AEXLB1 (ARABIDOPSIS THALIANA EXPANSIN-LIKE B1)        | >0.05 | 0.002 | 1.107 | 2.527 | 3.032 | 1.920 |
| 1280 | At3g05690 | ATHAP2B/HAP2B/UNE8 (HEME ACTIVATOR PROTEIN (H         | >0.05 | 0.007 | 1.237 | 2.553 | 3.586 | 2.056 |
| 1281 | At5g52720 | metal ion binding                                     | >0.05 | 0.006 | 1.092 | 3.883 | 4.309 | 2.082 |
