# Supplementary material for: Alkamides Activate Jasmonic Acid Biosynthesis and Signaling Pathways and Confer Resistance to Botrytis cinerea in Arabidopsis thaliana
Source: PubMed Central journal article supplement (PMC3208606; doi:10.1371/journal.pone.0027251), 2011-11-04
Supplement: pone.0027251.s006.pdf [file pone.0027251.s006.pdf]

|             |                                                     |     |      |                                                                                                                                                                                                                                                                                                                                                                                                                                                                                                                                                                                                                                                                                                                                                                                                                                                                                                                                                                                                                                                                                                                                                                                                                                                                                                                                           |      |          |
|-------------|-----------------------------------------------------|-----|------|-------------------------------------------------------------------------------------------------------------------------------------------------------------------------------------------------------------------------------------------------------------------------------------------------------------------------------------------------------------------------------------------------------------------------------------------------------------------------------------------------------------------------------------------------------------------------------------------------------------------------------------------------------------------------------------------------------------------------------------------------------------------------------------------------------------------------------------------------------------------------------------------------------------------------------------------------------------------------------------------------------------------------------------------------------------------------------------------------------------------------------------------------------------------------------------------------------------------------------------------------------------------------------------------------------------------------------------------|------|----------|
| 01.02.02    | nitrogen metabolism                                 | 8   | 0.62 | AT2G24850 AT3G44300 AT3G44310 AT4G16310 AT4G23600 AT4G29740 AT5G35630 AT5G37600                                                                                                                                                                                                                                                                                                                                                                                                                                                                                                                                                                                                                                                                                                                                                                                                                                                                                                                                                                                                                                                                                                                                                                                                                                                           | 86   | 3.93E-02 |
| 01.02.02.06 | assimilation of ammonia                             | 1   | 0.07 | AT5G35630                                                                                                                                                                                                                                                                                                                                                                                                                                                                                                                                                                                                                                                                                                                                                                                                                                                                                                                                                                                                                                                                                                                                                                                                                                                                                                                                 | 1    | 4.49E-02 |
| 01.02.03    | sulfur metabolism                                   | 7   | 0.54 | AT1G13420 AT2G03760 AT3G45070 AT3G60180 AT4G26280 AT4G35640 AT5G09290                                                                                                                                                                                                                                                                                                                                                                                                                                                                                                                                                                                                                                                                                                                                                                                                                                                                                                                                                                                                                                                                                                                                                                                                                                                                     | 72   | 4.25E-02 |
| 01.02.03.04 | conjunction of sulfate                              | 4   | 0.31 | AT1G13420 AT2G03760 AT3G45070 AT4G26280                                                                                                                                                                                                                                                                                                                                                                                                                                                                                                                                                                                                                                                                                                                                                                                                                                                                                                                                                                                                                                                                                                                                                                                                                                                                                                   | 22   | 1.55E-02 |
| 01.05       | C-compound and carbohydrate metabolism              | 129 | 10.1 | AT1G02640 AT1G02850 AT1G05650 AT1G05680 AT1G09500 AT1G15380 AT1G21100 AT1G23730 AT1G23870 AT1G29660 AT1G33030 AT1G35910 AT1G51420 AT1G51470 AT1G52400 AT1G52700 AT1G54000 AT1G54020 AT1G56600 AT1G58370 AT1G60140 AT1G60470 AT1G63180 AT1G65310 AT1G66700 AT1G77120 AT1G77530 AT2G01880 AT2G02010 AT2G15390 AT2G18360 AT2G18560 AT2G18700 AT2G18800 AT2G19800 AT2G22190 AT2G22590 AT2G29350 AT2G32290 AT2G36750 AT2G36780 AT2G36790 AT2G36800 AT2G36970 AT2G38600 AT2G39030 AT2G43570 AT2G43580 AT2G43590 AT2G43880 AT2G44460 AT2G47180 AT3G01500 AT3G12500 AT3G13750 AT3G14210 AT3G17790 AT3G18000 AT3G18080 AT3G19620 AT3G23510 AT3G23530 AT3G23730 AT3G26610 AT3G44860 AT3G44870 AT3G47540 AT3G48580 AT3G50760 AT3G52340 AT3G52780 AT3G53150 AT3G53160 AT3G55630 AT3G56000 AT3G57240 AT3G57260 AT3G57520 AT3G59480 AT3G60140 AT3G61990 AT4G02280 AT4G08160 AT4G09020 AT4G12830 AT4G15210 AT4G15290 AT4G15480 AT4G15490 AT4G16310 AT4G18340 AT4G19810 AT4G20460 AT4G23990 AT4G24380 AT4G25820 AT4G25900 AT4G26260 AT4G26270 AT4G26530 AT4G29740 AT4G30140 AT4G30290 AT4G37770 AT4G37990 AT5G05900 AT5G14470 AT5G14650 AT5G14740 AT5G19040 AT5G20250 AT5G24410 AT5G24420 AT5G24770 AT5G28510 AT5G38420 AT5G39320 AT5G41080 AT5G42800 AT5G44020 AT5G49360 AT5G53990 AT5G54060 AT5G55480 AT5G56630 AT5G56870 AT5G59520 AT5G65730 AT5G66120 | 1646 | 4.18E-10 |
| 01.05.02    | sugar, glucoside, polyol and carboxylate metabolism | 67  | 5.25 | AT1G02640 AT1G02850 AT1G05680 AT1G23870 AT1G35910 AT1G51420 AT1G51470 AT1G52400 AT1G56600 AT1G58370 AT1G60140 AT1G60470 AT1G63180 AT2G15390 AT2G18560 AT2G18700 AT2G19800 AT2G22190 AT2G22590 AT2G36750 AT2G36780 AT2G36790 AT2G36800 AT2G36970 AT2G44460 AT2G47180 AT3G13750 AT3G18080 AT3G19620 AT3G50760 AT3G52340 AT3G53150 AT3G53160 AT3G56000 AT3G57240 AT3G57260 AT3G57520 AT3G59480 AT3G60140 AT4G02280 AT4G08160 AT4G15290 AT4G15480 AT4G15490 AT4G18340 AT4G19810 AT4G20460 AT4G23990 AT4G25900 AT4G26260 AT4G26270 AT4G26530 AT4G37990 AT5G05900 AT5G14470 AT5G20250 AT5G24410 AT5G24420 AT5G28510 AT5G38420 AT5G39320 AT5G49360 AT5G53990 AT5G54060 AT5G55480 AT5G56630 AT5G56870 AT5G59520                                                                                                                                                                                                                                                                                                                                                                                                                                                                                                                                                                                                                                   | 853  | 7.18E-06 |
| 01.05.02.01 | nucleotide-sugar metabolism                         | 16  | 1.25 | AT1G05680 AT1G63180 AT2G18560 AT2G36750 AT2G36780 AT2G36790 AT2G36800 AT2G36970 AT3G53150 AT3G53160 AT4G02280 AT4G15480 AT4G15490 AT4G20460 AT5G05900 AT5G39320                                                                                                                                                                                                                                                                                                                                                                                                                                                                                                                                                                                                                                                                                                                                                                                                                                                                                                                                                                                                                                                                                                                                                                           | 185  | 9.47E-03 |
| 01.05.02.04 | sugar, glucoside, polyol and carboxylate anabolism  | 9   | 0.7  | AT1G23870 AT1G35910 AT1G51420 AT1G60140 AT2G18700 AT2G22190 AT3G52340 AT3G59480 AT4G02280                                                                                                                                                                                                                                                                                                                                                                                                                                                                                                                                                                                                                                                                                                                                                                                                                                                                                                                                                                                                                                                                                                                                                                                                                                                 | 60   | 1.35E-03 |

|                |                                                                                    |    |      |                                                                                                                                                                                                                                                                                                                                                                                                                                                                                                                                                                                                                                                                                               |     |          |
|----------------|------------------------------------------------------------------------------------|----|------|-----------------------------------------------------------------------------------------------------------------------------------------------------------------------------------------------------------------------------------------------------------------------------------------------------------------------------------------------------------------------------------------------------------------------------------------------------------------------------------------------------------------------------------------------------------------------------------------------------------------------------------------------------------------------------------------------|-----|----------|
| 01.05.03       | polysaccharide metabolism                                                          | 17 | 1.33 | AT1G05650 AT2G32290 AT2G43570 AT2G43580 AT2G43590 AT2G43880 AT3G12500 AT3G26610 AT3G47540 AT3G56000 AT3G57240 AT3G57260 AT4G09020 AT4G15210 AT4G15290 AT4G23990 AT5G14650                                                                                                                                                                                                                                                                                                                                                                                                                                                                                                                     | 238 | 4.08E-02 |
| 01.05.03.03    | chitin metabolism                                                                  | 5  | 0.39 | AT2G43570 AT2G43580 AT2G43590 AT3G12500 AT3G47540                                                                                                                                                                                                                                                                                                                                                                                                                                                                                                                                                                                                                                             | 14  | 2.58E-04 |
| 01.05.03.03.07 | chitin catabolism                                                                  | 5  | 0.39 | AT2G43570 AT2G43580 AT2G43590 AT3G12500 AT3G47540                                                                                                                                                                                                                                                                                                                                                                                                                                                                                                                                                                                                                                             | 14  | 2.58E-04 |
| 01.05.03.04.07 | starch catabolism                                                                  | 3  | 0.23 | AT2G32290 AT4G09020 AT4G15210                                                                                                                                                                                                                                                                                                                                                                                                                                                                                                                                                                                                                                                                 | 17  | 3.84E-02 |
| 01.06          | lipid, fatty acid and isoprenoid metabolism                                        | 36 | 2.82 | AT1G02660 AT1G06120 AT1G06350 AT1G17420 AT1G29660 AT1G54000 AT1G54020 AT1G74010 AT1G80380 AT2G16530 AT2G19060 AT2G26560 AT3G03530 AT3G14440 AT3G18000 AT3G23510 AT3G23530 AT3G25820 AT3G25830 AT3G45140 AT3G57020 AT4G15340 AT4G15440 AT4G25700 AT4G29800 AT4G30140 AT4G37760 AT5G09290 AT5G22020 AT5G41080 AT5G47980 AT5G48010 AT5G48880 AT5G55480 AT5G57240 AT5G58770                                                                                                                                                                                                                                                                                                                       | 827 | 1.00E+00 |
| 01.06.06       | isoprenoid metabolism                                                              | 10 | 0.78 | AT1G74010 AT3G14440 AT3G25820 AT3G25830 AT3G57020 AT4G15340 AT4G25700 AT5G22020 AT5G48010 AT5G58770                                                                                                                                                                                                                                                                                                                                                                                                                                                                                                                                                                                           | 177 | 2.74E-01 |
| 01.06.06.03    | monoterpenes metabolism                                                            | 2  | 0.15 | AT3G25820 AT3G25830                                                                                                                                                                                                                                                                                                                                                                                                                                                                                                                                                                                                                                                                           | 4   | 1.14E-02 |
| 01.20          | secondary metabolism                                                               | 67 | 5.25 | AT1G02920 AT1G02930 AT1G09500 AT1G12010 AT1G16400 AT1G16410 AT1G17020 AT1G17180 AT1G17190 AT1G17420 AT1G33030 AT1G35190 AT1G49860 AT1G53680 AT1G56650 AT1G59700 AT1G64160 AT1G65060 AT1G69920 AT1G69930 AT1G74010 AT1G74590 AT1G77530 AT1G78380 AT2G02930 AT2G02990 AT2G06050 AT2G22330 AT2G23910 AT2G29440 AT2G29460 AT2G29470 AT2G36800 AT3G03190 AT3G13610 AT3G13650 AT3G14210 AT3G19710 AT3G25760 AT3G25770 AT3G26830 AT3G44300 AT3G44310 AT3G45140 AT3G51240 AT3G55120 AT3G57020 AT3G62760 AT4G02520 AT4G08870 AT4G10500 AT4G11210 AT4G22880 AT4G29740 AT4G34710 AT4G36220 AT4G37770 AT5G05270 AT5G07990 AT5G08640 AT5G13930 AT5G17220 AT5G22020 AT5G42800 AT5G43450 AT5G63600 AT5G66120 | 426 | 3.01E-19 |
| 01.20.05       | metabolism of acetic acid derivatives                                              | 5  | 0.39 | AT1G17420 AT2G06050 AT3G25760 AT3G25770 AT3G45140                                                                                                                                                                                                                                                                                                                                                                                                                                                                                                                                                                                                                                             | 23  | 3.10E-03 |
| 01.20.17       | metabolism of secondary products derived from primary amino acids                  | 7  | 0.54 | AT1G16400 AT1G16410 AT1G35190 AT2G22330 AT3G19710 AT3G57020 AT5G22020                                                                                                                                                                                                                                                                                                                                                                                                                                                                                                                                                                                                                         | 46  | 4.18E-03 |
| 01.20.17.07    | metabolism of glycosinolates and derivatives                                       | 4  | 0.31 | AT1G16400 AT1G16410 AT2G22330 AT3G19710                                                                                                                                                                                                                                                                                                                                                                                                                                                                                                                                                                                                                                                       | 17  | 6.03E-03 |
| 01.20.17.09    | metabolism of alkaloids                                                            | 3  | 0.23 | AT1G35190 AT3G57020 AT5G22020                                                                                                                                                                                                                                                                                                                                                                                                                                                                                                                                                                                                                                                                 | 17  | 3.84E-02 |
| 01.20.31       | metabolism of secondary products derived from L-lysine, L-arginine and L-histidine | 2  | 0.15 | AT4G08870 AT4G34710                                                                                                                                                                                                                                                                                                                                                                                                                                                                                                                                                                                                                                                                           | 6   | 2.68E-02 |

|                |                                                                              |    |      |                                                                                                                                                                                                                                                                     |     |          |
|----------------|------------------------------------------------------------------------------|----|------|---------------------------------------------------------------------------------------------------------------------------------------------------------------------------------------------------------------------------------------------------------------------|-----|----------|
| 01.20.33       | metabolism of secondary products derived from L-tryptophan                   | 7  | 0.54 | AT1G74010 AT2G22330 AT3G26830 AT3G44300 AT3G44310 AT3G57020 AT5G22020                                                                                                                                                                                               | 38  | 1.35E-03 |
| 01.20.35       | metabolism of secondary products derived from L-phenylalanine and L-tyrosine | 21 | 1.64 | AT1G09500 AT1G17020 AT1G33030 AT1G56650 AT1G64160 AT1G65060 AT1G77530 AT2G02990 AT2G23910 AT3G13650 AT3G51240 AT3G55120 AT4G11210 AT4G22880 AT4G36220 AT5G05270 AT5G07990 AT5G08640 AT5G13930 AT5G42800 AT5G63600                                                   | 129 | 3.04E-07 |
| 01.20.35.01    | metabolism of phenylpropanoids                                               | 21 | 1.64 | AT1G09500 AT1G17020 AT1G33030 AT1G56650 AT1G64160 AT1G65060 AT1G77530 AT2G02990 AT2G23910 AT3G13650 AT3G51240 AT3G55120 AT4G11210 AT4G22880 AT4G36220 AT5G05270 AT5G07990 AT5G08640 AT5G13930 AT5G42800 AT5G63600                                                   | 117 | 5.41E-08 |
| 01.20.35.01.03 | metabolism of lignins                                                        | 8  | 0.62 | AT1G09500 AT1G33030 AT1G64160 AT1G77530 AT2G23910 AT3G13650 AT4G11210 AT4G36220                                                                                                                                                                                     | 46  | 9.22E-04 |
| 01.20.35.01.05 | metabolism of stilbenes, flavonoids                                          | 12 | 0.94 | AT1G17020 AT1G56650 AT2G02990 AT3G51240 AT3G55120 AT4G22880 AT5G05270 AT5G07990 AT5G08640 AT5G13930 AT5G42800 AT5G63600                                                                                                                                             | 46  | 6.02E-07 |
| 01.20.38       | metabolism of toxins/drugs                                                   | 19 | 1.48 | AT1G02920 AT1G02930 AT1G17180 AT1G17190 AT1G49860 AT1G53680 AT1G59700 AT1G69920 AT1G69930 AT1G74590 AT1G78380 AT2G02930 AT2G29440 AT2G29460 AT2G29470 AT3G03190 AT3G62760 AT4G02520 AT5G17220                                                                       | 48  | 7.25E-14 |
| <b>02</b>      | <b>ENERGY</b>                                                                | 26 | 2.03 | AT1G14150 AT1G19150 AT1G23870 AT1G29920 AT1G35910 AT1G51420 AT1G60140 AT1G77120 AT1G80380 AT2G22190 AT3G21720 AT3G22370 AT3G52340 AT3G59480 AT3G60180 AT4G09020 AT4G15210 AT4G26270 AT4G26530 AT4G28660 AT5G09470 AT5G24410 AT5G24420 AT5G48880 AT5G56630 AT5G65690 | 453 | 1.21E-01 |
| 02.01          | glycolysis and gluconeogenesis                                               | 7  | 0.54 | AT1G51420 AT1G80380 AT3G52340 AT4G26270 AT4G26530 AT5G56630 AT5G65690                                                                                                                                                                                               | 73  | 4.53E-02 |
| 02.19          | metabolism of energy reserves (e.g. glycogen, trehalose)                     | 6  | 0.47 | AT1G23870 AT1G35910 AT1G60140 AT2G22190 AT4G09020 AT4G15210                                                                                                                                                                                                         | 53  | 3.09E-02 |
| <b>04</b>      | <b>STORAGE PROTEIN</b>                                                       | 16 | 1.25 | AT1G72610 AT2G26560 AT3G05950 AT4G14630 AT5G20630 AT5G25610 AT5G38910 AT5G38930 AT5G38940 AT5G39110 AT5G39120 AT5G39130 AT5G39150 AT5G39160 AT5G39180 AT5G39190                                                                                                     | 65  | 2.02E-08 |
| 04.01          | storage facilitating proteins                                                | 16 | 1.25 | AT1G72610 AT2G26560 AT3G05950 AT4G14630 AT5G20630 AT5G25610 AT5G38910 AT5G38930 AT5G38940 AT5G39110 AT5G39120 AT5G39130 AT5G39150 AT5G39160 AT5G39180 AT5G39190                                                                                                     | 65  | 2.02E-08 |

|    |               |     |      |                                                                                                                                                                                                                                                                                                                                                                                                                                                                                                                                                                                                                                                                                                                                                                                                                                                                                                                                                                                                                                                                                                                                                                                    |      |          |
|----|---------------|-----|------|------------------------------------------------------------------------------------------------------------------------------------------------------------------------------------------------------------------------------------------------------------------------------------------------------------------------------------------------------------------------------------------------------------------------------------------------------------------------------------------------------------------------------------------------------------------------------------------------------------------------------------------------------------------------------------------------------------------------------------------------------------------------------------------------------------------------------------------------------------------------------------------------------------------------------------------------------------------------------------------------------------------------------------------------------------------------------------------------------------------------------------------------------------------------------------|------|----------|
| 11 | TRANSCRIPTION | 103 | 8.07 | <p>AT1G04240 AT1G13300 AT1G18330 AT1G19050 AT1G19210 AT1G19510 <br/> AT1G21910 AT1G26945 AT1G31050 AT1G43160 AT1G48000 AT1G52890 <br/> AT1G53170 AT1G56650 AT1G59940 AT1G60920 AT1G62975 AT1G66230 <br/> AT1G66380 AT1G66600 AT1G67710 AT1G72360 AT1G72830 AT1G74080 <br/> AT1G80840 AT2G15400 AT2G15430 AT2G17150 AT2G22630 AT2G28700 <br/> AT2G36270 AT2G37430 AT2G40340 AT2G40670 AT2G40750 AT2G43220 <br/> AT2G43500 AT2G44840 AT2G46400 AT2G46510 AT2G46680 AT2G47190 <br/> AT2G47520 AT3G01970 AT3G04070 AT3G04420 AT3G05690 AT3G11580 <br/> AT3G13760 AT3G15210 AT3G23240 AT3G23250 AT3G24310 AT3G24500 <br/> AT3G25790 AT3G28730 AT3G46080 AT3G48100 AT3G48360 AT3G48920 <br/> AT3G49760 AT3G51910 AT3G56980 AT3G59060 AT4G13130 AT4G13620 <br/> AT4G17460 AT4G23810 AT4G25470 AT4G25480 AT4G25490 AT4G27310 <br/> AT4G27410 AT4G29190 AT4G30180 AT4G34410 AT4G39070 AT5G02350 <br/> AT5G04150 AT5G06510 AT5G08790 AT5G10140 AT5G14750 AT5G15160 <br/> AT5G15830 AT5G17300 AT5G21960 AT5G22250 AT5G25810 AT5G28300 <br/> AT5G28770 AT5G37260 AT5G43650 AT5G47220 AT5G47230 AT5G50915 <br/> AT5G51790 AT5G51990 AT5G58010 AT5G62920 AT5G63160 AT5G64810 <br/> AT5G66700</p> | 2664 | 1.00E+00 |
|----|---------------|-----|------|------------------------------------------------------------------------------------------------------------------------------------------------------------------------------------------------------------------------------------------------------------------------------------------------------------------------------------------------------------------------------------------------------------------------------------------------------------------------------------------------------------------------------------------------------------------------------------------------------------------------------------------------------------------------------------------------------------------------------------------------------------------------------------------------------------------------------------------------------------------------------------------------------------------------------------------------------------------------------------------------------------------------------------------------------------------------------------------------------------------------------------------------------------------------------------|------|----------|

|       |               |     |      |                                                                                                                                                                                                                                                                                                                                                                                                                                                                                                                                                                                                                                                                                                                                                                                                                                                                                                                                                                                                                                                                                                                                                                    |      |          |
|-------|---------------|-----|------|--------------------------------------------------------------------------------------------------------------------------------------------------------------------------------------------------------------------------------------------------------------------------------------------------------------------------------------------------------------------------------------------------------------------------------------------------------------------------------------------------------------------------------------------------------------------------------------------------------------------------------------------------------------------------------------------------------------------------------------------------------------------------------------------------------------------------------------------------------------------------------------------------------------------------------------------------------------------------------------------------------------------------------------------------------------------------------------------------------------------------------------------------------------------|------|----------|
| 11.02 | RNA synthesis | 102 | 7.99 | <p>AT1G04240 AT1G13300 AT1G18330 AT1G19050 AT1G19210 AT1G19510 <br/> AT1G21910 AT1G26945 AT1G31050 AT1G43160 AT1G48000 AT1G52890 <br/> AT1G53170 AT1G56650 AT1G59940 AT1G60920 AT1G62975 AT1G66230 <br/> AT1G66380 AT1G66600 AT1G67710 AT1G72360 AT1G72830 AT1G74080 <br/> AT1G80840 AT2G15400 AT2G15430 AT2G17150 AT2G22630 AT2G28700 <br/> AT2G36270 AT2G37430 AT2G40340 AT2G40670 AT2G40750 AT2G43220 <br/> AT2G43500 AT2G44840 AT2G46400 AT2G46510 AT2G46680 AT2G47190 <br/> AT2G47520 AT3G01970 AT3G04070 AT3G04420 AT3G05690 AT3G11580 <br/> AT3G13760 AT3G15210 AT3G23240 AT3G23250 AT3G24310 AT3G24500 <br/> AT3G25790 AT3G28730 AT3G46080 AT3G48100 AT3G48360 AT3G48920 <br/> AT3G49760 AT3G51910 AT3G56980 AT3G59060 AT4G13130 AT4G13620 <br/> AT4G17460 AT4G23810 AT4G25470 AT4G25480 AT4G25490 AT4G27310 <br/> AT4G27410 AT4G29190 AT4G30180 AT4G34410 AT4G39070 AT5G02350 <br/> AT5G04150 AT5G06510 AT5G08790 AT5G10140 AT5G14750 AT5G15160 <br/> AT5G15830 AT5G17300 AT5G21960 AT5G25810 AT5G28300 AT5G28770 <br/> AT5G37260 AT5G43650 AT5G47220 AT5G47230 AT5G50915 AT5G51790 <br/> AT5G51990 AT5G58010 AT5G62920 AT5G63160 AT5G64810 AT5G66700</p> | 2298 | 1.00E+00 |
|-------|---------------|-----|------|--------------------------------------------------------------------------------------------------------------------------------------------------------------------------------------------------------------------------------------------------------------------------------------------------------------------------------------------------------------------------------------------------------------------------------------------------------------------------------------------------------------------------------------------------------------------------------------------------------------------------------------------------------------------------------------------------------------------------------------------------------------------------------------------------------------------------------------------------------------------------------------------------------------------------------------------------------------------------------------------------------------------------------------------------------------------------------------------------------------------------------------------------------------------|------|----------|

|                |                          |     |      |                                                                                                                                                                                                                                                                                                                                                                                                                                                                                                                                                                                                                                                                                                                                                                                                                                                                                                                                                                                                                                                                                                         |      |          |
|----------------|--------------------------|-----|------|---------------------------------------------------------------------------------------------------------------------------------------------------------------------------------------------------------------------------------------------------------------------------------------------------------------------------------------------------------------------------------------------------------------------------------------------------------------------------------------------------------------------------------------------------------------------------------------------------------------------------------------------------------------------------------------------------------------------------------------------------------------------------------------------------------------------------------------------------------------------------------------------------------------------------------------------------------------------------------------------------------------------------------------------------------------------------------------------------------|------|----------|
| 11.02.03       | mRNA synthesis           | 100 | 7.83 | AT1G04240 AT1G13300 AT1G18330 AT1G19050 AT1G19210 AT1G19510 <br>AT1G21910 AT1G26945 AT1G31050 AT1G43160 AT1G48000 AT1G52890 <br>AT1G53170 AT1G56650 AT1G59940 AT1G60920 AT1G62975 AT1G66230 <br>AT1G66380 AT1G66600 AT1G67710 AT1G72360 AT1G72830 AT1G74080 <br>AT1G80840 AT2G17150 AT2G22630 AT2G28700 AT2G36270 AT2G37430 <br>AT2G40340 AT2G40670 AT2G40750 AT2G43220 AT2G43500 AT2G44840 <br>AT2G46400 AT2G46510 AT2G46680 AT2G47190 AT2G47520 AT3G01970 <br>AT3G04070 AT3G04420 AT3G05690 AT3G11580 AT3G13760 AT3G15210 <br>AT3G23240 AT3G23250 AT3G24310 AT3G24500 AT3G25790 AT3G28730 <br>AT3G46080 AT3G48100 AT3G48360 AT3G48920 AT3G49760 AT3G51910 <br>AT3G56980 AT3G59060 AT4G13130 AT4G13620 AT4G17460 AT4G23810 <br>AT4G25470 AT4G25480 AT4G25490 AT4G27310 AT4G27410 AT4G29190 <br>AT4G30180 AT4G34410 AT4G39070 AT5G02350 AT5G04150 AT5G06510 <br>AT5G08790 AT5G10140 AT5G14750 AT5G15160 AT5G15830 AT5G17300 <br>AT5G21960 AT5G25810 AT5G28300 AT5G28770 AT5G37260 AT5G43650 <br>AT5G47220 AT5G47230 AT5G50915 AT5G51790 AT5G51990 AT5G58010 <br>AT5G62920 AT5G63160 AT5G64810 AT5G66700 | 2149 | 3.68E-01 |
| 11.02.03.04    | transcriptional control  | 100 | 7.83 | AT1G04240 AT1G13300 AT1G18330 AT1G19050 AT1G19210 AT1G19510 <br>AT1G21910 AT1G26945 AT1G31050 AT1G43160 AT1G48000 AT1G52890 <br>AT1G53170 AT1G56650 AT1G59940 AT1G60920 AT1G62975 AT1G66230 <br>AT1G66380 AT1G66600 AT1G67710 AT1G72360 AT1G72830 AT1G74080 <br>AT1G80840 AT2G17150 AT2G22630 AT2G28700 AT2G36270 AT2G37430 <br>AT2G40340 AT2G40670 AT2G40750 AT2G43220 AT2G43500 AT2G44840 <br>AT2G46400 AT2G46510 AT2G46680 AT2G47190 AT2G47520 AT3G01970 <br>AT3G04070 AT3G04420 AT3G05690 AT3G11580 AT3G13760 AT3G15210 <br>AT3G23240 AT3G23250 AT3G24310 AT3G24500 AT3G25790 AT3G28730 <br>AT3G46080 AT3G48100 AT3G48360 AT3G48920 AT3G49760 AT3G51910 <br>AT3G56980 AT3G59060 AT4G13130 AT4G13620 AT4G17460 AT4G23810 <br>AT4G25470 AT4G25480 AT4G25490 AT4G27310 AT4G27410 AT4G29190 <br>AT4G30180 AT4G34410 AT4G39070 AT5G02350 AT5G04150 AT5G06510 <br>AT5G08790 AT5G10140 AT5G14750 AT5G15160 AT5G15830 AT5G17300 <br>AT5G21960 AT5G25810 AT5G28300 AT5G28770 AT5G37260 AT5G43650 <br>AT5G47220 AT5G47230 AT5G50915 AT5G51790 AT5G51990 AT5G58010 <br>AT5G62920 AT5G63160 AT5G64810 AT5G66700 | 2117 | 3.11E-01 |
| 11.02.03.04.01 | transcription activation | 16  | 1.25 | AT1G72830 AT2G36270 AT2G46680 AT2G47190 AT3G05690 AT3G23240 <br>AT3G24500 AT4G25470 AT4G25480 AT4G25490 AT4G27410 AT5G06510 <br>AT5G08790 AT5G47220 AT5G47230 AT5G51990                                                                                                                                                                                                                                                                                                                                                                                                                                                                                                                                                                                                                                                                                                                                                                                                                                                                                                                                 | 114  | 5.08E-05 |
| 12             | <b>PROTEIN SYNTHESIS</b> | 2   | 0.15 | AT2G27535 AT4G34620                                                                                                                                                                                                                                                                                                                                                                                                                                                                                                                                                                                                                                                                                                                                                                                                                                                                                                                                                                                                                                                                                     | 1332 | 1.00E+00 |
| 12.04          | translation              | 2   | 0.15 | AT2G27535 AT4G34620                                                                                                                                                                                                                                                                                                                                                                                                                                                                                                                                                                                                                                                                                                                                                                                                                                                                                                                                                                                                                                                                                     | 1218 | 1.00E+00 |

|          |                                                                                 |     |      |                                                                                                                                                                                                                                                                                                                                                                                                                                                                                                                                                                                                                                                                                                                                                                                                                                                                                                                                                                                                                                                                                                                                                                                                                                                                                                                                                                                                                                                                                                                                                                                                                                                                       |      |          |
|----------|---------------------------------------------------------------------------------|-----|------|-----------------------------------------------------------------------------------------------------------------------------------------------------------------------------------------------------------------------------------------------------------------------------------------------------------------------------------------------------------------------------------------------------------------------------------------------------------------------------------------------------------------------------------------------------------------------------------------------------------------------------------------------------------------------------------------------------------------------------------------------------------------------------------------------------------------------------------------------------------------------------------------------------------------------------------------------------------------------------------------------------------------------------------------------------------------------------------------------------------------------------------------------------------------------------------------------------------------------------------------------------------------------------------------------------------------------------------------------------------------------------------------------------------------------------------------------------------------------------------------------------------------------------------------------------------------------------------------------------------------------------------------------------------------------|------|----------|
| 16       | PROTEIN WITH BINDING FUNCTION OR COFACTOR REQUIREMENT (structural or catalytic) | 302 | 23.6 | AT1G02520 AT1G03440 AT1G07610 AT1G11740 AT1G12740 AT1G13195 <br>AT1G13300 AT1G14150 AT1G14200 AT1G16400 AT1G17420 AT1G17745 <br>AT1G18330 AT1G19210 AT1G19510 AT1G21312 AT1G21910 AT1G22740 <br>AT1G23730 AT1G24530 AT1G31710 AT1G33340 AT1G43160 AT1G43910 <br>AT1G47840 AT1G48000 AT1G48605 AT1G50520 AT1G50560 AT1G51090 <br>AT1G52040 AT1G52250 AT1G53170 AT1G55780 AT1G56650 AT1G60190 <br>AT1G60920 AT1G60970 AT1G61380 AT1G61550 AT1G62975 AT1G63180 <br>AT1G64950 AT1G66230 AT1G66380 AT1G66400 AT1G68010 AT1G68110 <br>AT1G68290 AT1G72200 AT1G72260 AT1G72360 AT1G72610 AT1G72830 <br>AT1G73165 AT1G73800 AT1G74080 AT1G74690 AT1G74760 AT1G75290 <br>AT1G75580 AT1G75780 AT1G76410 AT1G76640 AT1G78450 AT1G78460 <br>AT1G78490 AT2G02010 AT2G02850 AT2G14160 AT2G15050 AT2G15400 <br>AT2G15430 AT2G15530 AT2G16060 AT2G16440 AT2G17270 AT2G17310 <br>AT2G17480 AT2G17510 AT2G18600 AT2G21880 AT2G22330 AT2G22500 <br>AT2G24600 AT2G25160 AT2G25430 AT2G28190 AT2G28700 AT2G28970 <br>AT2G29130 AT2G30210 AT2G30520 AT2G30750 AT2G30770 AT2G31081 <br>AT2G31082 AT2G31085 AT2G31200 AT2G31880 AT2G32300 AT2G33380 <br>AT2G34000 AT2G36270 AT2G37430 AT2G37870 AT2G38080 AT2G38230 <br>AT2G38530 AT2G38540 AT2G39350 AT2G39570 AT2G40340 AT2G41090 <br>AT2G43220 AT2G44580 AT2G44840 AT2G45040 AT2G46510 AT2G47190 <br>AT2G47520 AT3G01440 AT3G01500 AT3G02830 AT3G02850 AT3G04720 <br>AT3G05690 AT3G05950 AT3G09390 AT3G11110 AT3G11840 AT3G12145 <br>AT3G12610 AT3G13760 AT3G14620 AT3G15210 AT3G15354 AT3G20140 <br>AT3G20940 AT3G21180 AT3G22570 AT3G23240 AT3G23250 AT3G24310 <br>AT3G24500 AT3G25790 AT3G26180 AT3G26200 AT3G26830 AT3G27070 <br>..... | 7027 | 1.00E+00 |
|          |                                                                                 |     |      | AT1G03440 AT1G11740 AT1G13195 AT1G14200 AT1G24530 AT1G52040 <br>AT1G52250 AT1G60190 AT1G60970 AT1G63180 AT1G72200 AT1G72260 <br>AT1G72830 AT1G73165 AT1G73800 AT1G74690 AT1G74760 AT1G75580 <br>AT1G75780 AT1G76410 AT2G02010 AT2G15530 AT2G17310 AT2G17480 <br>AT2G18600 AT2G24600 AT2G30520 AT2G31081 AT2G31082 AT2G31085 <br>AT2G31200 AT2G34000 AT2G38230 AT2G38540 AT2G43220 AT2G44580 <br>AT2G47190 AT3G05690 AT3G11110 AT3G11840 AT3G12145 AT3G12610 <br>AT3G13760 AT3G15210 AT3G15354 AT3G21180 AT3G24500 AT3G27070 <br>AT3G48360 AT3G55150 AT3G56710 AT3G60020 AT3G62570 AT3G63380 <br>AT4G00680 AT4G04620 AT4G10720 AT4G13130 AT4G14365 AT4G14400 <br>AT4G18510 AT4G23060 AT4G24015 AT4G26270 AT4G34210 AT4G34470 <br>AT5G02350 AT5G03240 AT5G06510 AT5G06860 AT5G06870 AT5G09800 <br>AT5G10140 AT5G12940 AT5G14750 AT5G21430 AT5G26920 AT5G27420 <br>AT5G36910 AT5G37640 AT5G42040 AT5G52640 AT5G53500 AT5G54490 <br>AT5G54610 AT5G56630 AT5G63160                                                                                                                                                                                                                                                                                                                                                                                                                                                                                                                                                                                                                                                                                                         | 2619 | 1.00E+00 |
| 16.01    | protein binding                                                                 | 87  | 6.81 | AT1G72260 AT1G73165 AT2G31081 AT2G31082 AT2G31085 AT4G18510 <br>AT5G36910                                                                                                                                                                                                                                                                                                                                                                                                                                                                                                                                                                                                                                                                                                                                                                                                                                                                                                                                                                                                                                                                                                                                                                                                                                                                                                                                                                                                                                                                                                                                                                                             | 31   | 3.69E-04 |
| 16.01.01 | receptor binding                                                                | 7   | 0.54 | AT2G15050 AT2G37870 AT2G38530 AT3G22570 AT4G12490 AT4G12500 <br>AT4G12510 AT4G12520 AT4G12550 AT4G20370 AT4G22460 AT4G22470 <br>AT4G33550 AT5G01300 AT5G01870 AT5G05960 AT5G46890 AT5G59310 <br>AT5G59320                                                                                                                                                                                                                                                                                                                                                                                                                                                                                                                                                                                                                                                                                                                                                                                                                                                                                                                                                                                                                                                                                                                                                                                                                                                                                                                                                                                                                                                             | 141  | 1.88E-05 |
| 16.09    | lipid binding                                                                   | 19  | 1.48 |                                                                                                                                                                                                                                                                                                                                                                                                                                                                                                                                                                                                                                                                                                                                                                                                                                                                                                                                                                                                                                                                                                                                                                                                                                                                                                                                                                                                                                                                                                                                                                                                                                                                       |      |          |

|       |                                                                              |     |      |                                                                                                                                                                                                                                                                                                                                                                                                                                                                                                                                                                                                                                                                                                                                                                                                                                                                                                                                                                                                                                                                                                                                                                                                                                                                                                                                                                                                                                                                                                                                                                                                                                                             |      |          |
|-------|------------------------------------------------------------------------------|-----|------|-------------------------------------------------------------------------------------------------------------------------------------------------------------------------------------------------------------------------------------------------------------------------------------------------------------------------------------------------------------------------------------------------------------------------------------------------------------------------------------------------------------------------------------------------------------------------------------------------------------------------------------------------------------------------------------------------------------------------------------------------------------------------------------------------------------------------------------------------------------------------------------------------------------------------------------------------------------------------------------------------------------------------------------------------------------------------------------------------------------------------------------------------------------------------------------------------------------------------------------------------------------------------------------------------------------------------------------------------------------------------------------------------------------------------------------------------------------------------------------------------------------------------------------------------------------------------------------------------------------------------------------------------------------|------|----------|
| 16.17 | metal binding                                                                | 74  | 5.79 | AT1G07610 AT1G13195 AT1G14150 AT1G14200 AT1G17420 AT1G23730 <br>AT1G31710 AT1G51090 AT1G55780 AT1G66400 AT1G72200 AT1G72610 <br>AT1G74760 AT1G76410 AT1G76640 AT2G02850 AT2G15530 AT2G28190 <br>AT2G29130 AT2G30210 AT2G32300 AT2G33380 AT2G34000 AT2G37430 <br>AT2G38080 AT2G41090 AT2G43220 AT2G44580 AT2G45040 AT3G01440 <br>AT3G01500 AT3G05950 AT3G09390 AT3G11110 AT3G13760 AT3G28210 <br>AT3G46080 AT3G47480 AT3G50770 AT4G01380 AT4G12290 AT4G13130 <br>AT4G14365 AT4G14630 AT4G15440 AT4G24015 AT4G25380 AT4G27310 <br>AT4G37970 AT4G39070 AT5G02350 AT5G14740 AT5G16980 AT5G17000 <br>AT5G20630 AT5G22920 AT5G26690 AT5G27420 AT5G38910 AT5G38930 <br>AT5G38940 AT5G39110 AT5G39120 AT5G39130 AT5G39150 AT5G39160 <br>AT5G39180 AT5G39190 AT5G39670 AT5G42380 AT5G52720 AT5G52750 <br>AT5G52760 AT5G54490                                                                                                                                                                                                                                                                                                                                                                                                                                                                                                                                                                                                                                                                                                                                                                                                                                         | 1296 | 2.05E-02 |
| 16.25 | oxygen binding                                                               | 29  | 2.27 | AT1G12740 AT1G16400 AT1G50520 AT1G50560 AT1G64950 AT1G78490 <br>AT2G16060 AT2G22330 AT2G25160 AT2G30750 AT2G30770 AT3G14620 <br>AT3G20140 AT3G20940 AT3G26180 AT3G26200 AT3G26830 AT3G28740 <br>AT4G15300 AT4G22710 AT4G37370 AT4G37410 AT5G07990 AT5G08250 <br>AT5G25130 AT5G36220 AT5G38450 AT5G42580 AT5G57220                                                                                                                                                                                                                                                                                                                                                                                                                                                                                                                                                                                                                                                                                                                                                                                                                                                                                                                                                                                                                                                                                                                                                                                                                                                                                                                                           | 235  | 8.81E-07 |
| 20    | <b>CELLULAR TRANSPORT,<br/>TRANSPORT FACILITIES<br/>AND TRANSPORT ROUTES</b> | 161 | 12.6 | AT1G01580 AT1G01620 AT1G02520 AT1G06830 AT1G08430 AT1G12200 <br>AT1G12740 AT1G14185 AT1G16370 AT1G16390 AT1G22530 AT1G22740 <br>AT1G26380 AT1G26390 AT1G26400 AT1G26410 AT1G26420 AT1G28480 <br>AT1G30840 AT1G32350 AT1G42550 AT1G48605 AT1G50520 AT1G50560 <br>AT1G51090 AT1G53030 AT1G55780 AT1G59730 AT1G60970 AT1G61800 <br>AT1G62560 AT1G64780 AT1G64950 AT1G65860 AT1G66130 AT1G67640 <br>AT1G69880 AT1G71140 AT1G73220 AT1G78000 AT1G78490 AT2G02850 <br>AT2G04050 AT2G05620 AT2G15050 AT2G17270 AT2G18480 AT2G21880 <br>AT2G22500 AT2G24710 AT2G25160 AT2G29120 AT2G30540 AT2G30750 <br>AT2G30770 AT2G32300 AT2G34810 AT2G36830 AT2G37170 AT2G37180 <br>AT2G37870 AT2G38530 AT2G38540 AT2G46650 AT3G01760 AT3G02850 <br>AT3G05400 AT3G09340 AT3G09580 AT3G09940 AT3G14620 AT3G16240 <br>AT3G20140 AT3G20940 AT3G21180 AT3G22370 AT3G22570 AT3G24300 <br>AT3G26180 AT3G26200 AT3G26520 AT3G27070 AT3G28740 AT3G45690 <br>AT3G45700 AT3G45710 AT3G45720 AT3G48850 AT3G51895 AT3G55130 <br>AT3G55150 AT3G59020 AT3G61430 AT3G62950 AT3G63380 AT4G01380 <br>AT4G04850 AT4G08620 AT4G12490 AT4G12500 AT4G12510 AT4G12520 <br>AT4G12550 AT4G13420 AT4G14450 AT4G15300 AT4G15660 AT4G15670 <br>AT4G15680 AT4G15690 AT4G15700 AT4G16310 AT4G17340 AT4G19030 <br>AT4G19690 AT4G22460 AT4G22470 AT4G22710 AT4G23700 AT4G24120 <br>AT4G33040 AT4G33550 AT4G34580 AT4G35100 AT4G35180 AT4G37370 <br>AT4G37410 AT5G01180 AT5G01870 AT5G02270 AT5G03555 AT5G05960 <br>AT5G08250 AT5G09470 AT5G14070 AT5G16530 AT5G17860 AT5G18600 <br>AT5G24030 AT5G25130 AT5G26690 AT5G36220 AT5G38450 AT5G39320 <br>AT5G40370 AT5G42580 AT5G43350 AT5G43370 AT5G44110 AT5G46890 | 2419 | 2.46E-07 |



|                |                                    |     |      |                                                                                                                                                                                                                                                                                                                                                                                                                                                                                                                                                                                                                                                                                                                                                                                                                                                                                                                                                                                                                                                                                                                                                                                                                                                                                                                                                                                             |      |          |
|----------------|------------------------------------|-----|------|---------------------------------------------------------------------------------------------------------------------------------------------------------------------------------------------------------------------------------------------------------------------------------------------------------------------------------------------------------------------------------------------------------------------------------------------------------------------------------------------------------------------------------------------------------------------------------------------------------------------------------------------------------------------------------------------------------------------------------------------------------------------------------------------------------------------------------------------------------------------------------------------------------------------------------------------------------------------------------------------------------------------------------------------------------------------------------------------------------------------------------------------------------------------------------------------------------------------------------------------------------------------------------------------------------------------------------------------------------------------------------------------|------|----------|
| 20.01          | transported compounds (substrates) | 134 | 10.5 | AT1G01580 AT1G06830 AT1G08430 AT1G12200 AT1G12740 AT1G14185 AT1G16370 AT1G16390 AT1G22740 AT1G26380 AT1G26390 AT1G26400 AT1G26410 AT1G26420 AT1G28480 AT1G30840 AT1G32350 AT1G48605 AT1G50520 AT1G50560 AT1G51090 AT1G53030 AT1G55780 AT1G59730 AT1G60970 AT1G61800 AT1G62560 AT1G64780 AT1G64950 AT1G65860 AT1G66130 AT1G67640 AT1G69880 AT1G71140 AT1G73220 AT1G78000 AT1G78490 AT2G02850 AT2G04050 AT2G05620 AT2G15050 AT2G18480 AT2G21880 AT2G25160 AT2G30540 AT2G30750 AT2G30770 AT2G32300 AT2G34810 AT2G37870 AT2G38530 AT2G38540 AT2G46650 AT3G01760 AT3G02850 AT3G05400 AT3G09340 AT3G09580 AT3G09940 AT3G14620 AT3G16240 AT3G20140 AT3G20940 AT3G21180 AT3G22370 AT3G22570 AT3G24300 AT3G26180 AT3G26200 AT3G27070 AT3G28740 AT3G45690 AT3G45700 AT3G45710 AT3G45720 AT3G51895 AT3G59020 AT3G62950 AT3G63380 AT4G01380 AT4G04850 AT4G08620 AT4G12490 AT4G12500 AT4G12510 AT4G12520 AT4G12550 AT4G13420 AT4G15300 AT4G15660 AT4G15670 AT4G15680 AT4G15690 AT4G15700 AT4G16310 AT4G19690 AT4G22460 AT4G22470 AT4G22710 AT4G23700 AT4G24120 AT4G33040 AT4G33550 AT4G35180 AT4G37370 AT4G37410 AT5G01180 AT5G01870 AT5G03555 AT5G05960 AT5G08250 AT5G14070 AT5G16530 AT5G17860 AT5G18600 AT5G25130 AT5G26690 AT5G36220 AT5G38450 AT5G39320 AT5G40370 AT5G42580 AT5G43350 AT5G43370 AT5G46890 AT5G47450 AT5G49630 AT5G52720 AT5G52750 AT5G52760 AT5G57220 AT5G59310 AT5G59520 AT5G61440 | 1892 | 9.52E-08 |
| 20.01.01       | ion transport                      | 26  | 2.03 | AT1G01580 AT1G51090 AT1G53030 AT1G55780 AT1G64780 AT1G78000 AT3G02850 AT3G16240 AT3G21180 AT3G24300 AT3G51895 AT3G63380 AT4G04850 AT4G08620 AT4G13420 AT4G19690 AT4G23700 AT5G17860 AT5G26690 AT5G43350 AT5G43370 AT5G47450 AT5G52720 AT5G52750 AT5G52760 AT5G59520                                                                                                                                                                                                                                                                                                                                                                                                                                                                                                                                                                                                                                                                                                                                                                                                                                                                                                                                                                                                                                                                                                                         | 458  | 1.32E-01 |
| 20.01.01.07    | anion transport                    | 5   | 0.39 | AT1G78000 AT3G51895 AT4G08620 AT5G43350 AT5G43370                                                                                                                                                                                                                                                                                                                                                                                                                                                                                                                                                                                                                                                                                                                                                                                                                                                                                                                                                                                                                                                                                                                                                                                                                                                                                                                                           | 102  | 4.86E-01 |
| 20.01.01.07.05 | sulfate/sulfite transport          | 3   | 0.23 | AT1G78000 AT3G51895 AT4G08620                                                                                                                                                                                                                                                                                                                                                                                                                                                                                                                                                                                                                                                                                                                                                                                                                                                                                                                                                                                                                                                                                                                                                                                                                                                                                                                                                               | 14   | 2.27E-02 |
| 20.01.13       | lipid/fatty acid transport         | 17  | 1.33 | AT2G15050 AT2G37870 AT2G38530 AT2G38540 AT3G22570 AT4G12490 AT4G12500 AT4G12510 AT4G12520 AT4G12550 AT4G22460 AT4G22470 AT4G33550 AT5G01870 AT5G05960 AT5G46890 AT5G59310                                                                                                                                                                                                                                                                                                                                                                                                                                                                                                                                                                                                                                                                                                                                                                                                                                                                                                                                                                                                                                                                                                                                                                                                                   | 123  | 3.66E-05 |
| 20.01.15       | electron transport                 | 65  | 5.09 | AT1G01580 AT1G06830 AT1G12200 AT1G12740 AT1G14185 AT1G26380 AT1G26390 AT1G26400 AT1G26410 AT1G26420 AT1G28480 AT1G32350 AT1G48605 AT1G50520 AT1G50560 AT1G59730 AT1G62560 AT1G64950 AT1G65860 AT1G66130 AT1G69880 AT1G78490 AT2G02850 AT2G05620 AT2G25160 AT2G30540 AT2G30750 AT2G30770 AT2G32300 AT2G34810 AT2G46650 AT3G09580 AT3G09940 AT3G14620 AT3G20140 AT3G20940 AT3G22370 AT3G26180 AT3G26200 AT3G28740 AT3G62950 AT3G63380 AT4G01380 AT4G15300 AT4G15660 AT4G15670 AT4G15680 AT4G15690 AT4G15700 AT4G16310 AT4G22710 AT4G33040 AT4G37370 AT4G37410 AT5G08250 AT5G14070 AT5G18600 AT5G25130 AT5G36220 AT5G38450 AT5G39320 AT5G40370 AT5G42580 AT5G57220 AT5G61440                                                                                                                                                                                                                                                                                                                                                                                                                                                                                                                                                                                                                                                                                                                   | 717  | 7.13E-08 |

|             |                                                              |    |      |                                                                                                                                                                                                                                                                                                                                                                                                                                                                                                                                                                                                               |      |          |
|-------------|--------------------------------------------------------------|----|------|---------------------------------------------------------------------------------------------------------------------------------------------------------------------------------------------------------------------------------------------------------------------------------------------------------------------------------------------------------------------------------------------------------------------------------------------------------------------------------------------------------------------------------------------------------------------------------------------------------------|------|----------|
| 20.03       | transport facilities                                         | 38 | 2.97 | AT1G01620 AT1G22530 AT1G61800 AT1G71140 AT1G73220 AT2G04050 AT2G24710 AT2G29120 AT2G36830 AT2G37170 AT2G37180 AT3G02850 AT3G16240 AT3G21180 AT3G26520 AT3G27070 AT3G45690 AT3G45700 AT3G45710 AT3G45720 AT3G61430 AT3G63380 AT4G04850 AT4G13420 AT4G17340 AT4G19030 AT4G23700 AT4G34580 AT4G35100 AT5G01180 AT5G02270 AT5G16530 AT5G17860 AT5G24030 AT5G44110 AT5G47450 AT5G48410 AT5G60660                                                                                                                                                                                                                   | 600  | 2.17E-02 |
| 20.03.01    | channel / pore class transport                               | 16 | 1.25 | AT1G01620 AT2G24710 AT2G29120 AT2G36830 AT2G37170 AT2G37180 AT3G02850 AT3G16240 AT3G26520 AT3G61430 AT4G17340 AT4G19030 AT4G35100 AT5G47450 AT5G48410 AT5G60660                                                                                                                                                                                                                                                                                                                                                                                                                                               | 123  | 1.28E-04 |
| 30          | <b>CELLULAR COMMUNICATION/SIGNAL TRANSDUCTION MECHANISM</b>  | 59 | 4.62 | AT1G03440 AT1G19050 AT1G22740 AT1G24530 AT1G53170 AT1G56650 AT1G57630 AT1G59940 AT1G67710 AT1G72260 AT1G72360 AT1G72900 AT1G72910 AT1G72920 AT1G72940 AT1G73165 AT2G06050 AT2G19660 AT2G20145 AT2G21880 AT2G28970 AT2G31081 AT2G31082 AT2G31085 AT2G31880 AT2G34180 AT2G36270 AT2G36830 AT2G40670 AT2G44840 AT2G46680 AT3G03530 AT3G12610 AT3G15354 AT3G16360 AT3G19850 AT3G23240 AT3G24500 AT3G48100 AT3G56070 AT4G14980 AT4G18510 AT4G19515 AT4G28490 AT4G31250 AT5G06860 AT5G06870 AT5G09290 AT5G12940 AT5G15230 AT5G17970 AT5G24100 AT5G45090 AT5G45350 AT5G47220 AT5G47230 AT5G49770 AT5G53500 AT5G62920 | 1283 | 4.44E-01 |
| 30.01       | cellular signalling                                          | 35 | 2.74 | AT1G19050 AT1G22740 AT1G24530 AT1G53170 AT1G59940 AT1G67710 AT1G72260 AT1G72360 AT2G06050 AT2G19660 AT2G21880 AT2G28970 AT2G31880 AT2G36270 AT2G36830 AT2G40670 AT2G44840 AT2G46680 AT3G03530 AT3G15354 AT3G16360 AT3G23240 AT3G24500 AT3G48100 AT4G14980 AT4G28490 AT4G31250 AT5G09290 AT5G15230 AT5G24100 AT5G47220 AT5G47230 AT5G49770 AT5G53500 AT5G62920                                                                                                                                                                                                                                                 | 871  | 1.00E+00 |
| 30.01.05    | enzyme mediated signal transduction                          | 15 | 1.17 | AT1G19050 AT1G22740 AT1G24530 AT1G59940 AT2G21880 AT2G28970 AT2G31880 AT3G15354 AT3G16360 AT4G28490 AT4G31250 AT5G24100 AT5G49770 AT5G53500 AT5G62920                                                                                                                                                                                                                                                                                                                                                                                                                                                         | 446  | 1.00E+00 |
| 30.01.05.07 | two-component signal transduction system (e.g. phosphorelav) | 4  | 0.31 | AT1G19050 AT1G59940 AT3G16360 AT5G62920                                                                                                                                                                                                                                                                                                                                                                                                                                                                                                                                                                       | 21   | 1.31E-02 |
| 30.01.09.08 | hormone mediated signal transduction                         | 18 | 1.41 | AT1G19050 AT1G53170 AT1G59940 AT1G67710 AT1G72260 AT1G72360 AT2G36830 AT2G40670 AT2G44840 AT2G46680 AT3G16360 AT3G23240 AT3G24500 AT3G48100 AT5G15230 AT5G47220 AT5G47230 AT5G62920                                                                                                                                                                                                                                                                                                                                                                                                                           | 205  | 5.29E-03 |

|       |                                    |     |      |                                                             |      |          |
|-------|------------------------------------|-----|------|-------------------------------------------------------------|------|----------|
| 32    | CELL RESCUE, DEFENSE AND VIRULENCE | 189 | 14.8 | AT1G01620 AT1G02920 AT1G02930 AT1G05240 AT1G05250 AT1G06830 | 1425 | 2.88E-42 |
|       |                                    |     |      | AT1G07400 AT1G17180 AT1G17190 AT1G17420 AT1G18330 AT1G19610 |      |          |
| 32.01 | stress response                    | 115 | 9.01 | AT1G19670 AT1G20620 AT1G28480 AT1G29395 AT1G30870 AT1G31580 | 832  | 3.13E-27 |
|       |                                    |     |      | AT1G34510 AT1G48000 AT1G48605 AT1G49860 AT1G52040 AT1G52890 |      |          |
|       |                                    |     |      | AT1G53680 AT1G56650 AT1G57630 AT1G59700 AT1G59730 AT1G60740 |      |          |
|       |                                    |     |      | AT1G64160 AT1G65060 AT1G69880 AT1G69920 AT1G69930 AT1G72260 |      |          |
|       |                                    |     |      | AT1G72900 AT1G72910 AT1G72920 AT1G72940 AT1G74590 AT1G75280 |      |          |
|       |                                    |     |      | AT1G75830 AT1G77120 AT1G78290 AT1G78380 AT1G80840 AT2G02120 |      |          |
|       |                                    |     |      | AT2G02930 AT2G02990 AT2G03760 AT2G06050 AT2G14610 AT2G15220 |      |          |
|       |                                    |     |      | AT2G16060 AT2G17480 AT2G18140 AT2G18150 AT2G19190 AT2G20145 |      |          |
|       |                                    |     |      | AT2G21640 AT2G23680 AT2G24850 AT2G26010 AT2G26020 AT2G28190 |      |          |
|       |                                    |     |      | AT2G29440 AT2G29460 AT2G29470 AT2G30540 AT2G33380 AT2G34810 |      |          |
|       |                                    |     |      | AT2G36270 AT2G36830 AT2G37130 AT2G37170 AT2G37180 AT2G39040 |      |          |
|       |                                    |     |      | AT2G39800 AT2G42530 AT2G42540 AT2G43510 AT2G43530 AT2G46680 |      |          |
|       |                                    |     |      | AT2G47180 AT2G47190 AT2G48150 AT3G01190 AT3G03190 AT3G05890 |      |          |
|       |                                    |     |      | AT3G12500 AT3G12610 AT3G13650 AT3G14210 AT3G14440 AT3G17790 |      |          |
|       |                                    |     |      | AT3G22370 AT3G23240 AT3G23250 AT3G24500 AT3G25760 AT3G26520 |      |          |
|       |                                    |     |      | AT3G30775 AT3G45140 AT3G49110 AT3G49960 AT3G51910 AT3G55120 |      |          |
|       |                                    |     |      | AT3G57260 AT3G61430 AT3G62760 AT3G62950 AT4G02520 AT4G08770 |      |          |
|       |                                    |     |      | AT4G08780 AT4G10270 AT4G11210 AT4G11290 AT4G11600 AT4G12490 |      |          |
|       |                                    |     |      | AT4G15660 AT4G15670 AT4G15680 AT4G15690 AT4G15700 AT4G17340 |      |          |
|       |                                    |     |      | AT4G21830 AT4G22880 AT4G23190 AT4G23600 AT4G25470 AT4G25480 |      |          |
|       |                                    |     |      | AT4G25490 AT4G26010 AT4G27410 AT4G30170 AT4G30650 AT4G31870 |      |          |
|       |                                    |     |      | AT4G33040 AT4G34710 AT4G35100 AT4G37220 AT4G37760 AT4G38410 |      |          |
|       |                                    |     |      | AT5G05340 AT5G06720 AT5G06730 AT5G06860 AT5G06870 AT5G07990 |      |          |
|       |                                    |     |      | -----                                                       |      |          |
|       |                                    |     |      | AT1G01620 AT1G02930 AT1G05240 AT1G05250 AT1G07400 AT1G17420 |      |          |
|       |                                    |     |      | AT1G18330 AT1G19670 AT1G29395 AT1G30870 AT1G34510 AT1G48000 |      |          |
|       |                                    |     |      | AT1G48605 AT1G52890 AT1G56650 AT1G65060 AT1G75280 AT1G77120 |      |          |
|       |                                    |     |      | AT1G78290 AT1G78380 AT2G02990 AT2G06050 AT2G16060 AT2G18140 |      |          |
|       |                                    |     |      | AT2G21640 AT2G23680 AT2G24850 AT2G28190 AT2G33380 AT2G34810 |      |          |
|       |                                    |     |      | AT2G36270 AT2G36830 AT2G37170 AT2G37180 AT2G39040 AT2G39800 |      |          |
|       |                                    |     |      | AT2G42530 AT2G42540 AT2G46680 AT2G47180 AT2G47190 AT2G48150 |      |          |
|       |                                    |     |      | AT3G01190 AT3G03190 AT3G05890 AT3G12610 AT3G14210 AT3G14440 |      |          |
|       |                                    |     |      | AT3G17790 AT3G22370 AT3G23250 AT3G24500 AT3G25760 AT3G26520 |      |          |
|       |                                    |     |      | AT3G30775 AT3G45140 AT3G49110 AT3G49960 AT3G51910 AT3G55120 |      |          |
|       |                                    |     |      | AT3G57260 AT3G61430 AT4G02520 AT4G08770 AT4G08780 AT4G10270 |      |          |
|       |                                    |     |      | AT4G11290 AT4G17340 AT4G21830 AT4G22880 AT4G23190 AT4G23600 |      |          |
|       |                                    |     |      | AT4G25470 AT4G25480 AT4G25490 AT4G26010 AT4G27410 AT4G30170 |      |          |
|       |                                    |     |      | AT4G30650 AT4G31870 AT4G34710 AT4G35100 AT4G37220 AT4G37760 |      |          |
|       |                                    |     |      | AT4G38410 AT5G05340 AT5G06720 AT5G06730 AT5G07990 AT5G08790 |      |          |
|       |                                    |     |      | AT5G13930 AT5G14130 AT5G14780 AT5G15180 AT5G15970 AT5G16970 |      |          |
|       |                                    |     |      | AT5G16980 AT5G17000 AT5G17820 AT5G20630 AT5G22410 AT5G24770 |      |          |
|       |                                    |     |      | AT5G25610 AT5G27760 AT5G37260 AT5G42180 AT5G43570 AT5G43580 |      |          |
|       |                                    |     |      | AT5G47230 AT5G47450 AT5G49630 AT5G52640 AT5G58390 AT5G64100 |      |          |
|       |                                    |     |      | AT5G67400                                                   |      |          |

|          |                                                        |    |      |                                                                                                                                                                                                                                                                                                                                                                                                                                                                                                                                                                                                                                                                                                                                                                         |     |          |
|----------|--------------------------------------------------------|----|------|-------------------------------------------------------------------------------------------------------------------------------------------------------------------------------------------------------------------------------------------------------------------------------------------------------------------------------------------------------------------------------------------------------------------------------------------------------------------------------------------------------------------------------------------------------------------------------------------------------------------------------------------------------------------------------------------------------------------------------------------------------------------------|-----|----------|
| 32.01.01 | oxidative stress response                              | 45 | 3.52 | AT1G02930 AT1G05240 AT1G05250 AT1G07400 AT1G30870 AT1G34510 <br>AT1G75280 AT1G78380 AT2G18140 AT2G21640 AT2G28190 AT2G39040 <br>AT2G47180 AT2G48150 AT3G01190 AT3G03190 AT3G17790 AT3G30775 <br>AT3G49110 AT3G49960 AT4G08770 AT4G08780 AT4G11290 AT4G21830 <br>AT4G23190 AT4G26010 AT4G30170 AT4G31870 AT4G34710 AT5G05340 <br>AT5G06720 AT5G06730 AT5G13930 AT5G14130 AT5G15180 AT5G16970 <br>AT5G16980 AT5G17000 AT5G17820 AT5G22410 AT5G24770 AT5G42180 <br>AT5G58390 AT5G64100 AT5G67400                                                                                                                                                                                                                                                                           | 200 | 1.76E-19 |
| 32.01.03 | osmotic and salt stress response                       | 30 | 2.35 | AT1G01620 AT1G18330 AT1G48000 AT1G48605 AT1G56650 AT1G77120 <br>AT1G78290 AT2G33380 AT2G36270 AT2G36830 AT2G37170 AT2G37180 <br>AT2G39800 AT2G42540 AT2G47190 AT3G14440 AT3G23250 AT3G26520 <br>AT3G61430 AT4G17340 AT4G23600 AT4G30650 AT4G34710 AT4G35100 <br>AT5G15970 AT5G24770 AT5G25610 AT5G37260 AT5G47450 AT5G49630                                                                                                                                                                                                                                                                                                                                                                                                                                             | 205 | 1.24E-08 |
| 32.01.06 | cold shock response                                    | 15 | 1.17 | AT1G29395 AT2G42530 AT2G42540 AT3G05890 AT3G14210 AT3G22370 <br>AT3G57260 AT4G02520 AT4G25470 AT4G25480 AT4G25490 AT4G30650 <br>AT5G15970 AT5G20630 AT5G47230                                                                                                                                                                                                                                                                                                                                                                                                                                                                                                                                                                                                           | 165 | 7.61E-03 |
| 32.01.13 | electromagnetic waves stress response (e.g. UV, X-rav) | 4  | 0.31 | AT1G65060 AT3G12610 AT3G55120 AT5G07990                                                                                                                                                                                                                                                                                                                                                                                                                                                                                                                                                                                                                                                                                                                                 | 29  | 3.93E-02 |
| 32.05    | disease, virulence and defense                         | 42 | 3.29 | AT1G17420 AT1G19610 AT1G31580 AT1G52040 AT1G57630 AT1G64160 <br>AT1G72260 AT1G72900 AT1G72910 AT1G72920 AT1G72940 AT1G75830 <br>AT1G80840 AT2G02120 AT2G03760 AT2G14610 AT2G15220 AT2G17480 <br>AT2G19190 AT2G20145 AT2G26010 AT2G26020 AT2G37130 AT2G43510 <br>AT2G43530 AT3G12500 AT3G12610 AT3G13650 AT3G23240 AT3G49110 <br>AT4G11210 AT4G12490 AT5G06860 AT5G06870 AT5G13320 AT5G17970 <br>AT5G36910 AT5G42510 AT5G44420 AT5G44430 AT5G45090 AT5G52640                                                                                                                                                                                                                                                                                                             | 460 | 1.21E-05 |
| 32.05.01 | resistance proteins                                    | 1  | 0.07 | AT3G12610                                                                                                                                                                                                                                                                                                                                                                                                                                                                                                                                                                                                                                                                                                                                                               | 4   | 1.68E-01 |
| 32.07    | detoxification                                         | 70 | 5.48 | AT1G02920 AT1G02930 AT1G05240 AT1G05250 AT1G06830 AT1G17180 <br>AT1G17190 AT1G20620 AT1G28480 AT1G30870 AT1G34510 AT1G49860 <br>AT1G53680 AT1G56650 AT1G59700 AT1G59730 AT1G60740 AT1G69880 <br>AT1G69920 AT1G69930 AT1G74590 AT1G78380 AT2G02930 AT2G18140 <br>AT2G18150 AT2G28190 AT2G29440 AT2G29460 AT2G29470 AT2G30540 <br>AT2G37130 AT2G39040 AT2G48150 AT3G01190 AT3G03190 AT3G49110 <br>AT3G49960 AT3G62760 AT3G62950 AT4G02520 AT4G08770 AT4G08780 <br>AT4G11290 AT4G11600 AT4G15660 AT4G15670 AT4G15680 AT4G15690 <br>AT4G15700 AT4G26010 AT4G30170 AT4G31870 AT4G33040 AT5G05340 <br>AT5G06720 AT5G06730 AT5G14070 AT5G14130 AT5G15180 AT5G17220 <br>AT5G17820 AT5G18600 AT5G22410 AT5G36270 AT5G40370 AT5G42180 <br>AT5G58390 AT5G61440 AT5G64100 AT5G67400 | 266 | 3.38E-34 |

|             |                                         |     |      |                                                                                                                                                                                                                                                                                                                                                                                                                                                                                                                                                                                                                                                                                                                                                                                                                                                                                                                                                                                                                                                                                                                                                                                                                                                                                                                                                                                                                                                                                                                                                             |      |          |
|-------------|-----------------------------------------|-----|------|-------------------------------------------------------------------------------------------------------------------------------------------------------------------------------------------------------------------------------------------------------------------------------------------------------------------------------------------------------------------------------------------------------------------------------------------------------------------------------------------------------------------------------------------------------------------------------------------------------------------------------------------------------------------------------------------------------------------------------------------------------------------------------------------------------------------------------------------------------------------------------------------------------------------------------------------------------------------------------------------------------------------------------------------------------------------------------------------------------------------------------------------------------------------------------------------------------------------------------------------------------------------------------------------------------------------------------------------------------------------------------------------------------------------------------------------------------------------------------------------------------------------------------------------------------------|------|----------|
| 32.07.03    | detoxification by modification          | 7   | 0.54 | AT4G15660 AT4G15670 AT4G15680 AT4G15690 AT4G15700 AT5G18600 AT5G40370                                                                                                                                                                                                                                                                                                                                                                                                                                                                                                                                                                                                                                                                                                                                                                                                                                                                                                                                                                                                                                                                                                                                                                                                                                                                                                                                                                                                                                                                                       | 17   | 4.74E-06 |
| 32.07.07    | oxygen and radical detoxification       | 70  | 5.48 | AT1G02920 AT1G02930 AT1G05240 AT1G05250 AT1G06830 AT1G17180 AT1G17190 AT1G20620 AT1G28480 AT1G30870 AT1G34510 AT1G49860 AT1G53680 AT1G56650 AT1G59700 AT1G59730 AT1G60740 AT1G69880 AT1G69920 AT1G69930 AT1G74590 AT1G78380 AT2G02930 AT2G18140 AT2G18150 AT2G28190 AT2G29440 AT2G29460 AT2G29470 AT2G30540 AT2G37130 AT2G39040 AT2G48150 AT3G01190 AT3G03190 AT3G49110 AT3G49960 AT3G62760 AT3G62950 AT4G02520 AT4G08770 AT4G08780 AT4G11290 AT4G11600 AT4G15660 AT4G15670 AT4G15680 AT4G15690 AT4G15700 AT4G26010 AT4G30170 AT4G31870 AT4G33040 AT5G05340 AT5G06720 AT5G06730 AT5G14070 AT5G14130 AT5G15180 AT5G17220 AT5G17820 AT5G18600 AT5G22410 AT5G36270 AT5G40370 AT5G42180 AT5G58390 AT5G61440 AT5G64100 AT5G67400                                                                                                                                                                                                                                                                                                                                                                                                                                                                                                                                                                                                                                                                                                                                                                                                                                 | 261  | 8.99E-35 |
| 32.07.07.03 | glutathione conjugation reaction        | 20  | 1.56 | AT1G02920 AT1G02930 AT1G17180 AT1G17190 AT1G49860 AT1G53680 AT1G59700 AT1G69920 AT1G69930 AT1G74590 AT1G78380 AT2G02930 AT2G29440 AT2G29460 AT2G29470 AT3G03190 AT3G62760 AT4G02520 AT5G17220 AT5G36270                                                                                                                                                                                                                                                                                                                                                                                                                                                                                                                                                                                                                                                                                                                                                                                                                                                                                                                                                                                                                                                                                                                                                                                                                                                                                                                                                     | 57   | 2.38E-13 |
| 32.07.07.05 | peroxidase reaction                     | 31  | 2.42 | AT1G05240 AT1G05250 AT1G20620 AT1G30870 AT1G34510 AT2G18140 AT2G18150 AT2G37130 AT2G39040 AT2G48150 AT3G01190 AT3G49110 AT3G49960 AT4G08770 AT4G08780 AT4G11290 AT4G11600 AT4G26010 AT4G30170 AT4G31870 AT5G05340 AT5G06720 AT5G06730 AT5G14130 AT5G15180 AT5G17820 AT5G22410 AT5G42180 AT5G58390 AT5G64100 AT5G67400                                                                                                                                                                                                                                                                                                                                                                                                                                                                                                                                                                                                                                                                                                                                                                                                                                                                                                                                                                                                                                                                                                                                                                                                                                       | 94   | 5.09E-19 |
| 34          | <b>INTERACTION WITH THE ENVIRONMENT</b> | 165 | 12.9 | AT1G01580 AT1G01620 AT1G02930 AT1G03870 AT1G04240 AT1G07400 AT1G07610 AT1G08430 AT1G17345 AT1G18330 AT1G19050 AT1G29395 AT1G29490 AT1G48000 AT1G48605 AT1G52250 AT1G52890 AT1G56650 AT1G59940 AT1G64780 AT1G65060 AT1G66380 AT1G67710 AT1G72430 AT1G75040 AT1G75580 AT1G75750 AT1G75780 AT1G77120 AT1G78290 AT1G78380 AT1G80840 AT2G06050 AT2G14580 AT2G16060 AT2G16580 AT2G17310 AT2G18010 AT2G18150 AT2G19190 AT2G23170 AT2G24710 AT2G24850 AT2G28190 AT2G28670 AT2G29120 AT2G30520 AT2G33380 AT2G34810 AT2G36270 AT2G36830 AT2G37130 AT2G37170 AT2G37180 AT2G38230 AT2G39350 AT2G39800 AT2G40080 AT2G40340 AT2G40670 AT2G42530 AT2G42540 AT2G43510 AT2G46680 AT2G47180 AT2G47190 AT3G02850 AT3G02885 AT3G04720 AT3G05890 AT3G09390 AT3G09940 AT3G12500 AT3G12610 AT3G12955 AT3G14210 AT3G14440 AT3G15210 AT3G17790 AT3G18780 AT3G19850 AT3G22231 AT3G22370 AT3G23250 AT3G24500 AT3G25760 AT3G26520 AT3G26830 AT3G28210 AT3G28580 AT3G28930 AT3G44300 AT3G45140 AT3G48100 AT3G48920 AT3G49110 AT3G51240 AT3G51910 AT3G55120 AT3G57240 AT3G57260 AT3G60140 AT3G61430 AT4G02520 AT4G04850 AT4G11650 AT4G12490 AT4G12550 AT4G12730 AT4G14400 AT4G15480 AT4G17340 AT4G19690 AT4G22880 AT4G23170 AT4G23190 AT4G23600 AT4G24120 AT4G25470 AT4G25480 AT4G25490 AT4G27410 AT4G30650 AT4G34710 AT4G34790 AT4G34800 AT4G35100 AT4G36110 AT4G36220 AT4G37390 AT4G37760 AT4G37990 AT4G38410 AT4G38860 AT5G03240 AT5G03310 AT5G07990 AT5G08790 AT5G10140 AT5G13320 AT5G13370 AT5G13930 AT5G15230 AT5G15970 AT5G20250 AT5G20630 AT5G24770 AT5G24860 AT5G25610 AT5G27420 | 1651 | 1.36E-22 |

|             |                                                    |     |      |                                                                                                                                                                                                                                                                                                                                                                                                                                                                                                                                                                                                                                                                                                                                                                                                                                                                                                                                                                                                                                                                                                                                                                                                                                                                                                                                                                                                                                                                                                                                                             |      |          |
|-------------|----------------------------------------------------|-----|------|-------------------------------------------------------------------------------------------------------------------------------------------------------------------------------------------------------------------------------------------------------------------------------------------------------------------------------------------------------------------------------------------------------------------------------------------------------------------------------------------------------------------------------------------------------------------------------------------------------------------------------------------------------------------------------------------------------------------------------------------------------------------------------------------------------------------------------------------------------------------------------------------------------------------------------------------------------------------------------------------------------------------------------------------------------------------------------------------------------------------------------------------------------------------------------------------------------------------------------------------------------------------------------------------------------------------------------------------------------------------------------------------------------------------------------------------------------------------------------------------------------------------------------------------------------------|------|----------|
| 34.01       | homeostasis                                        | 8   | 0.62 | AT1G01580 AT2G24710 AT2G29120 AT3G09390 AT3G17790 AT4G04850 AT4G19690 AT5G48410                                                                                                                                                                                                                                                                                                                                                                                                                                                                                                                                                                                                                                                                                                                                                                                                                                                                                                                                                                                                                                                                                                                                                                                                                                                                                                                                                                                                                                                                             | 77   | 2.21E-02 |
| 34.01.01    | homeostasis of cations                             | 6   | 0.47 | AT1G01580 AT2G24710 AT2G29120 AT3G09390 AT4G19690 AT5G48410                                                                                                                                                                                                                                                                                                                                                                                                                                                                                                                                                                                                                                                                                                                                                                                                                                                                                                                                                                                                                                                                                                                                                                                                                                                                                                                                                                                                                                                                                                 | 60   | 5.19E-02 |
| 34.01.01.01 | homeostasis of metal ions (Na, K, Ca etc.)         | 6   | 0.47 | AT1G01580 AT2G24710 AT2G29120 AT3G09390 AT4G19690 AT5G48410                                                                                                                                                                                                                                                                                                                                                                                                                                                                                                                                                                                                                                                                                                                                                                                                                                                                                                                                                                                                                                                                                                                                                                                                                                                                                                                                                                                                                                                                                                 | 58   | 4.52E-02 |
| 34.11       | cellular sensing and response to external stimulus | 156 | 12.2 | AT1G01620 AT1G02930 AT1G04240 AT1G07400 AT1G07610 AT1G08430 AT1G17345 AT1G18330 AT1G19050 AT1G29395 AT1G29490 AT1G48000 AT1G48605 AT1G52890 AT1G56650 AT1G59940 AT1G64780 AT1G65060 AT1G66380 AT1G67710 AT1G72430 AT1G75040 AT1G75580 AT1G75750 AT1G75780 AT1G77120 AT1G78290 AT1G78380 AT1G80840 AT2G06050 AT2G14580 AT2G16060 AT2G16580 AT2G17310 AT2G18010 AT2G18150 AT2G19190 AT2G23170 AT2G24710 AT2G24850 AT2G28190 AT2G28670 AT2G29120 AT2G30520 AT2G33380 AT2G34810 AT2G36270 AT2G36830 AT2G37130 AT2G37170 AT2G37180 AT2G38230 AT2G39350 AT2G39800 AT2G40080 AT2G40340 AT2G40670 AT2G42530 AT2G42540 AT2G43510 AT2G46680 AT2G47180 AT2G47190 AT3G02850 AT3G02885 AT3G04720 AT3G05890 AT3G09940 AT3G12500 AT3G12610 AT3G12955 AT3G14210 AT3G14440 AT3G15210 AT3G18780 AT3G19850 AT3G22231 AT3G22370 AT3G23250 AT3G24500 AT3G25760 AT3G26520 AT3G26830 AT3G28210 AT3G28580 AT3G28930 AT3G44300 AT3G45140 AT3G48100 AT3G48920 AT3G49110 AT3G51240 AT3G51910 AT3G55120 AT3G57240 AT3G57260 AT3G60140 AT3G61430 AT4G02520 AT4G11650 AT4G12490 AT4G12550 AT4G14400 AT4G15480 AT4G17340 AT4G22880 AT4G23170 AT4G23190 AT4G23600 AT4G24120 AT4G25470 AT4G25480 AT4G25490 AT4G27410 AT4G30650 AT4G34710 AT4G34790 AT4G34800 AT4G35100 AT4G36110 AT4G36220 AT4G37390 AT4G37760 AT4G37990 AT4G38410 AT4G38860 AT5G03240 AT5G03310 AT5G07990 AT5G08790 AT5G10140 AT5G13320 AT5G13370 AT5G13930 AT5G15230 AT5G15970 AT5G20250 AT5G20630 AT5G24770 AT5G24860 AT5G25610 AT5G27420 AT5G37260 AT5G44420 AT5G47230 AT5G47450 AT5G48410 AT5G49630 AT5G52640 AT5G54490 | 1489 | 2.00E-23 |
| 34.11.01    | photoperception and response                       | 26  | 2.03 | AT1G65060 AT1G75040 AT1G75780 AT2G24710 AT2G28190 AT2G29120 AT2G30520 AT2G38230 AT2G40080 AT2G47180 AT3G12610 AT3G18780 AT3G19850 AT3G49110 AT3G51240 AT3G51910 AT3G55120 AT3G60140 AT4G15480 AT4G36220 AT5G03240 AT5G07990 AT5G08790 AT5G13930 AT5G20250 AT5G48410                                                                                                                                                                                                                                                                                                                                                                                                                                                                                                                                                                                                                                                                                                                                                                                                                                                                                                                                                                                                                                                                                                                                                                                                                                                                                         | 265  | 1.70E-04 |

|             |                              |     |      |                                                                                                                                                                                                                                                                                                                                                                                                                                                                                                                                                                                                                                                                                                                                                                                                                                                                                                                                                                                                                                                                                                     |     |          |
|-------------|------------------------------|-----|------|-----------------------------------------------------------------------------------------------------------------------------------------------------------------------------------------------------------------------------------------------------------------------------------------------------------------------------------------------------------------------------------------------------------------------------------------------------------------------------------------------------------------------------------------------------------------------------------------------------------------------------------------------------------------------------------------------------------------------------------------------------------------------------------------------------------------------------------------------------------------------------------------------------------------------------------------------------------------------------------------------------------------------------------------------------------------------------------------------------|-----|----------|
| 34.11.03    | chemoperception and response | 106 | 8.3  | AT1G01620 AT1G02930 AT1G04240 AT1G07610 AT1G08430 AT1G17345 AT1G18330 AT1G19050 AT1G29395 AT1G29490 AT1G48000 AT1G48605 AT1G52890 AT1G56650 AT1G59940 AT1G66380 AT1G67710 AT1G72430 AT1G75580 AT1G75750 AT1G77120 AT1G78290 AT1G78380 AT1G80840 AT2G14580 AT2G16580 AT2G18010 AT2G23170 AT2G24850 AT2G28190 AT2G33380 AT2G34810 AT2G36270 AT2G36830 AT2G37170 AT2G37180 AT2G39800 AT2G40670 AT2G42540 AT2G46680 AT2G47190 AT3G02850 AT3G02885 AT3G04720 AT3G09940 AT3G12610 AT3G12955 AT3G14440 AT3G15210 AT3G18780 AT3G23250 AT3G24500 AT3G25760 AT3G26520 AT3G26830 AT3G28210 AT3G28580 AT3G45140 AT3G48100 AT3G48920 AT3G60140 AT3G61430 AT4G12550 AT4G14400 AT4G17340 AT4G22880 AT4G23170 AT4G23600 AT4G24120 AT4G25480 AT4G25490 AT4G27410 AT4G30650 AT4G34710 AT4G34790 AT4G34800 AT4G35100 AT4G36110 AT4G37390 AT4G37760 AT4G38410 AT4G38860 AT5G03310 AT5G08790 AT5G13320 AT5G13370 AT5G13930 AT5G15230 AT5G15970 AT5G20250 AT5G24770 AT5G24860 AT5G25610 AT5G27420 AT5G37260 AT5G44420 AT5G47450 AT5G49630 AT5G52640 AT5G54490 AT5G54610 AT5G59220 AT5G59310 AT5G59320 AT5G62920 AT5G66700 | 841 | 5.65E-22 |
| 34.11.03.12 | water response               | 25  | 1.95 | AT1G01620 AT1G02930 AT1G29395 AT1G52890 AT1G78290 AT1G78380 AT2G33380 AT2G36270 AT2G37170 AT2G37180 AT2G39800 AT2G46680 AT2G47190 AT3G14440 AT3G24500 AT3G25760 AT3G45140 AT3G61430 AT4G25480 AT4G25490 AT4G27410 AT4G38410 AT5G15970 AT5G25610 AT5G49630                                                                                                                                                                                                                                                                                                                                                                                                                                                                                                                                                                                                                                                                                                                                                                                                                                           | 119 | 9.23E-11 |
| 34.11.03.13 | osmosensing and response     | 30  | 2.35 | AT1G01620 AT1G18330 AT1G48000 AT1G48605 AT1G56650 AT1G77120 AT1G78290 AT2G33380 AT2G36270 AT2G36830 AT2G37170 AT2G37180 AT2G39800 AT2G42540 AT2G47190 AT3G14440 AT3G23250 AT3G26520 AT3G61430 AT4G17340 AT4G23600 AT4G30650 AT4G34710 AT4G35100 AT5G15970 AT5G24770 AT5G25610 AT5G37260 AT5G47450 AT5G49630                                                                                                                                                                                                                                                                                                                                                                                                                                                                                                                                                                                                                                                                                                                                                                                         | 208 | 1.74E-08 |
| 34.11.10    | response to biotic stimulus  | 27  | 2.11 | AT1G64780 AT1G80840 AT2G17310 AT2G18150 AT2G19190 AT2G28670 AT2G37130 AT2G39350 AT2G43510 AT3G04720 AT3G12500 AT3G14210 AT3G22231 AT3G28930 AT3G44300 AT3G49110 AT3G57240 AT4G11650 AT4G12490 AT4G14400 AT4G23190 AT4G37990 AT5G08790 AT5G13320 AT5G24770 AT5G44420 AT5G52640                                                                                                                                                                                                                                                                                                                                                                                                                                                                                                                                                                                                                                                                                                                                                                                                                       | 296 | 4.17E-04 |

|             |                                                       |    |      |                                                                                                                                                                                                                                                                                                                                                                                                                                                                                                                                                                                                                                                                                                                                                                                                                                                                                                                                                                                                                     |     |          |
|-------------|-------------------------------------------------------|----|------|---------------------------------------------------------------------------------------------------------------------------------------------------------------------------------------------------------------------------------------------------------------------------------------------------------------------------------------------------------------------------------------------------------------------------------------------------------------------------------------------------------------------------------------------------------------------------------------------------------------------------------------------------------------------------------------------------------------------------------------------------------------------------------------------------------------------------------------------------------------------------------------------------------------------------------------------------------------------------------------------------------------------|-----|----------|
| 36          | <b>SYSTEMIC INTERACTION WITH THE ENVIRONMENT</b>      | 92 | 7.21 | AT1G03620 AT1G04240 AT1G17345 AT1G17420 AT1G18330 AT1G19050 <br>AT1G29395 AT1G29490 AT1G48000 AT1G56650 AT1G59940 AT1G66380 <br>AT1G67710 AT1G72430 AT1G75040 AT1G75580 AT1G75750 AT1G80840 <br>AT2G02990 AT2G06050 AT2G14580 AT2G14610 AT2G16580 AT2G18010 <br>AT2G22330 AT2G23170 AT2G24850 AT2G33380 AT2G34810 AT2G36270 <br>AT2G39800 AT2G40670 AT2G46680 AT2G47190 AT3G02850 AT3G02885 <br>AT3G04720 AT3G09940 AT3G12500 AT3G12955 AT3G14210 AT3G15210 <br>AT3G18780 AT3G23250 AT3G24500 AT3G26830 AT3G28210 AT3G28580 <br>AT3G45140 AT3G48100 AT3G48920 AT3G57260 AT4G10270 AT4G11650 <br>AT4G12550 AT4G14400 AT4G22880 AT4G23170 AT4G23190 AT4G23600 <br>AT4G27410 AT4G34710 AT4G34790 AT4G34800 AT4G36110 AT4G37390 <br>AT4G37760 AT4G38860 AT5G03310 AT5G08790 AT5G13320 AT5G13370 <br>AT5G13930 AT5G14780 AT5G15230 AT5G15970 AT5G24770 AT5G24860 <br>AT5G25610 AT5G27420 AT5G37260 AT5G43570 AT5G43580 AT5G44420 <br>AT5G47220 AT5G54490 AT5G54610 AT5G59220 AT5G59310 AT5G59320 <br>AT5G62920 AT5G66700 | 757 | 3.79E-18 |
| 36.20       | plant / fungal specific systemic sensing and response | 84 | 6.58 | AT1G04240 AT1G17345 AT1G18330 AT1G19050 AT1G29395 AT1G29490 <br>AT1G48000 AT1G56650 AT1G59940 AT1G66380 AT1G67710 AT1G72430 <br>AT1G75040 AT1G75580 AT1G75750 AT1G80840 AT2G14580 AT2G14610 <br>AT2G16580 AT2G18010 AT2G22330 AT2G23170 AT2G24850 AT2G33380 <br>AT2G34810 AT2G36270 AT2G39800 AT2G40670 AT2G46680 AT2G47190 <br>AT3G02850 AT3G02885 AT3G04720 AT3G09940 AT3G12500 AT3G12955 <br>AT3G14210 AT3G15210 AT3G18780 AT3G23250 AT3G24500 AT3G26830 <br>AT3G28210 AT3G28580 AT3G45140 AT3G48100 AT3G48920 AT3G57260 <br>AT4G11650 AT4G12550 AT4G14400 AT4G22880 AT4G23170 AT4G23190 <br>AT4G23600 AT4G27410 AT4G34710 AT4G34790 AT4G34800 AT4G36110 <br>AT4G37390 AT4G37760 AT4G38860 AT5G03310 AT5G08790 AT5G13320 <br>AT5G13370 AT5G13930 AT5G15230 AT5G15970 AT5G24770 AT5G24860 <br>AT5G25610 AT5G27420 AT5G37260 AT5G44420 AT5G47220 AT5G54490 <br>AT5G54610 AT5G59220 AT5G59310 AT5G59320 AT5G62920 AT5G66700                                                                                         | 692 | 1.24E-16 |
| 36.20.16    | plant defense response                                | 15 | 1.17 | AT1G75040 AT2G14610 AT2G22330 AT3G12500 AT3G14210 AT3G15210 <br>AT3G26830 AT3G57260 AT4G11650 AT4G14400 AT4G23190 AT4G23600 <br>AT5G24770 AT5G44420 AT5G47220                                                                                                                                                                                                                                                                                                                                                                                                                                                                                                                                                                                                                                                                                                                                                                                                                                                       | 124 | 4.56E-04 |
| 36.20.16.03 | jasmonic acid/ethylene dependent systemic resistance  | 4  | 0.31 | AT3G12500 AT3G15210 AT5G44420 AT5G47220                                                                                                                                                                                                                                                                                                                                                                                                                                                                                                                                                                                                                                                                                                                                                                                                                                                                                                                                                                             | 25  | 2.41E-02 |



|             |                                               |    |      |                                                                                                                                                                                                                                                                                                                                                                                                                                                                                                                                                                                                                                                                                                                                                                               |     |          |
|-------------|-----------------------------------------------|----|------|-------------------------------------------------------------------------------------------------------------------------------------------------------------------------------------------------------------------------------------------------------------------------------------------------------------------------------------------------------------------------------------------------------------------------------------------------------------------------------------------------------------------------------------------------------------------------------------------------------------------------------------------------------------------------------------------------------------------------------------------------------------------------------|-----|----------|
| 36.20.18    | plant hormonal regulation                     | 75 | 5.87 | AT1G04240 AT1G17345 AT1G18330 AT1G19050 AT1G29395 AT1G29490 AT1G48000 AT1G56650 AT1G59940 AT1G66380 AT1G67710 AT1G72430 AT1G75580 AT1G75750 AT1G80840 AT2G14580 AT2G16580 AT2G18010 AT2G23170 AT2G24850 AT2G33380 AT2G34810 AT2G36270 AT2G39800 AT2G40670 AT2G46680 AT2G47190 AT3G02850 AT3G02885 AT3G04720 AT3G09940 AT3G12955 AT3G15210 AT3G18780 AT3G23250 AT3G24500 AT3G26830 AT3G28210 AT3G28580 AT3G45140 AT3G48100 AT3G48920 AT4G12550 AT4G14400 AT4G22880 AT4G23170 AT4G23600 AT4G27410 AT4G34710 AT4G34790 AT4G34800 AT4G36110 AT4G37390 AT4G37760 AT4G38860 AT5G03310 AT5G08790 AT5G13320 AT5G13370 AT5G13930 AT5G15230 AT5G15970 AT5G24770 AT5G24860 AT5G25610 AT5G27420 AT5G37260 AT5G44420 AT5G54490 AT5G54610 AT5G59220 AT5G59310 AT5G59320 AT5G62920 AT5G66700 | 589 | 4.26E-16 |
| 36.20.18.01 | auxin response                                | 22 | 1.72 | AT1G04240 AT1G17345 AT1G29490 AT1G72430 AT1G75580 AT2G16580 AT2G18010 AT2G23170 AT3G12955 AT3G23250 AT4G12550 AT4G34790 AT4G34800 AT4G36110 AT4G37390 AT4G38860 AT5G03310 AT5G13320 AT5G13370 AT5G37260 AT5G54490 AT5G66700                                                                                                                                                                                                                                                                                                                                                                                                                                                                                                                                                   | 244 | 1.58E-03 |
| 36.20.18.02 | ethylen response                              | 9  | 0.7  | AT1G18330 AT2G14580 AT2G47190 AT3G04720 AT3G15210 AT3G23250 AT3G24500 AT5G37260 AT5G44420                                                                                                                                                                                                                                                                                                                                                                                                                                                                                                                                                                                                                                                                                     | 100 | 3.59E-02 |
| 36.20.18.04 | cytokinin response                            | 7  | 0.54 | AT1G19050 AT1G59940 AT1G67710 AT2G40670 AT3G18780 AT3G48100 AT5G62920                                                                                                                                                                                                                                                                                                                                                                                                                                                                                                                                                                                                                                                                                                         | 49  | 5.98E-03 |
| 36.20.18.05 | abscisic acid response                        | 24 | 1.88 | AT1G29395 AT1G48000 AT1G75750 AT2G33380 AT2G36270 AT2G39800 AT2G46680 AT2G47190 AT3G02850 AT3G15210 AT3G24500 AT3G26830 AT3G28210 AT3G28580 AT4G23600 AT4G27410 AT4G34710 AT5G15970 AT5G25610 AT5G27420 AT5G37260 AT5G59220 AT5G59310 AT5G59320                                                                                                                                                                                                                                                                                                                                                                                                                                                                                                                               | 161 | 2.44E-07 |
| 36.25       | animal specific systemic sensing and response | 18 | 1.41 | AT1G03620 AT1G17420 AT2G02990 AT2G06050 AT2G24850 AT2G34810 AT3G45140 AT4G10270 AT4G22880 AT4G23600 AT4G34710 AT4G37760 AT5G08790 AT5G13930 AT5G14780 AT5G24770 AT5G43570 AT5G43580                                                                                                                                                                                                                                                                                                                                                                                                                                                                                                                                                                                           | 107 | 1.28E-06 |
| 36.25.16    | immune response                               | 18 | 1.41 | AT1G03620 AT1G17420 AT2G02990 AT2G06050 AT2G24850 AT2G34810 AT3G45140 AT4G10270 AT4G22880 AT4G23600 AT4G34710 AT4G37760 AT5G08790 AT5G13930 AT5G14780 AT5G24770 AT5G43570 AT5G43580                                                                                                                                                                                                                                                                                                                                                                                                                                                                                                                                                                                           | 100 | 4.55E-07 |
| 36.25.16.08 | response to wounding                          | 17 | 1.33 | AT1G17420 AT2G02990 AT2G06050 AT2G24850 AT2G34810 AT3G45140 AT4G10270 AT4G22880 AT4G23600 AT4G34710 AT4G37760 AT5G08790 AT5G13930 AT5G14780 AT5G24770 AT5G43570 AT5G43580                                                                                                                                                                                                                                                                                                                                                                                                                                                                                                                                                                                                     | 80  | 7.68E-08 |
| 40          | CELL FATE                                     | 31 | 2.42 | AT1G17420 AT1G19050 AT1G20190 AT1G26770 AT1G59940 AT1G62980 AT1G67710 AT1G75750 AT1G75780 AT2G02990 AT2G17480 AT2G26560 AT2G29350 AT2G40670 AT3G18000 AT3G18780 AT3G45960 AT3G48100 AT3G49110 AT3G60140 AT4G14400 AT4G17030 AT4G23410 AT4G37490 AT4G37990 AT5G08790 AT5G19530 AT5G20250 AT5G25810 AT5G35630 AT5G62920                                                                                                                                                                                                                                                                                                                                                                                                                                                         | 450 | 1.27E-02 |
| 40.02.03    | activity of intercellular mediators           | 7  | 0.54 | AT1G19050 AT1G59940 AT1G67710 AT2G40670 AT3G18780 AT3G48100 AT5G62920                                                                                                                                                                                                                                                                                                                                                                                                                                                                                                                                                                                                                                                                                                         | 46  | 4.18E-03 |

|             |                                                                   |    |      |                                                                                                                                                                                                                                                                                                                                                                                                                                                                                                                                                                                                                                                                                                                                                                                                                                                                                                                                                                                             |      |          |
|-------------|-------------------------------------------------------------------|----|------|---------------------------------------------------------------------------------------------------------------------------------------------------------------------------------------------------------------------------------------------------------------------------------------------------------------------------------------------------------------------------------------------------------------------------------------------------------------------------------------------------------------------------------------------------------------------------------------------------------------------------------------------------------------------------------------------------------------------------------------------------------------------------------------------------------------------------------------------------------------------------------------------------------------------------------------------------------------------------------------------|------|----------|
| 40.02.03.01 | cytokines (interleukines,<br>colony stimulating factors,<br>etc.) | 7  | 0.54 | AT1G19050 AT1G59940 AT1G67710 AT2G40670 AT3G18780 AT3G48100 <br>AT5G62920                                                                                                                                                                                                                                                                                                                                                                                                                                                                                                                                                                                                                                                                                                                                                                                                                                                                                                                   | 46   | 4.18E-03 |
| 40.20       | cell aging                                                        | 6  | 0.47 | AT2G02990 AT2G29350 AT3G60140 AT4G23410 AT5G20250 AT5G35630                                                                                                                                                                                                                                                                                                                                                                                                                                                                                                                                                                                                                                                                                                                                                                                                                                                                                                                                 | 49   | 2.18E-02 |
| <b>42</b>   | <b> BIOGENESIS OF CELLULAR<br/>COMPONENTS</b>                     | 90 | 7.05 | AT1G02810 AT1G19210 AT1G19510 AT1G20190 AT1G21910 AT1G26250 <br>AT1G26770 AT1G43160 AT1G48000 AT1G52250 AT1G53170 AT1G54970 <br>AT1G56650 AT1G60920 AT1G62980 AT1G66230 AT1G66380 AT1G67750 <br>AT1G72360 AT1G72830 AT1G80840 AT2G15390 AT2G22630 AT2G24980 <br>AT2G26440 AT2G28700 AT2G36270 AT2G38080 AT2G38530 AT2G40340 <br>AT2G40750 AT2G42170 AT2G43220 AT2G43570 AT2G43580 AT2G43590 <br>AT2G44840 AT2G46400 AT2G46680 AT2G47520 AT3G01970 AT3G05690 <br>AT3G10710 AT3G11580 AT3G13760 AT3G15210 AT3G18780 AT3G19430 <br>AT3G23240 AT3G23250 AT3G24310 AT3G28730 AT3G45960 AT3G47430 <br>AT3G47540 AT3G48360 AT3G48920 AT3G49760 AT3G54580 AT3G54590 <br>AT4G02330 AT4G08410 AT4G13130 AT4G13620 AT4G17030 AT4G17460 <br>AT4G22880 AT4G23810 AT4G25470 AT4G25480 AT4G25910 AT4G33220 <br>AT4G34410 AT5G02350 AT5G04310 AT5G04960 AT5G06510 AT5G06640 <br>AT5G14750 AT5G15830 AT5G20860 AT5G21960 AT5G28770 AT5G47220 <br>AT5G47230 AT5G51990 AT5G62150 AT5G63160 AT5G64810 AT5G66700 | 1554 | 8.08E-03 |
| 42.01       | cell wall                                                         | 29 | 2.27 | AT1G02810 AT1G20190 AT1G26250 AT1G26770 AT1G54970 AT1G62980 <br>AT1G67750 AT2G15390 AT2G24980 AT2G26440 AT2G38080 AT2G43570 <br>AT2G43580 AT2G43590 AT3G10710 AT3G19430 AT3G45960 AT3G47540 <br>AT3G54580 AT3G54590 AT4G02330 AT4G08410 AT4G17030 AT4G33220 <br>AT5G04310 AT5G04960 AT5G06640 AT5G20860 AT5G62150                                                                                                                                                                                                                                                                                                                                                                                                                                                                                                                                                                                                                                                                           | 263  | 8.43E-06 |
| 42.30       | prokaryotic cytoplasmic<br>membrane                               | 1  | 0.07 | AT2G38530                                                                                                                                                                                                                                                                                                                                                                                                                                                                                                                                                                                                                                                                                                                                                                                                                                                                                                                                                                                   | 1    | 4.49E-02 |
| 42.34       | prokaryotic cell envelope<br>structures                           | 5  | 0.39 | AT2G43570 AT2G43580 AT2G43590 AT3G47540 AT5G62150                                                                                                                                                                                                                                                                                                                                                                                                                                                                                                                                                                                                                                                                                                                                                                                                                                                                                                                                           | 27   | 6.41E-03 |
| 42.34.07    | peptidoglycan layer or<br>other prokaryotic cell wall             | 5  | 0.39 | AT2G43570 AT2G43580 AT2G43590 AT3G47540 AT5G62150                                                                                                                                                                                                                                                                                                                                                                                                                                                                                                                                                                                                                                                                                                                                                                                                                                                                                                                                           | 21   | 2.02E-03 |

|       |                                    |     |      |                                                                                                                                                                                                                                                                                                                                                                                                                                                                                                                                                                                                                                                                                                                                                                                                                                                                                                                                                                                                                                                                                                                                                                                                                                                                                                                                                                                                                                                                                                                                                                                                                                                                                                                                |       |          |
|-------|------------------------------------|-----|------|--------------------------------------------------------------------------------------------------------------------------------------------------------------------------------------------------------------------------------------------------------------------------------------------------------------------------------------------------------------------------------------------------------------------------------------------------------------------------------------------------------------------------------------------------------------------------------------------------------------------------------------------------------------------------------------------------------------------------------------------------------------------------------------------------------------------------------------------------------------------------------------------------------------------------------------------------------------------------------------------------------------------------------------------------------------------------------------------------------------------------------------------------------------------------------------------------------------------------------------------------------------------------------------------------------------------------------------------------------------------------------------------------------------------------------------------------------------------------------------------------------------------------------------------------------------------------------------------------------------------------------------------------------------------------------------------------------------------------------|-------|----------|
| 70    | SUBCELLULAR LOCALIZATION           | 449 | 35.1 | <p>AT1G01620 AT1G02470 AT1G02810 AT1G02920 AT1G02930 AT1G03620 <br/> AT1G03870 AT1G04240 AT1G05240 AT1G06120 AT1G06350 AT1G07610 <br/> AT1G09932 AT1G12740 AT1G13300 AT1G16400 AT1G16410 AT1G17180 <br/> AT1G17190 AT1G17345 AT1G17420 AT1G17745 AT1G18330 AT1G19210 <br/> AT1G19510 AT1G20190 AT1G20620 AT1G20990 AT1G21100 AT1G21910 <br/> AT1G22230 AT1G22460 AT1G22740 AT1G24530 AT1G24575 AT1G26250 <br/> AT1G26770 AT1G26945 AT1G29490 AT1G31320 AT1G31580 AT1G32350 <br/> AT1G33030 AT1G35140 AT1G35910 AT1G43160 AT1G47510 AT1G47840 <br/> AT1G47960 AT1G48000 AT1G48325 AT1G49860 AT1G50730 AT1G52250 <br/> AT1G52700 AT1G52750 AT1G53030 AT1G53170 AT1G53680 AT1G54740 <br/> AT1G54970 AT1G55380 AT1G56650 AT1G58370 AT1G58420 AT1G59700 <br/> AT1G60190 AT1G60920 AT1G60970 AT1G61340 AT1G61800 AT1G62560 <br/> AT1G62975 AT1G62980 AT1G65310 AT1G65690 AT1G66130 AT1G66230 <br/> AT1G66380 AT1G66600 AT1G67710 AT1G67750 AT1G68010 AT1G68110 <br/> AT1G68450 AT1G69920 AT1G69930 AT1G70810 AT1G72360 AT1G72430 <br/> AT1G72610 AT1G72830 AT1G73120 AT1G74010 AT1G74080 AT1G74590 <br/> AT1G75750 AT1G75780 AT1G75830 AT1G77530 AT1G78120 AT1G78380 <br/> AT1G80130 AT1G80380 AT1G80840 AT2G01900 AT2G02850 AT2G02930 <br/> AT2G02990 AT2G05500 AT2G06050 AT2G14580 AT2G14610 AT2G15327 <br/> AT2G15400 AT2G15420 AT2G15430 AT2G16440 AT2G16450 AT2G16580 <br/> AT2G17070 AT2G17210 AT2G17270 AT2G17480 AT2G17510 AT2G17525 <br/> AT2G18010 AT2G18200 AT2G18210 AT2G18660 AT2G18700 AT2G19280 <br/> AT2G19970 AT2G19990 AT2G21640 AT2G22330 AT2G22500 AT2G22630 <br/> AT2G22880 AT2G23130 AT2G24980 AT2G25625 AT2G26010 AT2G26020 <br/> AT2G26440 AT2G26530 AT2G26560 AT2G27535 AT2G28190 AT2G28400 <br/> -----</p> | 10531 | 1.00E+00 |
| 70.01 | cell wall                          | 56  | 4.38 | <p>AT1G02810 AT1G05240 AT1G20190 AT1G24530 AT1G26250 AT1G26770 <br/> AT1G31580 AT1G35140 AT1G47960 AT1G54970 AT1G58370 AT1G62980 <br/> AT1G65310 AT1G67750 AT1G74010 AT1G75750 AT1G75830 AT2G24980 <br/> AT2G26010 AT2G26020 AT2G26440 AT2G38540 AT3G10710 AT3G15354 <br/> AT3G16240 AT3G18080 AT3G19430 AT3G45960 AT3G49110 AT3G49330 <br/> AT3G54580 AT3G54590 AT3G61820 AT4G02330 AT4G08410 AT4G17030 <br/> AT4G25250 AT4G33220 AT5G04310 AT5G04960 AT5G06640 AT5G06860 <br/> AT5G06870 AT5G17820 AT5G18470 AT5G20860 AT5G22460 AT5G25460 <br/> AT5G42180 AT5G44130 AT5G44420 AT5G44430 AT5G51520 AT5G53500 <br/> AT5G59320 AT5G62340</p>                                                                                                                                                                                                                                                                                                                                                                                                                                                                                                                                                                                                                                                                                                                                                                                                                                                                                                                                                                                                                                                                                   | 431   | 1.05E-12 |
| 70.27 | extracellular / secretion proteins | 21  | 1.64 | <p>AT1G20190 AT1G62980 AT1G72610 AT2G02850 AT2G02990 AT2G14580 <br/> AT2G14610 AT2G18660 AT2G19970 AT2G19990 AT2G41280 AT4G07820 <br/> AT4G14630 AT4G17030 AT4G25780 AT4G25790 AT4G30320 AT4G33720 <br/> AT5G20630 AT5G39130 AT5G57625</p>                                                                                                                                                                                                                                                                                                                                                                                                                                                                                                                                                                                                                                                                                                                                                                                                                                                                                                                                                                                                                                                                                                                                                                                                                                                                                                                                                                                                                                                                                     | 99    | 2.41E-09 |

---
