# Supplementary material for: Alkamides Activate Jasmonic Acid Biosynthesis and Signaling Pathways and Confer Resistance to Botrytis cinerea in Arabidopsis thaliana
Source: PubMed Central journal article supplement (PMC3208606; doi:10.1371/journal.pone.0027251), 2011-11-04
Supplement: pone.0027251.s007.pdf [file pone.0027251.s007.pdf]

**Table S3. N-isobutyl decanamide regulated genes used for qRT-PCR.**

| Locus     | Predicted function             | Forward                    | Reverse                    |
|-----------|--------------------------------|----------------------------|----------------------------|
| At3g18780 | actin 2/7                      | CGTACAACCGGTATTGTGCTGAT    | GCTTGGTGCAAGTGCTGTGATTTTC  |
| At1g20990 | DC1 Zinc finger                | GCTGCGCCATGTTATCTCCTTCC    | ACCCTCCCGTTTCGCTTACCTC     |
| At1g66600 | WRKY63                         | TCGTCAACCACACCATGAGTCT     | CTCCAGGTGAAGCCGTCATC       |
| At4g30290 | xyloglucosyl transferase       | GGGGTGATGGTCGTGGAAAGATT    | CCAGCAGAGTTACCAGGGACAAGTT  |
| At2g38600 | acid phosphatase               | TCTCCAGCAATACAACCTGTTCTT   | CCTCATAATCAGCCTTTTCATAACCA |
| At3g47480 | calcium-binding EF             | CTTTTCCCTTTTCGTTTCCATCTC   | TCGATTATCGCCTTGACTTCTTC    |
| At2g29350 | senescence-associated SAG13    | CAATATTTCAAGCCGACCACAGA    | ACGACTCCAGCAGCAGAGGATA     |
| At4g15690 | glutaredoxin                   | AGACTTTTGGCGTGAACCCGACTATC | AAGGGAGCGGTTGAGATGGAGACT   |
| At5g19470 | MutT/nudix kinase              | TGTCCCACTCCACCTCCTT        | CAAAAACATCGTTCCAGGTGAA     |
| At1g64780 | ammonium transporter 1         | TCCGCCTACCTTGTCTTTGC       | ACCAAAGGCGAATGCGAATC       |
| At5g59320 | lipid transfer LTP3            | ATGGCTTTTCGCTTTGAGGTTCTTC  | GTTGGCGGTCTGGTGTGGTTTTTA   |
| At4g02330 | pectinesterase                 | CGTTTCGAGACGGTCAATATCACT   | TGTCGTTGATTAGAGGCAATGC     |
| At1g49860 | glutathione S-transferase      | CCATATCAAGGTTTAGCCACAGACGA | GCAAGATGATGCAGATCCGCTAA    |
| At4g19690 | iron-responsive transporter    | CGTGCGTCAACAAAGCTAAAGC     | CGGAGGCGAAAGACTTAATGATA    |
| At1g52890 | no apical meristem NAM         | CCACGGTCTTGCAGATACTTCTAACT | ACCCGTGACTGCTCTCGACTTCCTC  |
| At5g53820 | ABA-inducible/LEA domain       | CCAAGCTAAAGGCCAAACTCA      | ACTCGCACCTTGTGCCTTCT       |
| At5g44420 | plant defensin protein PDF1.2a | TCATCACCTTATCTTTCGCTGCTCTT | ATGATCCATGTTTGGCTCCTTCAAG  |
| At5g38910 | germin protein LEA7            | TTTACGACAGAACCCACCTCACA    | GGAAACACAAAGACATCACCTCGTA  |
| At4g26280 | sulfotransferase               | ACAATCCTCACAACCTCCTCTCA    | CAAACGATATGCCAACGTGACA     |
| At5g06510 | CCAAT containing HAP2          | TGCATCACTCACGCCATCTC       | GACTCATTGCTTCCCTCGATGA     |
| At3g45140 | lipoxigenase LOX2              | AGTCTTGTCAACGGAGGTGGAAT    | CCATGTTCTGCGGTCTTATCTTC    |
| At1g17420 | lipoxigenase LOX3              | GGCAAAGAGGTTTCCTTACCC      | CTTTGAGCGACGGAATTAGG       |
| At1g30135 | jasmonate-ZIM-domain JAZ8      | CAGCTTCCAAATCCAAAAGC       | TATCGTTCGTGAATGGTACGG      |
| At3g25770 | allene oxide cyclase AOC2      | GCCAAGAAGAACCTCACTGC       | TCCGAGACCGAACATTAAGC       |
| At5g42650 | allene oxide synthase AOS      | GACCAATCAAAGACCGTTGG       | ATCGAATAAAACCGGGAAGC       |
| At5g24770 | vegetative storage VSP2        | GAAAACCATCTTTGGGAACG       | CGGTTTTGGAGTCGTATTGG       |
| At2g06050 | OPR3                           | GGAAGCAGTTCACGCTAAGG       | GAGGTTTCGGGTACTTCACG       |
| At5g47220 | ERF2                           | TAATTCCGGTGAACCTGACC       | CACGTGTCTCATACCAACC        |
| At4g30140 | GDSL-motif lipase              | CATCGGAAGCAACGATTACC       | ACCGAACAACGCTACATTCC       |
| At3g26830 | phytoalexin deficient PAD3     | GCAAGAGAACGATGGAGATG       | TCTTGTCCCCAAGTGTGTC        |
|           | <i>B. cinerea</i> actinA       | GGTAACATTGTTATGTCTGG       | CTTGACCTTCATCGACG          |
